# Supplementary material for: Audiologists’ preferences for patient-centredness: a cross-sectional questionnaire study of cross-cultural differences and similarities among professionals in Portugal, India and Iran
Source: PubMed Central journal article supplement — BMJ Open. 2014 Oct 14;4(10):e005915. doi: 10.1136/bmjopen-2014-005915 (PMC4201997; doi:10.1136/bmjopen-2014-005915), 2014-10-14
Supplement: bmjopen-2014-005915.draft_revisions.pdf [file bmjopen-2014-005915.draft_revisions.pdf]

# BMJ Open

## Audiologists' preferences for patient-centredness: Differences and similarities among professionals in Portugal, India and Iran

|                                 |                                                                                                                                                                                                                                                                                                                                                                                                               |
|---------------------------------|---------------------------------------------------------------------------------------------------------------------------------------------------------------------------------------------------------------------------------------------------------------------------------------------------------------------------------------------------------------------------------------------------------------|
| Journal:                        | <i>BMJ Open</i>                                                                                                                                                                                                                                                                                                                                                                                               |
| Manuscript ID:                  | bmjopen-2014-005915                                                                                                                                                                                                                                                                                                                                                                                           |
| Article Type:                   | Research                                                                                                                                                                                                                                                                                                                                                                                                      |
| Date Submitted by the Author:   | 13-Jun-2014                                                                                                                                                                                                                                                                                                                                                                                                   |
| Complete List of Authors:       | Manchaiah, Vinaya; Anglia Ruskin University, Department of Vision and Hearing Sciences<br>Gomersall, Philip; Anglia Ruskin University, Vision and Hearing Sciences<br>Tomé, David; Polytechnic Institute of Porto, Audiology<br>Ahmadi, Tayebeh; University of Social Welfare and Rehabilitation Sciences, Audiology<br>Krishna, Rajalakshmi; University of Mysore, All India Institute of Speech and Hearing |
| <b>Primary Subject Heading</b>: | Patient-centred medicine                                                                                                                                                                                                                                                                                                                                                                                      |
| Secondary Subject Heading:      | Ear, nose and throat/otolaryngology                                                                                                                                                                                                                                                                                                                                                                           |
| Keywords:                       | Audiology < OTOLARYNGOLOGY, International health services < HEALTH SERVICES ADMINISTRATION & MANAGEMENT, MEDICAL EDUCATION & TRAINING                                                                                                                                                                                                                                                                         |
|                                 |                                                                                                                                                                                                                                                                                                                                                                                                               |

SCHOLARONE™  
Manuscripts

only

# Audiologists' preferences for patient-centredness: Differences and similarities among professionals in Portugal, India and Iran

Vinaya Manchaiah<sup>1,2</sup>, Philip A. Gomersall<sup>1</sup>, David Tomé<sup>3</sup>, Tayebah Ahmadi<sup>4</sup> & Rajalakshmi Krishna<sup>5</sup>.

1. Department of Vision and Hearing Sciences, Anglia Ruskin University, Cambridge, United Kingdom
2. Linnaeus Centre HEAD, Department of Behavioral Sciences and Learning, The Swedish Institute for Disability Research, Linköping University, Linköping, Sweden
3. Department of Audiology, School of Allied Health Sciences, Polytechnic Institute of Porto, Vila Nova de Gaia, Portugal
4. Department of Audiology, University of Social Welfare and Rehabilitation Sciences, Tehran, Iran
5. All India Institute of Speech and Hearing, University of Mysore, Mysore, India

**Corresponding Author:** Philip A. Gomersall

**Address:** Department of Vision and Hearing Sciences, Coslett 204, Anglia Ruskin University, Cambridge CB1 1PT, United Kingdom

**Email:** [phil.gomersall@anglia.ac.uk](mailto:phil.gomersall@anglia.ac.uk); **Tel:** +44 (0)1223 698653

## Abstract

**Objective:** Patient-centredness has become one of the important aspects of health service delivery, however, a limited number of studies exist that focus on this concept in the domain of hearing healthcare. The objective of this study was to examine and compare audiologists' preferences for patient-centredness in Portugal, India and Iran. **Design:** The study used a cross-sectional survey design and purposive sampling to recruit audiologists' from three different countries. **Participants:** A total of 191 fully-completed responses were included in the analysis (55 from Portugal, 78 from India and 58 from Iran). **Main outcome measure:** The Patient-Practitioner Orientation Scale. **Results:** A significant difference ( $p < 0.001$ ) was found between audiologists' preferences for patient-centredness in three countries. No significant differences were found in terms of age and duration of experience among audiologists from different countries. Audiologists in Portugal had a greater preference for patient-centredness when compared to audiologists in India and Iran. **Conclusion:** There are difference and similarities in audiologists' preferences for patient-centredness among countries. These findings may have implications to training professionals and also to clinical practice in terms of optimising hearing healthcare across countries.

## Key Words

Patient-centeredness, Audiology, hearing healthcare, cross-culture

## Summary

### Article Focus

- To examine and compare audiologists' preferences for patient-centredness in Portugal, India and Iran.

### Key Message

- A significant level of difference was found between audiologists' preferences for patient-centredness in three countries.
- Audiologists in Portugal had a greater preference for patient-centredness when compared to audiologists in India and Iran.
- These findings may have implications to training professionals and also to clinical practice in terms of optimising hearing healthcare across countries.

### Strengths and Weakness

- A response rate of 76% was obtained for this questionnaire-based study and there was diversity in the data from audiologists' distributed across three countries.
- Some variables such as healthcare delivery models and educational system were not controlled for, but may have contributed to the differences and similarities noticed in audiologists preferences.

## Introduction

There has been an increase in advocacy towards patients' involvement in their health and care delivery, hence the concept 'patient-centredness' has received much attention over the past few decades.<sup>1</sup> Patient-centredness involves aspects such as increased importance placed on patient participation, self-determination of patients in their healthcare, and creation of a power-balanced therapeutic relationship between patients and professionals.<sup>2</sup> Although there has been little consensus over the meaning of this concept universally, patient-centredness has been described with five main dimensions: (1) biopsychosocial perspective; (2) patient as a person; (3) shared power and responsibility; (4) therapeutic alliance; and (5) clinician as a person.<sup>1</sup> Patient-centredness has been suggested to be fundamental part of the successful management of chronic health conditions.<sup>3</sup>

Studies from various areas have suggested that the health professional's preferences towards patient-centredness is important in determining healthcare outcomes and patient satisfaction.<sup>4</sup> Issues surrounding patient-centred care have also been linked to malpractice claims,<sup>8</sup> and in general a preference for patient-centeredness seems to correlate well with good clinical practices.<sup>9</sup> It seems therefore that professionals' preference for patient-centred care has significant value in healthcare service delivery in general. Moreover, studies have suggested that audiology patients value interaction with the clinicians. For example, a qualitative study aimed at exploring the shared decision making in adults with acquired hearing impairment suggested that patients wanted rehabilitative audiologists to hear their experiences and preferences and to tailor their interventions accordingly.<sup>10</sup> Hence, patient-centredness is an important area in the area of rehabilitative audiology.

1  
2  
3  
4  
5  
6  
7  
8  
9  
10  
11  
12  
13  
14  
15  
16  
17  
18  
19  
20  
21  
22  
23  
24  
25  
26  
27  
28  
29  
30  
31  
32  
33  
34  
35  
36  
37  
38  
39  
40  
41  
42  
43  
44  
45  
46  
47  
48  
49  
50  
51  
52  
53  
54  
55  
56  
57  
58  
59  
60

Audiology as a profession has undergone significant changes over last few decades. Some researchers believe that there is a paradigm shift; moving from a focus on the technological aspects of hearing healthcare to a more person-centred approach to rehabilitation.<sup>11 12</sup> There is limited empirical evidence to support these observations of a shift in professionals' preferences and practices, with only a small number of published studies on patient-centredness.<sup>13 14</sup> Nevertheless, studies have suggested a preference for patient-centred healthcare in various disciplines,<sup>15</sup> including in hearing healthcare.<sup>10</sup>

Grenness et al.<sup>13</sup> studied the views of older adults who own hearing aids in order to define patient-centred care specific to audiological rehabilitation. Interviews were conducted with ten older adults with hearing aids, exploring their views and the data were analysed using qualitative content analysis. The results suggested three dimensions: (1) the therapeutic relationship; (2) the players - patient and audiologist; and (3) clinical process, and an overarching theme of individualised care specific to audiological rehabilitation. The reader may refer to a recent literature review by Grenness et al.<sup>13</sup> for further details on patient-centred care in relation to rehabilitative Audiology.

A recent study found that Australian audiologists had a high preference for patient-centredness.<sup>14</sup> Moreover, demographic factors such as age, duration of work experience and employment type (i.e., public/ private) acted as influencing factors towards explaining patient-centredness. For example, older audiologists and those who had practiced longer had a significantly greater preference to patient-centredness when compared to younger and less-experienced audiologists. This is the only published study that has explored audiologists' preferences towards patient-centredness. As a consequence, it is unknown if audiologists in other countries would display similar preferences. Given that Audiology practices vary

1  
2  
3  
4 considerably across countries,<sup>16</sup> it would be useful to examine audiologists' preferences for  
5  
6 patient-centeredness across different countries which vary in terms of culture and healthcare  
7  
8 systems.  
9

10  
11  
12 Cultural competence and patient-centredness are key aspects that could influence healthcare  
13  
14 quality.<sup>17</sup> We hypothesise that cultural aspects can influence both patients' and providers'  
15  
16 preferences in healthcare and towards patient-centredness. During a recent international  
17  
18 seminar on '*Cross-Cultural Communication: Exploring cross-cultural differences and*  
19  
20 *similarities in attitudes towards hearing help-seeking and uptake of hearing aids*' (held in  
21  
22 Bristol, UK during February 2013), it was identified that there are few cross-cultural studies  
23  
24 in the area of hearing healthcare, and it was recognised that there is an immediate need for  
25  
26 further research in this area.<sup>18</sup> Considering the above, we were interested in understanding the  
27  
28 audiologists' preference to patient-centredness across cultures.  
29  
30  
31  
32  
33  
34

35 The aim of the current study was to examine and compare audiologists' preferences for  
36  
37 patient-centredness in Portugal, India and Iran. These countries vary in terms of healthcare  
38  
39 system, culture and socio-economic status. However, they were chosen as they all have a  
40  
41 minimum educational level requirement of a Bachelor's degree education for Audiologists,  
42  
43 and also due to convenience in data collection.  
44  
45  
46  
47

## 48 **Method**

### 49 *Ethical Considerations*

50  
51 Ethical approval was obtained from the *School of Allied Health Sciences, Polytechnic*  
52  
53 *Institute of Porto* at Porto and *All India Institute of Speech and Hearing* at Mysore for data  
54  
55 collection in Portugal and India respectively. This kind of study did not require ethical  
56  
57  
58  
59  
60

1  
2  
3  
4 approval under the *Department of Audiology, University of Social Welfare and Rehabilitation*  
5  
6 *Sciences* at Tehran for data collection in Iran.  
7  
8  
9

### 10 ***Study Design and Participants***

11  
12 The current study used a cross-sectional survey design and purposive sampling to recruit  
13  
14 participants. The email mailing list was obtained from university and professional  
15  
16 associations which consisted of audiologists distributed throughout each of the three  
17  
18 countries. The Patient-Practitioner Orientation Scale (PPOS) questionnaire, with some  
19  
20 additional demographics questions (i.e., age, gender, number of years of experience, work  
21  
22 set-up, country of origin and country currently practicing), was sent to 260 Audiologists (80  
23  
24 in Portugal, 110 in India and 70 in Iran) via email, requesting them to complete and return  
25  
26 back to the researcher by email. Two email reminders were sent for non-respondents after  
27  
28 two and four weeks respectively. As the Email ID might have contained some information  
29  
30 that may have helped identify the individual, the survey was not fully anonymous. In the  
31  
32 interest of keeping the survey short, only limited demographic information was requested and  
33  
34 the choice was made to consider the most important aspects based on previous studies.  
35  
36  
37  
38  
39  
40

### 41 ***Questionnaire***

42  
43 The PPOS was developed by Krupat et al.<sup>19</sup> to study physician preferences towards patient-  
44  
45 centredness. However, a modified version of the PPOS that has previously been used to study  
46  
47 audiologists' preferences towards patient-centredness was used in the current study.<sup>14</sup> This  
48  
49 modified version of the PPOS was found to have acceptable internal consistency ( $\alpha=0.78$ ).  
50  
51 This scale has eighteen questions which are scored on a 6-point Likert scale (1 = strongly  
52  
53 agree; 6 = strongly disagree). The total score ranges from 18 (most patient-centred) to 108  
54  
55 (most audiologist-centred), and there are two sub-scales: The first nine-item sub-scale,  
56  
57  
58  
59  
60



1  
2  
3  
4 *sharing*, reflects the extent to which the respondent believes that patients desire information  
5  
6 and should be part of the decision making process (e.g., patients should be treated as if they  
7  
8 were partners with the audiologists, equal in power and status). The other nine-item sub-  
9  
10 scale, *caring*, reflects the extent to which the respondent sees the patient's expectations,  
11  
12 feelings, and life circumstances as critical elements in the treatment process (e.g., a treatment  
13  
14 plan cannot succeed if it is in conflict with a patient's lifestyle or values).  
15  
16  
17  
18  
19

20 An English version of the questionnaire was administered in India. Portuguese and Farsi  
21  
22 translated versions were used in Portugal and Iran respectively. The questionnaire translation  
23  
24 process was aimed at achieving different language versions of the English instrument that are  
25  
26 conceptually equivalent in each of the target countries/cultures. That is, the focus was on  
27  
28 cross-cultural and conceptual, rather than on linguistic/literal equivalence. We followed the  
29  
30 well accepted forward-translations and back-translations method.<sup>20</sup> This process involved  
31  
32 four main stages: forward translation; expert back translation; review and resolution of any  
33  
34 discrepancies; and pre-testing with five participants each, in both Portugal and Iran.  
35  
36  
37  
38  
39

### 40 **Data Analysis**

41 In the first instance, descriptive statistics (i.e., mean, standard deviation), a test of normality  
42  
43 and a test of homogeneity of variance were performed. Mean total PPOS scores for  
44  
45 audiologists from three countries were compared using an independent one-way analysis of  
46  
47 variance (ANOVA). An alpha level of 0.01 was used to determine significance. Bonferroni  
48  
49 *post-hoc* analysis was performed to further examine the relationship between groups. Further,  
50  
51 a one-way analysis of covariance (ANCOVA) was performed with age and duration of work  
52  
53 experience as co-variates in order to exclude the influence of these variables on differences in  
54  
55 the group means.  
56  
57  
58  
59  
60

## Results

A total of 198 responses (response rate of 76%) were received. This included: 55 responses from Portugal (response rate of 69%); 82 responses from India (response rate of 75%); and 61 responses from Iran (response rate of 87%). However, three responses from Iran (incomplete data) and four responses from India (audiologists currently practicing in a different country) were excluded. A total of 191 responses (i.e., 73%) were included in the analysis (55 from Portugal, 78 from India and 58 from Iran). Table 1 presents the demographic information and Table 2 presents PPOS scores. ANOVA showed no difference between groups in terms of age [ $F(2, 188) = 2.13, p = 0.121$ ] and also duration of work experience [ $F(2, 188) = 1.16, p = 0.313$ ].

[Table 1 near here]

[Table 2 near here]

Data for both full-scale and subscales were found to be normally distributed (based on Kolmogorov-Smirnov test and visual examination of histograms). Homogeneity of variances (based on Levene's test) was found for *caring* and *total mean* ( $p = 0.625$  and  $0.129$  respectively) and not for *sharing* ( $p = 0.020$ ). Since our data were found to be normally distributed, we elected to use ANOVA for our analysis, despite the fact that homogeneity of variances could not be assumed for the *sharing* subscale. A robust procedures (Welch and Brown-Forsythe) test was performed to check ANOVA findings (see Table 3), which indicated the same significant differences between group means ( $p < 0.001$  in all cases).

[Table 3 near here]

1  
2  
3  
4 The PPOS mean scores were tested for differences between countries using a one way  
5  
6 between-subjects ANOVA (see Table 4). A significant result was found for *sharing* subscale  
7  
8 [ $F(2, 188) = 39.76$ ], *caring* subscale [ $F(2, 188) = 24.61$ ] and the *full* scale [ $F(2, 188) =$   
9  
10 42.49]. Further, Bonferroni *post-hoc* test showed that the difference between Portugal and  
11  
12 India and also Portugal and Iran were significant for *sharing* subscale, *caring* subscale and  
13  
14 *full* scale ( $p = 0.001, 0.001$  and  $0.001$  respectively). However, the difference between India  
15  
16 and Iran were not statistically significant for *sharing* subscale, *caring* subscale and *full* scale  
17  
18 ( $p = 0.171, 0.841$  and  $1.0$  respectively).  
19  
20  
21  
22  
23  
24

25 [Table 4 near here]  
26  
27

28 These results strongly suggest that there are some differences and some similarities in  
29  
30 audiologists' preferences towards patient-centredness from different countries (see Figure 1).  
31  
32 Audiologists in Portugal had significantly greater preference for patient-centredness when  
33  
34 compared to audiologists in India and Iran whose preferences did not differ much.  
35  
36  
37  
38  
39

40 [Figure 1 near here]  
41  
42  
43

44 Whilst no significant differences were observed between the populations with respect to age  
45  
46 and experience, this does not exclude some possible influence of these variables on the data.  
47  
48 To exclude this, we elected to include these variables as covariates, and assess if this had an  
49  
50 influence on the main effect observed: The data met the necessary assumptions (i.e., linearity,  
51  
52 homoscedasticity and homogeneity of regression slopes) and the ANCOVA results with age  
53  
54 and duration of work experience as covariates and PPOS scores as dependent variable gave  
55  
56 results consistent with the ANOVA, with a significant main effect for the full scale and  
57  
58  
59  
60

1  
2  
3  
4 subscales, and with no significant interaction effect seen. This suggests that difference exists  
5  
6 between the groups in preference for patient-centredness, even after accounting for age and  
7  
8 duration of work experience.  
9

## 10 11 12 13 **Discussion**

14  
15 This study examined and compared audiologists' preferences for patient-centredness in  
16  
17 Portugal, India and Iran. The PPOS scores indicate the self-reported preference for aspects of  
18  
19 patient-centredness. The study results, as expected, suggest some differences and some  
20  
21 similarities in preferences for patient-centredness among audiologists from Portugal ( $M =$   
22  
23 4.2;  $SD = 0.5$ ), India ( $M = 3.5$ ;  $SD = 0.6$ ) and Iran ( $M = 3.4$ ;  $SD = 0.4$ ). Generally,  
24  
25 audiologists' in Portugal had a high preference for patient-centredness, when compared to  
26  
27 audiologists in India and Iran. Moreover, a recent study found that Australian audiologists<sup>14</sup>  
28  
29 have high preference for patient-centredness ( $M = 4.46$ ;  $SD = 0.52$ ), which is similar to  
30  
31 Portugal audiologists' preferences reported in the current study.  
32  
33  
34  
35  
36  
37

38 From examination of the responses to each item it appears that audiologists' preferences for  
39  
40 patient-centredness seem to vary from one situation to other situation. For example, mean  
41  
42 PPOS score 2.4 in *item 1* when compared to 4.8 in *item 7* (see Table 2). Similar results have  
43  
44 been reported in a recent Australian study.<sup>14</sup> Moreover, the trend for higher PPOS scores  
45  
46 provided by audiologists from Portugal compared to their peers from India and Iran, was true  
47  
48 for almost all questionnaire *items* when analysed individually. This suggests that the  
49  
50 differences in preference for patient centredness are consistent across a variety of situations.  
51  
52  
53  
54

55 Studies from other disciplines have shown that the PPOS scores indicating preference for  
56  
57 patient-centredness can vary among professionals in different countries. For example,  
58  
59  
60

1  
2  
3  
4 medical practitioners' mean PPOS scores of 4.8 in the USA,<sup>4</sup> compared to 3.3 in Greece.<sup>21</sup>  
5  
6 Moreover, the differences in PPOS scores have also been observed across medical  
7  
8 specialists.<sup>5</sup> For example, general practitioners and oncology physicians had higher PPOS  
9  
10 mean scores (i.e., 4.3 and 5.0 respectively) when compared with physicians with a surgical  
11  
12 background (i.e., 2.9). Thus it appears that the training route and specific duties of the  
13  
14 professional could be considered as factors in determining patient-centred practice, as could  
15  
16 the local culture (see later discussion).  
17  
18  
19  
20

21  
22 Other posited potential influences on audiologists' preferences for patient centredness are  
23  
24 age, duration of work experience and employment type.<sup>14</sup> In the current study no significant  
25  
26 differences existed between groups in terms of age and duration of work experience. The  
27  
28 distribution of audiologists among different areas of employment was broadly similar  
29  
30 between countries. However, differences were noted in terms of participants' gender between  
31  
32 countries. The estimates of male/female ratio practicing in Audiology in these countries, as  
33  
34 indicated by the professional bodies, are 1:4, 1:2 and 1:2 in Portugal, India and Iran  
35  
36 respectively. The current study sample had a similar gender pattern of audiologists even  
37  
38 though not exactly matching these ratios. Gender has been found to influence the  
39  
40 practitioners' preference for patient-centredness with women displaying a high preference to  
41  
42 patient-centredness than male counterparts,<sup>22 23</sup> although it was not a significant factor for  
43  
44 audiologists preferences for patient-centred in a large scale Australian study.<sup>14</sup> Hence, further  
45  
46 exploration of a gender effect in preference for patient-centredness is necessary in future  
47  
48 studies.  
49  
50  
51  
52  
53  
54

55 The local healthcare system, national culture, organisational-related factors (see Grenness et  
56  
57 al.<sup>2</sup>), ethnicity<sup>24</sup> and cross-cultural aspects<sup>25</sup> as indicated in studies from other areas may have  
58  
59  
60

1  
2  
3  
4 contributed to the differences and similarities noted in the current study results. We  
5  
6 hypothesise that one of the main contributing factors could be the 'culture'. Geert Hofstede  
7  
8 defines culture as '*the collective programming of the mind distinguishing the members of one*  
9  
10 *group or category of people from another*'.<sup>26</sup> Figure 2 represents Hofstede's dimensions of  
11  
12 national culture in Portugal, India and Iran, which include: power distance; individualism;  
13  
14 masculinity; uncertainty avoidance; pragmatism; and indulgence.<sup>26</sup> A greater number of  
15  
16 similarities are noticed between India and Iran when compared to Portugal (e.g.,  
17  
18 individualism, masculinity and uncertainty avoidance). These observations may provide some  
19  
20 explanation about how the culture may have contributed to differences and similarities in  
21  
22 preferences for patient-centredness noticed among different countries. This may also  
23  
24 highlight the need for cultural competency for professionals in order to deliver patient-  
25  
26 centred care.<sup>27</sup>  
27  
28  
29

30  
31 **[Figure 2 near here]**  
32  
33  
34

35 It is important to note that the current study focused on self-reported preferences for patient-  
36  
37 centredness and not the actual clinical behaviour. Previous studies have suggested that the  
38  
39 preferences for patient-centredness measured using PPOS correlate well with the actual  
40  
41 clinical behaviour of professionals as measured by verbal exchange between patients and  
42  
43 professionals.<sup>9</sup> However, not much is known about the patients' preferences for hearing  
44  
45 healthcare services and more importantly for 'patient-centred healthcare' within these  
46  
47 countries. Further studies with a qualitative design may help explore these aspects.  
48  
49  
50

### 51 52 53 ***Study Implications and Future Directions*** 54

55 Patient-centredness is important in healthcare as it is linked to patient-outcomes such as  
56  
57 increased satisfaction, adherence and health outcomes<sup>28 29</sup> and also to perceived quality of  
58  
59  
60

1  
2  
3  
4 service delivery.<sup>17</sup> Considering that there is evidence that rehabilitative Audiology patients  
5  
6 also prefer patient-centred care,<sup>10</sup> this concept has direct clinical implications in hearing  
7  
8 healthcare.  
9

10  
11  
12 The current study reports some interesting findings about audiologists' preference to patient-  
13 centredness in different countries. Extrapolating from the above discussion, we may suggest  
14 that the patients in Portugal may have better outcomes when compared to patients in India  
15 and Iran as the Portugal audiologists had high preference for patient-centredness when  
16 compared to audiologists in India and Iran. However, it might be more appropriate to study  
17 patient-centredness of professionals in congruence with patients.<sup>4</sup> For example, although the  
18 mean scores in India and Iran were much less when compared to Portugal, if the patients in  
19 India and Iran have similar preferences for patient-centredness as the professionals then, the  
20 care delivery is likely to meet patients' expectations. Further, it would be useful and  
21 important to understand how the concept of patient-centredness is understood and valued by  
22 both professionals and patients in different countries. If future studies (focussing on both  
23 professionals and patients) suggest marked differences, similar to those demonstrated here, it  
24 may be necessary to reconceptualise the principle of patient-centredness.  
25  
26  
27  
28  
29  
30  
31  
32  
33  
34  
35  
36  
37  
38  
39  
40  
41  
42

43  
44 Given that patient-centredness has been found to be an important factor in patient satisfaction  
45 and outcomes, at least in some countries, and since it has been suggested that clinicians can  
46 learn to become patient-centred,<sup>30</sup> it may be necessary to include such concepts in training  
47 programmes, particularly in cases where practitioners demonstrate a significantly lower  
48 preference towards patient-centredness than their patients. Moreover, future studies may also  
49 focus on understanding the differences and similarities in preferences towards patient-  
50 centredness among sub-cultures within the same country (e.g., different ethnic groups). Such  
51  
52  
53  
54  
55  
56  
57  
58  
59  
60

1  
2  
3  
4 studies may shed some light into arguments of researchers who have been advocating the  
5  
6 need for cultural competence in the delivery of healthcare services.<sup>31</sup> Moreover, this may  
7  
8 have consequences for the increasingly international Audiology workforce,<sup>16</sup> both in terms of  
9  
10 the migration of audiologists to other countries for better job prospects and the provision of  
11  
12 distance-learning models of education. Overall, this information may highlight the need for  
13  
14 optimising hearing healthcare globally.  
15  
16  
17  
18  
19

### 20 ***Strengths and Limitations***

21  
22 A response rate of 76% was obtained for this questionnaire-based study and there was  
23  
24 diversity in the data from audiologists' distributed across three countries. Nevertheless, the  
25  
26 study has some limitations. For example, aspects such as healthcare delivery models and  
27  
28 educational system were not controlled for, but may have contributed to the differences and  
29  
30 similarities noticed in audiologists preferences. However, there was a reasonable spread of  
31  
32 audiologist practicing in public and private Audiology clinics, and audiologists in all three  
33  
34 countries were trained to a minimum standard of a Bachelor's degree. A relatively small  
35  
36 sample size and lack of anonymity in data collection were also limitations of the current  
37  
38 study.  
39  
40  
41  
42  
43

### 44 **Conclusion**

45  
46 The data described here are the first in hearing healthcare to demonstrate specific differences  
47  
48 and similarities in audiologists' preferences for patient-centeredness across countries. Various  
49  
50 factors such as gender, healthcare system, organisational-related factors, ethnicity and cross-  
51  
52 cultural aspects may have contributed to these differences and similarities noticed. These  
53  
54 findings may have implications to training professionals and also to clinical practice in terms  
55  
56 of optimising hearing healthcare across countries.  
57  
58  
59  
60



## Acknowledgements

We gratefully acknowledge Professors Edward Krupat and Louise Hickson for allowing us to use the modified version of the PPOS.

## Contributors

VM - Contributed to most parts of the work including data collection, analysis and writing;

PG - Contributed to data analysis, interpretation and write up; DT - Contributed to data collection and write up; TA - Contributed to data collection and write up; KR - Contributed to data collection and write up.

## Funding

No funding was received to conduct this study.

## Ethical Approval

Ethical approval was obtained from the *School of Allied Health Sciences, Polytechnic Institute of Porto* at Porto and *All India Institute of Speech and Hearing* at Mysore for data collection in Portugal and India respectively. This kind of study did not require ethical approval under the *Department of Audiology, University of Social Welfare and Rehabilitation Sciences* at Tehran for data collection in Iran.

## Data Sharing

No additional data are available.

## Conflict of interests

None.

## References

1. Mead N, Bower P. Patient-centredness: a conceptual framework and review of the empirical literature. *Soc Sci Med* 2000;51:1087-1110.
2. Grenness C, Hickson L, Laplante-Lévesque A, Davidson B. Patient-centredness care: A review for rehabilitative audiologists. *Int J Audiol* 2014;53:S60-67.
3. Michie S, Miles J, Weinman J. Patient-centredness in illness: What is it and does it matter?. *Patient Educ Couns* 2003;51:197-206.
4. Krupat E, Rosenkranz SL, Yeager CM, Barnard K, Putnam SM, Inui TS. The practice orientations of physicians and patients: the effect of doctor-patient congruence on satisfaction. *Patient Educ Couns* 2000;39:49-59.
5. Chan CMH, Azman WA. Attitudes and role orientation on doctor-patient fit and patient satisfaction in cancer care. *Singapore Med J* 2012;53(1):52-56.
6. Hogden A, Greenfield D, Nugus P, Kiernan MC. Engaging in patient decision-making in multidisciplinary care for amyotrophic lateral sclerosis: the views of health professionals. *Patient Prefer Adher* 2012;6:691-701.
7. Umar N, Schollgen I, Terris DD. It is not always about gains: utilities and disutilities associated with treatment features in patients with moderate-to-severe psoriasis. *Patient Prefer Adher* 2012;6:187-184.
8. Levinson W, Roter D, Mullooly J, Frankel R. Physician-patient communication: The relationship with malpractice claims among primary care physicians and surgeons. *J Am Med Assoc* 1997;277:553-559.

- 1  
2  
3  
4 9. Shaw WS, Woiszwillo MJ, Krupat E. Further validation of the Patient-Practitioner  
5  
6 Orientation Scale (PPOS) from recorded visits for back pain. *Patient Educ Couns*  
7  
8 2012;89:288-291.  
9
- 10  
11 10. Laplante-Lévesque A, Hickson L, Worrall L. A qualitative study of shared decision  
12  
13 making in rehabilitative audiology. *J Acad Rehabil Audiol* 2011;43:27-43.  
14
- 15  
16 11. Sweetow RW, Davis A, Hickson L. Paradigm shift in audiology education. *Audiology*  
17  
18 *Today* 2010;Sept/Oct:32-35.  
19
- 20  
21 12. Hickson L. Defining a parading shift. *Sem Hear* 2012;33:3-8.  
22
- 23  
24 13. Grenness C, Hickson L, Laplante-Lévesque A, Davidson B. Patient-centred  
25  
26 audiological rehabilitation: Perspectives of older adults who own hearing aids. *Int J*  
27  
28 *Audiol* 2014;53:S68-75.  
29
- 30  
31 14. Laplante-Lévesque A, Hickson L, Grenness C. An Australian survey of audiologists'  
32  
33 preferences for patient-centredness. *Int J Audiol* 2014;53:S76-82.  
34
- 35  
36 15. Benbassat J, Pilpel D, Tidhar M. Patients' preferences for participation in clinical  
37  
38 decision making. A review of published survey. *Behav Med* 1998;24:81-88.  
39
- 40  
41 16. Goulios H, Patuzzi RB. Audiology education and practice from an international  
42  
43 perspective. *Int J Audiol* 2008;47:647-664.  
44
- 45  
46 17. Saha S, Beach MC, Cooper LA. Patient centredness, cultural competency and  
47  
48 healthcare quality. *J Natl Med Assoc* 2008;100(11):1275-1285.  
49
- 50  
51 18. Zhao F, Manchaiah V, St. Claire L, Danermark B, Jones L, Rajalakshmi K, Goodwin  
52  
53 R. Exploring the influence of culture on hearing help-seeking and hearing aid uptake: a  
54  
55 discussion paper. *Int J Audiol* Submitted.  
56
- 57  
58 19. Krupat E, Putnam SM, Yeager CM. The fit between doctors and patient: Can it be  
59  
60 measures?. *J Gen Intern Med* 1996;11:134.

- 1  
2  
3  
4 20. Beaton DE, Bombardier C, Guillemin F, Ferraz MB. Guidelines for the process of  
5 cross-cultural adaptation of self-report measures. *Spine* 2000;25(24):3186-3191.  
6  
7  
8 21. Tsimtsiou Z, Benos A, Garyfallos AA, Hatzimouratidis D. Predictors of physicians'  
9 attitudes toward sharing information with patients and addressing psychosocial needs:  
10 A cross-sectional study in Greece . *Health Commun* 2012;27:257-263.  
11  
12  
13 22. Kaplan RM, Gandek B, Greenfield S, Rogers W, Ware J. Patient and visit  
14 characteristics related to physicians participatory style: Results from medical outcome  
15 study. *Med Care* 1995;33:1176-1183.  
16  
17  
18 23. Roter D, Hall J. *Doctors talking with patients, Patients talking with doctors*.  
19 Westport: Auburn House, 2006.  
20  
21  
22 24. Cooper LA, Roter D, Johnson RL, Ford DE, Steinwachs DM, et al. Patient-centred  
23 communication, ratings of care, and concordance of patient and physician race. *Ann*  
24 *Intern Med* 2003;139:907-915.  
25  
26  
27 25. Al-Bawardy R, Blatt B, Al-Shohaib S, Simmens SJ. Cross-cultural comparison of the  
28 patient-centredness of the hidden curriculum between a Saudi Arabia and 9 US  
29 medical schools. *Med Educ Online* 2009;14:19. doi: [10.3885/meo.2009.T0000144](https://doi.org/10.3885/meo.2009.T0000144)  
30  
31  
32 26. Hofstede Centre. National Cultural Dimensions. Available from: [http://geert-](http://geert-hofstede.com/dimensions.html)  
33 [hofstede.com/dimensions.html](http://geert-hofstede.com/dimensions.html) (accessed on April 24, 2014).  
34  
35  
36 27. Epner DE, Baile WF. Patient-centred care: the key to cultural competence. *Ann Oncol*  
37 2012;23(S3):33-42.  
38  
39  
40 28. DiMatteo MR, Giordani PJ, Lepper HS, Croghan TW. Patient adherence and medical  
41 treatment outcomes: A meta-analysis. *Med Care* 2002;40:794-811.  
42  
43  
44 29. Swenson SL, Buell S, Zettler P, White M, Ruston DC. et al. Patientcentered  
45 communication: Do patients really prefer it? *J Gen Intern Med* 2004;19:1069-1080.  
46  
47  
48  
49  
50  
51  
52  
53  
54  
55  
56  
57  
58  
59  
60

- 1  
2  
3  
4 30. Lewin S, Skea ZC, Entwistle VA, Zwarenstein M, Dick J. Interventions for providers  
5 to promote a patient-centred approach in clinical consultations. *Cochrane Database*  
6 *Syst Rev* 2009;1:1-60.  
7  
8  
9  
10 31. Campinha-Bacote J. The process of cultural competence in the delivery of healthcare  
11 services: A model of care. *J Transcult Nurs* 2002;13(3):181-184.  
12  
13  
14  
15  
16  
17  
18  
19  
20  
21  
22  
23  
24  
25  
26  
27  
28  
29  
30  
31  
32  
33  
34  
35  
36  
37  
38  
39  
40  
41  
42  
43  
44  
45  
46  
47  
48  
49  
50  
51  
52  
53  
54  
55  
56  
57  
58  
59  
60

## Tables

**Table 1: Demographic information**

|                                               | <b>All<br/>participants<br/>(n=191)</b> | <b>Portugal<br/>(n=55)</b> | <b>India<br/>(n=78)</b> | <b>Iran<br/>(n=58)</b> |
|-----------------------------------------------|-----------------------------------------|----------------------------|-------------------------|------------------------|
| <b>Age in years (Mean±SD)</b>                 | 30.9±8.4                                | 31.0±8.4                   | 29.6±8.6                | 32.5±8.0               |
| <b>Gender (%)</b>                             |                                         |                            |                         |                        |
| ▪ Male                                        | 37                                      | 20                         | 55                      | 30                     |
| ▪ Female                                      | 63                                      | 80                         | 45                      | 70                     |
| <b>Work set-up (%)</b>                        |                                         |                            |                         |                        |
| ▪ Clinic public                               | 35                                      | 23                         | 39                      | 41                     |
| ▪ Clinic private                              | 50                                      | 51                         | 61                      | 33                     |
| ▪ Clinic both                                 | 12                                      | 15                         | 0                       | 26                     |
| ▪ Education                                   | 1                                       | 2                          | 0                       | 0                      |
| ▪ Not known                                   | 2                                       | 9                          | 0                       | 0                      |
| <b>Education (%)</b>                          |                                         |                            |                         |                        |
| ▪ Bachelors                                   | 47                                      | 72                         | 18                      | 60                     |
| ▪ Masters                                     | 48                                      | 22                         | 74                      | 40                     |
| ▪ Doctorate                                   | 5                                       | 6                          | 8                       | 0                      |
| <b>Work experience in years<br/>(Mean±SD)</b> | 7.2±8.1                                 | 7.8±8.2                    | 6.1±8.8                 | 8.1±6.5                |

**Table 2: Modified patient practitioner orientation scale (PPOS): Mean scores and standard deviation**

|                                                                                                                          | All participants<br>(n=191) | Portugal<br>(n=55) | India<br>(n=78) | Iran<br>(n=58) |
|--------------------------------------------------------------------------------------------------------------------------|-----------------------------|--------------------|-----------------|----------------|
| <b>PPOS Items (Mean±SD)</b>                                                                                              |                             |                    |                 |                |
| 1. The audiologist is the one who should decide what gets talked about during an appointment.                            | 2.4±1.1                     | 2.4±1.2            | 2.3±1.2         | 2.5±1.2        |
| 2. Although health care is less personal these days, this is a small price to pay for audiological advances.             | 3.0±1.4                     | 4.3±1.2            | 2.7±1.2         | 2.1±1.0        |
| 3. The most important part of the standard audiological appointment is the hearing test.                                 | 2.7±1.4                     | 3.4±1.2            | 2.5±1.5         | 2.3±1.1        |
| 4. It is often best for clients if they do not have the full explanation of their audiological condition.                | 4.6±1.3                     | 5.0±1.0            | 4.5±1.5         | 4.2±1.3        |
| 5. Clients should rely on their audiologists' knowledge and not try to find out about their conditions on their own.     | 3.2±1.7                     | 4.2±1.4            | 3.4±1.6         | 2.0±1.3        |
| 6. When audiologists ask a lot of questions about a client's background, they are prying too much into personal matters. | 4.4±1.3                     | 5.0±1.0            | 4.0±1.3         | 4.2±1.4        |
| 7. If audiologists are truly good at diagnosis and treatment, the way they relate to clients is not that important.      | 4.8±1.2                     | 5.5±0.7            | 4.4±1.3         | 4.6±1.2        |
| 8. Many clients continue asking questions even though they are not learning anything new.                                | 3.2±1.2                     | 3.4±1.2            | 3.2±1.2         | 3.0±1.2        |
| 9. Clients should be treated as if they were partners with the audiologist, equal in power and status.*                  | 4.1±1.6                     | 4.7±1.6            | 3.7±1.5         | 4.0±1.5        |
| 10. Clients generally want reassurance rather than information about their audiological condition.                       | 2.8±1.1                     | 3.3±1.0            | 2.7±1.1         | 2.5±1.1        |
| 11. If an audiologist's primary tools are being open and warm, the audiologist will not have a lot of success.           | 4.3±1.4                     | 4.6±1.1            | 3.8±1.4         | 4.6±1.3        |

|                                                                                                                                     |         |         |         |         |
|-------------------------------------------------------------------------------------------------------------------------------------|---------|---------|---------|---------|
| 12. When clients disagree with their audiologist, this is a sign that the audiologist does not have the client's respect and trust. | 3.8±1.2 | 4.6±1.0 | 3.7±1.1 | 3.1±1.2 |
| 13. A management plan cannot succeed if it is in conflict with a client's lifestyle or values.*                                     | 4.7±1.1 | 4.7±1.1 | 4.6±1.0 | 4.7±1.2 |
| 14. Most clients want to get in and out of the audiologist's office as quickly as possible.                                         | 3.5±1.4 | 4.4±1.2 | 3.3±1.2 | 2.9±1.3 |
| 15. The client must always be aware that the audiologist is in charge.                                                              | 2.6±1.3 | 2.7±1.2 | 2.4±1.1 | 2.9±1.5 |
| 16. It is not that important to know a client's culture and background in order to treat the client's audiological condition.       | 4.6±1.3 | 5.3±0.9 | 4.3±1.4 | 4.6±1.2 |
| 17. Humour is a major ingredient in the audiologist's management of the client.*                                                    | 4.1±1.3 | 4.8±1.0 | 3.8±1.3 | 3.8±1.4 |
| 18. When clients look up audiological information on their own, this usually confuses more than it helps.                           | 2.9±1.3 | 2.6±1.0 | 2.8±1.4 | 3.4±1.3 |
| <b>PPOS Scales (Mean±SD)</b>                                                                                                        |         |         |         |         |
| ▪ Full scale                                                                                                                        | 3.6±0.6 | 4.2±0.5 | 3.5±0.6 | 3.4±0.4 |
| ▪ Sharing subscale                                                                                                                  | 3.6±0.7 | 4.2±0.6 | 3.4±0.7 | 3.2±0.5 |
| ▪ Caring subscale                                                                                                                   | 3.7±0.6 | 4.1±0.5 | 3.5±0.5 | 3.6±0.5 |

**Note:** Score of 1 (strongly agree) = most clinician-centred; Score of 6 (strongly disagree) = most patient-centred. Items 9, 13 and 17 (\*) are reversely worded items which were reverse scored.



**Table 3: Robust tests of equality of means between countries**

|                   | Welch             |        |         | Brown-Forsythe    |        |         |
|-------------------|-------------------|--------|---------|-------------------|--------|---------|
|                   | Degree of freedom | F-test | P       | Degree of freedom | F-test | P       |
| <b>Sharing</b>    | 122.38            | 46.39  | < 0.001 | 183.46            | 42.14  | < 0.001 |
| <b>Caring</b>     | 119.83            | 27.56  | < 0.001 | 178.20            | 24.86  | < 0.001 |
| <b>Full scale</b> | 122.81            | 47.64  | < 0.001 | 186.33            | 44.78  | < 0.001 |

**Table 4: Differences in audiologists' preferences for patient-centredness between countries**

|                   | Degree of freedom | F-test | P       |
|-------------------|-------------------|--------|---------|
| <b>Sharing</b>    | 2                 | 39.76  | < 0.001 |
| <b>Caring</b>     | 2                 | 24.61  | < 0.001 |
| <b>Full scale</b> | 2                 | 42.49  | < 0.001 |

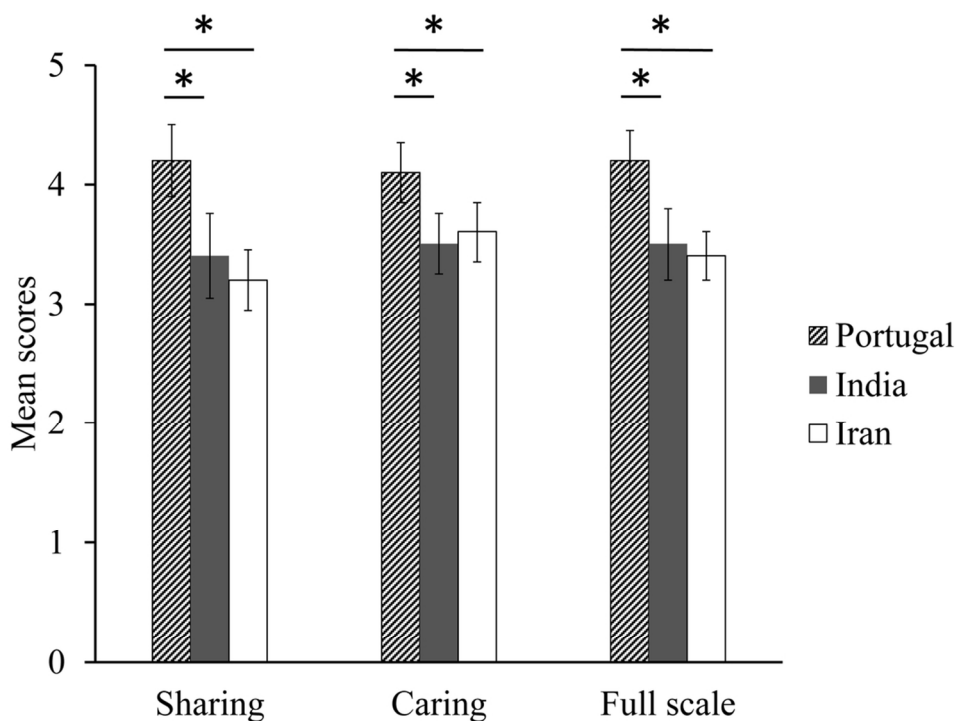

Scores for the 'Sharing' and 'Caring' subscales and the Full scale averaged across respondents for the PPOS questionnaire completed by Audiologists' in Portugal, India and Iran. Error bars represent 1 standard deviation:  
102x76mm (300 x 300 DPI)

Peer Review Only

1  
2  
3  
4  
5  
6  
7  
8  
9  
10  
11  
12  
13  
14  
15  
16  
17  
18  
19  
20  
21  
22  
23  
24  
25  
26  
27  
28  
29  
30  
31  
32  
33  
34  
35  
36  
37  
38  
39  
40  
41  
42  
43  
44  
45  
46  
47  
48  
49  
50  
51  
52  
53  
54  
55  
56  
57  
58  
59  
60

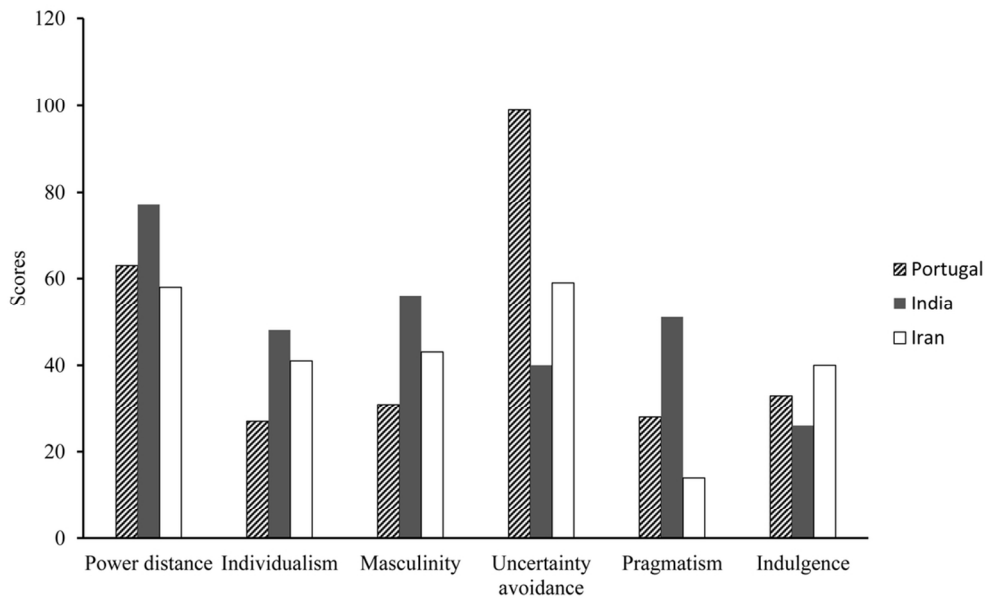

Scores (y-axis) measured for Hofstede's dimensions of national culture (x-axis) in Portugal, India and Iran.  
99x61mm (300 x 300 DPI)

Review only

**STROBE 2007 (v4) checklist of items to be included in reports of observational studies in epidemiology\***  
**Checklist for cohort, case-control, and cross-sectional studies (combined)**

| Section/Topic                | Item # | Recommendation                                                                                                                                                                       | Reported on page # |
|------------------------------|--------|--------------------------------------------------------------------------------------------------------------------------------------------------------------------------------------|--------------------|
| <b>Title and abstract</b>    | 1      | (a) Indicate the study's design with a commonly used term in the title or the abstract                                                                                               | 1                  |
|                              |        | (b) Provide in the abstract an informative and balanced summary of what was done and what was found                                                                                  | 2 & 3              |
| <b>Introduction</b>          |        |                                                                                                                                                                                      |                    |
| Background/rationale         | 2      | Explain the scientific background and rationale for the investigation being reported                                                                                                 | 4 – 6              |
| Objectives                   | 3      | State specific objectives, including any prespecified hypotheses                                                                                                                     | 6                  |
| <b>Methods</b>               |        |                                                                                                                                                                                      |                    |
| Study design                 | 4      | Present key elements of study design early in the paper                                                                                                                              | 7                  |
| Setting                      | 5      | Describe the setting, locations, and relevant dates, including periods of recruitment, exposure, follow-up, and data collection                                                      | 7                  |
| Participants                 | 6      | (a) Give the eligibility criteria, and the sources and methods of selection of participants                                                                                          | 7                  |
| Variables                    | 7      | Clearly define all outcomes, exposures, predictors, potential confounders, and effect modifiers. Give diagnostic criteria, if applicable                                             | 7 – 8              |
| Data sources/<br>measurement | 8*     | For each variable of interest, give sources of data and details of methods of assessment (measurement). Describe comparability of assessment methods if there is more than one group | 7 - 8              |
| Bias                         | 9      | Describe any efforts to address potential sources of bias                                                                                                                            | 7 & 15             |
| Study size                   | 10     | Explain how the study size was arrived at                                                                                                                                            | 7                  |
| Quantitative variables       | 11     | Explain how quantitative variables were handled in the analyses. If applicable, describe which groupings were chosen and why                                                         | 8                  |
| Statistical methods          | 12     | (a) Describe all statistical methods, including those used to control for confounding                                                                                                | 8                  |
|                              |        | (b) Describe any methods used to examine subgroups and interactions                                                                                                                  | 8                  |
|                              |        | (c) Explain how missing data were addressed                                                                                                                                          | NA                 |
|                              |        | (d) If applicable, describe analytical methods taking account of sampling strategy                                                                                                   | 8                  |
|                              |        | (e) Describe any sensitivity analyses                                                                                                                                                | 8                  |
| <b>Results</b>               |        |                                                                                                                                                                                      |                    |

|                          |     |                                                                                                                                                                                                              |         |
|--------------------------|-----|--------------------------------------------------------------------------------------------------------------------------------------------------------------------------------------------------------------|---------|
| Participants             | 13* | (a) Report numbers of individuals at each stage of study—eg numbers potentially eligible, examined for eligibility, confirmed eligible, included in the study, completing follow-up, and analysed            | 9       |
|                          |     | (b) Give reasons for non-participation at each stage                                                                                                                                                         | NA      |
|                          |     | (c) Consider use of a flow diagram                                                                                                                                                                           | NA      |
| Descriptive data         | 14* | (a) Give characteristics of study participants (eg demographic, clinical, social) and information on exposures and potential confounders                                                                     | 9 & 21  |
|                          |     | (b) Indicate number of participants with missing data for each variable of interest                                                                                                                          | NA      |
| Outcome data             | 15* | Report numbers of outcome events or summary measures                                                                                                                                                         | 9 - 11  |
| Main results             | 16  | (a) Give unadjusted estimates and, if applicable, confounder-adjusted estimates and their precision (eg, 95% confidence interval). Make clear which confounders were adjusted for and why they were included | 9 - 11  |
|                          |     | (b) Report category boundaries when continuous variables were categorized                                                                                                                                    | 9 - 11  |
|                          |     | (c) If relevant, consider translating estimates of relative risk into absolute risk for a meaningful time period                                                                                             | 9 - 11  |
| Other analyses           | 17  | Report other analyses done—eg analyses of subgroups and interactions, and sensitivity analyses                                                                                                               | 9 - 11  |
| <b>Discussion</b>        |     |                                                                                                                                                                                                              |         |
| Key results              | 18  | Summarise key results with reference to study objectives                                                                                                                                                     | 11 - 13 |
| Limitations              | 19  | Discuss limitations of the study, taking into account sources of potential bias or imprecision. Discuss both direction and magnitude of any potential bias                                                   | 15      |
| Interpretation           | 20  | Give a cautious overall interpretation of results considering objectives, limitations, multiplicity of analyses, results from similar studies, and other relevant evidence                                   | 13 - 15 |
| Generalisability         | 21  | Discuss the generalisability (external validity) of the study results                                                                                                                                        | 13 - 15 |
| <b>Other information</b> |     |                                                                                                                                                                                                              |         |
| Funding                  | 22  | Give the source of funding and the role of the funders for the present study and, if applicable, for the original study on which the present article is based                                                | 16      |

\*Give information separately for cases and controls in case-control studies and, if applicable, for exposed and unexposed groups in cohort and cross-sectional studies.

**Note:** An Explanation and Elaboration article discusses each checklist item and gives methodological background and published examples of transparent reporting. The STROBE checklist is best used in conjunction with this article (freely available on the Web sites of PLoS Medicine at <http://www.plosmedicine.org/>, Annals of Internal Medicine at <http://www.annals.org/>, and Epidemiology at <http://www.epidem.com/>). Information on the STROBE Initiative is available at [www.strobe-statement.org](http://www.strobe-statement.org).

# BMJ Open

## **Audiologists' preferences for patient-centredness: A cross-sectional questionnaire study of cross-cultural differences and similarities among professionals in Portugal, India and Iran**

|                                 |                                                                                                                                                                                                                                                                                                                                                                                                                             |
|---------------------------------|-----------------------------------------------------------------------------------------------------------------------------------------------------------------------------------------------------------------------------------------------------------------------------------------------------------------------------------------------------------------------------------------------------------------------------|
| Journal:                        | <i>BMJ Open</i>                                                                                                                                                                                                                                                                                                                                                                                                             |
| Manuscript ID:                  | bmjopen-2014-005915.R1                                                                                                                                                                                                                                                                                                                                                                                                      |
| Article Type:                   | Research                                                                                                                                                                                                                                                                                                                                                                                                                    |
| Date Submitted by the Author:   | 26-Jul-2014                                                                                                                                                                                                                                                                                                                                                                                                                 |
| Complete List of Authors:       | Manchaiah, Vinaya; Anglia Ruskin University, Department of Vision and Hearing Sciences<br>Gomersall, Philip; Anglia Ruskin University, Department of Vision and Hearing Sciences<br>Tomé, David; Polytechnic Institute of Porto, Audiology<br>Ahmadi, Tayebeh; University of Social Welfare and Rehabilitation Sciences, Audiology<br>Krishna, Rajalakshmi; University of Mysore, All India Institute of Speech and Hearing |
| <b>Primary Subject Heading</b>: | Patient-centred medicine                                                                                                                                                                                                                                                                                                                                                                                                    |
| Secondary Subject Heading:      | Ear, nose and throat/otolaryngology                                                                                                                                                                                                                                                                                                                                                                                         |
| Keywords:                       | Audiology < OTOLARYNGOLOGY, International health services < HEALTH SERVICES ADMINISTRATION & MANAGEMENT, MEDICAL EDUCATION & TRAINING                                                                                                                                                                                                                                                                                       |
|                                 |                                                                                                                                                                                                                                                                                                                                                                                                                             |

SCHOLARONE™  
Manuscripts

1  
2  
3  
4 **Audiologists' preferences for patient-centredness: A cross-**  
5  
6  
7 **sectional questionnaire study of cross-cultural differences and**  
8  
9  
10 **similarities among professionals in Portugal, India and Iran**  
11  
12  
13

14 **Vinaya Manchaiah<sup>1,2</sup>, Philip A. Gomersall<sup>1</sup>, David Tomé<sup>3</sup>, Tayebeh Ahmadi<sup>4</sup> &**  
15 **Rajalakshmi Krishna<sup>5</sup>**  
16  
17

- 18  
19  
20 1. Department of Vision and Hearing Sciences, Anglia Ruskin University, Cambridge,  
21 United Kingdom  
22  
23 2. Linnaeus Centre HEAD, Department of Behavioral Sciences and Learning, The  
24 Swedish Institute for Disability Research, Linköping University, Linköping, Sweden  
25  
26 3. Department of Audiology, School of Allied Health Sciences, Polytechnic Institute of  
27 Porto, Vila Nova de Gaia, Portugal  
28  
29 4. Department of Audiology, University of Social Welfare and Rehabilitation Sciences,  
30 Tehran, Iran  
31  
32 5. All India Institute of Speech and Hearing, University of Mysore, Mysore, India  
33  
34  
35  
36  
37  
38  
39  
40  
41

42 **Corresponding Author:** Philip A. Gomersall

43  
44 **Address:** Department of Vision and Hearing Sciences, Coslett 204, Anglia Ruskin  
45 University, Cambridge CB1 1PT, United Kingdom  
46

47  
48 **Email:** [phil.gomersall@anglia.ac.uk](mailto:phil.gomersall@anglia.ac.uk); **Tel:** +44 (0)1223 698653  
49

50  
51 **Key Words**

52  
53 Patient-centeredness, Audiology, hearing healthcare, cross-culture  
54  
55  
56  
57  
58  
59  
60



## Abstract

**Objective:** Patient-centredness has become one of the important aspects of health service delivery, however, a limited number of studies exist that focus on this concept in the domain of hearing healthcare. The objective of this study was to examine and compare audiologists' preferences for patient-centredness in Portugal, India and Iran.

**Design:** The study used a cross-sectional survey design with audiologists recruited from three different countries.

**Participants:** A total of 191 fully-completed responses were included in the analysis (55 from Portugal, 78 from India and 58 from Iran).

**Main outcome measure:** The Patient-Practitioner Orientation Scale.

**Results:** Patient-Practitioner Orientation Scale mean scores suggest that Audiologists have a preference for patient-centredness (i.e., mean of 3.6 in 5 point scale). However, marked differences were observed between specific PPOS items suggesting these preferences vary across clinical situations. A significant level of difference ( $p < 0.001$ ) was found between audiologists' preferences for patient-centredness in three countries. Audiologists in Portugal had a greater preference for patient-centredness when compared to audiologists in India and Iran, although no significant differences were found in terms of age and duration of experience among these sample populations.

**Conclusion:** There are differences and similarities in audiologists' preferences for patient-centredness among countries. These findings may have implications for the training of professionals and also for clinical practice in terms of optimising hearing healthcare across countries.

## Summary

### Article Focus

- To examine and compare audiologists' preferences for patient-centredness in Portugal, India and Iran.

### Key Message

- A significant level of difference was found between audiologists' preferences for patient-centredness in three countries.
- Audiologists in Portugal had a greater preference for patient-centredness when compared to audiologists in India and Iran.
- These findings may have implications for the training of professionals and for clinical practice in terms of optimising hearing healthcare across countries.

### Strengths and Weakness

- A response rate of 76% was obtained for this questionnaire-based study and there was diversity in the data from audiologists distributed across three countries.
- Some variables such as healthcare delivery models and educational system were not controlled for, but may have contributed to the differences and similarities noticed in audiologists preferences.
- A sampling bias may have been present, since audiologists with particular preferences may have been more inclined to respond to the questionnaire.
- The fact that identifiable information may have been present in the emailed responses had the potential to influence/discourage an individual's response.

## Introduction

There has been an increase in advocacy towards patients' involvement in their health and care delivery, hence the concept 'patient-centredness' has received much attention over the past few decades.<sup>1</sup> Patient-centredness involves aspects such as increased importance placed on patient participation, self-determination of patients in their healthcare, and the creation of a power-balanced therapeutic relationship between patients and professionals.<sup>2</sup> Although there has been little consensus over the meaning of this concept universally, patient-centredness has been described with five main dimensions: (1) biopsychosocial perspective; (2) patient as a person; (3) shared power and responsibility; (4) therapeutic alliance; and (5) clinician as a person.<sup>1</sup> Patient-centredness has been suggested to be fundamental part of the successful management of chronic health conditions.<sup>3</sup>

Studies from a variety of areas of healthcare have suggested that the health professional's preferences towards patient-centredness is important in determining outcomes and patient satisfaction.<sup>4-7</sup> Issues surrounding patient-centred care have also been linked to malpractice claims,<sup>8</sup> and in general a preference for patient-centeredness correlates well with good clinical practices.<sup>9</sup>

The profession of Audiology is particularly interesting in this context since, traditionally, there has been a focus on the technological aspects of hearing healthcare. Some researchers believe that the last two decades has seen a paradigm shift; moving from a focus on the technological aspects of hearing healthcare to a more person-centred approach to rehabilitation.<sup>10 11</sup> The empirical evidence for this shift is limited, with only a small number of published studies on patient-centredness specific to audiology.<sup>12 13</sup> Laplante-Lévesque et al

1  
2  
3  
4 conducted a qualitative study, exploring shared decision making in adults with acquired  
5 hearing impairment, which suggested that patients wanted rehabilitative audiologists to hear  
6 their experiences and preferences and to tailor their interventions accordingly.<sup>14</sup> Poost-  
7  
8  
9  
10  
11 Foroosh et al.<sup>15</sup> studied the factors in the interaction between Audiologists and clients in the  
12 decision to purchase a hearing aid. The study asked twelve clients with acquired hearing loss  
13 and ten audiologists, from both University and private practices, to supply statements  
14 regarding which clinician-patient factors they felt influenced the decision to purchase a  
15 hearing aid. Client-centred interaction was identified as one of two major themes in the  
16 responses provided (client-empowerment was the other).  
17  
18  
19  
20  
21  
22  
23

24  
25  
26 Grenness et al.<sup>12</sup> studied the views of older adults who own hearing aids in order to further  
27 define patient-centred care in the context of audiological rehabilitation. Interviews were  
28 conducted with ten older adults with hearing aids, exploring their views and the data were  
29 analysed using qualitative content analysis. The results suggested three dimensions: (1) the  
30 therapeutic relationship; (2) the players - patient and audiologist; and (3) the clinical process,  
31 and an overarching theme of individualised care specific to audiological rehabilitation. In  
32 each case, the research discussed above demonstrates the significant value that patients place  
33 in the relationship with the clinician. The reader is referred to a recent literature review by  
34 Grenness et al.<sup>2</sup> for further details on patient-centred care in relation to rehabilitative  
35  
36  
37  
38  
39  
40  
41  
42  
43  
44  
45  
46  
47  
48  
49  
50  
51  
52  
53  
54  
55  
56  
57  
58  
59  
60  
Audiology.

51  
52  
53  
54  
55  
56  
57  
58  
59  
60  
A recent study focussing specifically on Audiologists in Australia found a high preference  
for patient-centredness.<sup>13</sup> Moreover, demographic factors such as age, duration of work  
experience and employment type (i.e., public/ private) acted as influencing factors towards  
explaining patient-centredness. For example, older audiologists and those who had practiced

1  
2  
3  
4 longer had a significantly greater preference to patient-centredness when compared to  
5  
6 younger and less-experienced audiologists. This is the only published study that has explicitly  
7  
8 explored audiologists' preferences towards patient-centredness. As a consequence, it is  
9  
10 unknown if audiologists in other countries would display similar preferences. Given that  
11  
12 Audiology practices vary considerably across countries,<sup>16</sup> it would be useful to examine  
13  
14 audiologists' preferences for patient-centeredness across different countries which vary in  
15  
16 terms of culture and healthcare systems. Moreover; it has been highlighted in general that  
17  
18 there are few cross-cultural studies in the area of hearing healthcare, highlighting the need for  
19  
20 such studies.  
21  
22

23  
24 Cultural competence is a key aspect that is known to influence healthcare quality<sup>17 18</sup>. We  
25  
26 hypothesise that cultural aspects can influence both patients' and providers' preferences in  
27  
28 healthcare and towards patient-centredness. We were particularly interested in understanding  
29  
30 and comparing the preferences for patient-centeredness among Audiologists in European and  
31  
32 Asian countries. Asian countries, compared to European countries, are considered to be more  
33  
34 collectivist societies, with a greater emphasis placed on the role of the individual as part of a  
35  
36 local group and/or community with less of a tendency to focus on 'looking after oneself'.  
37  
38 Further to this, it has been posited that Asian countries have a tendency towards a high  
39  
40 'power distance' within levels of organisations – this reflects how willing the less powerful  
41  
42 members of an organisation or group are to accept an unequal distribution of power. In the  
43  
44 context of patient-centredness such cultural effects might result in different opinions towards  
45  
46 a hierarchical 'paternalistic' approach to audiological management, versus a patient centred-  
47  
48 approach.  
49  
50  
51  
52  
53  
54  
55  
56  
57  
58  
59  
60

1  
2  
3  
4 The aim of the current study was to examine and compare audiologists' preferences for  
5  
6 patient-centredness in Portugal, India and Iran. These countries vary in terms of healthcare  
7  
8 system, culture and socio-economic status. However, they were chosen as they all have a  
9  
10 minimum educational level requirement of a Bachelor's degree education for Audiologists,  
11  
12 and also due to convenience in data collection.  
13

## 14 **Method**

### 15 *Ethical Considerations*

16  
17  
18 Ethical approval was obtained from the *School of Allied Health Sciences, Polytechnic*  
19  
20 *Institute of Porto* at Porto and *All India Institute of Speech and Hearing* at Mysore for data  
21  
22 collection in Portugal and India respectively. This kind of study did not require ethical  
23  
24 approval under the *Department of Audiology, University of Social Welfare and Rehabilitation*  
25  
26 *Sciences* at Tehran for data collection in Iran.  
27  
28  
29  
30  
31  
32

### 33 *Study Design and Participants*

34  
35 The current study used a cross-sectional survey design and purposive sampling to recruit  
36  
37 participants. The email mailing list was obtained from university and professional  
38  
39 associations which consisted of audiologists distributed throughout each of the three  
40  
41 countries. The Patient-Practitioner Orientation Scale (PPOS) questionnaire, with some  
42  
43 additional demographics questions (i.e., age, gender, number of years of experience, work  
44  
45 set-up, country of origin and country in which currently practicing), was sent to 260  
46  
47 Audiologists (80 in Portugal, 110 in India and 70 in Iran) via email, requesting them to  
48  
49 complete and return back to the researcher by email. Two email reminders were sent for non-  
50  
51 respondents after two and four weeks respectively. As the Email ID might have contained  
52  
53 some information that may have helped identify the individual, the survey was not fully  
54  
55 anonymous. In the interest of keeping the survey short, only limited demographic information  
56  
57  
58  
59  
60

1  
2  
3  
4 was requested and the choice was made to consider the most important aspects based on  
5  
6 previous studies.  
7  
8  
9

### 10 **Questionnaire**

11  
12 The PPOS was developed by Krupat et al.<sup>19</sup> to study physician preferences towards patient-  
13 centredness. However, a modified version of the PPOS that has previously been used to study  
14 audiologists' preferences towards patient-centredness was used in the current study.<sup>13</sup> This  
15 modified version of the PPOS was found to have acceptable internal consistency ( $\alpha=0.78$ ).  
16  
17 This scale has eighteen questions which are scored on a 6-point Likert scale (1 = strongly  
18 agree; 6 = strongly disagree). The total score ranges from 18 (most patient-centred) to 108  
19 (most audiologist-centred), and there are two sub-scales: The first nine-item sub-scale,  
20  
21 *sharing*, reflects the extent to which the respondent believes that patients desire information  
22 and should be part of the decision making process (e.g., patients should be treated as if they  
23 were partners with the audiologists, equal in power and status). The other nine-item sub-  
24 scale, *caring*, reflects the extent to which the respondent sees the patient's expectations,  
25 feelings, and life circumstances as critical elements in the treatment process (e.g., a treatment  
26 plan cannot succeed if it is in conflict with a patient's lifestyle or values).  
27  
28  
29  
30  
31  
32  
33  
34  
35  
36  
37  
38  
39  
40  
41  
42  
43

44 An English version of the questionnaire was administered in India. Portuguese and Farsi  
45 translated versions were used in Portugal and Iran respectively. The questionnaire translation  
46 process was aimed at achieving different language versions of the English instrument that are  
47 conceptually equivalent in each of the target countries/cultures. That is, the focus was on  
48 cross-cultural and conceptual, rather than on linguistic/literal equivalence. We followed the  
49 well accepted forward-translations and back-translations method.<sup>20</sup> This process involved  
50  
51  
52  
53  
54  
55  
56  
57  
58  
59  
60

1  
2  
3  
4 four main stages: forward translation; expert back translation; review and resolution of any  
5  
6 discrepancies; and pre-testing with five participants each, in both Portugal and Iran.  
7  
8  
9

### 10 **Data Analysis**

11  
12 In the first instance, descriptive statistics (i.e., mean, standard deviation), a test of normality  
13  
14 and a test of homogeneity of variance were performed. Mean total PPOS scores for  
15  
16 audiologists from three countries were compared using an independent one-way analysis of  
17  
18 variance (ANOVA). An alpha level of 0.01 was used to determine significance. Bonferroni  
19  
20 *post-hoc* analysis was performed to further examine the relationship between groups. Further,  
21  
22 a one-way analysis of covariance (ANCOVA) was performed with age and duration of work  
23  
24 experience as covariates in order to exclude the influence of these variables on the observed  
25  
26 differences between the group means.  
27  
28  
29  
30  
31  
32

### 33 **Results**

34  
35 A total of 198 responses (response rate of 76%) were received. This included: 55 responses  
36  
37 from Portugal (response rate of 69%); 82 responses from India (response rate of 75%); and  
38  
39 61 responses from Iran (response rate of 87%). However, three responses from Iran  
40  
41 (incomplete data) and four responses from India (audiologists currently practicing in a  
42  
43 different country) were excluded. A total of 191 responses (i.e., 73%) were included in the  
44  
45 analysis (55 from Portugal, 78 from India and 58 from Iran). Table 1 presents the  
46  
47 demographic information and Table 2 presents PPOS scores. ANOVA showed no difference  
48  
49 between groups in terms of age [ $F(2, 188) = 2.13, p = 0.121$ ] and also duration of work  
50  
51 experience [ $F(2, 188) = 1.16, p = 0.313$ ].  
52  
53  
54

55 [Table 1 near here]

56  
57 [Table 2 near here]  
58  
59  
60



1  
2  
3  
4  
5  
6 Data for both full-scale and subscales were found to be normally distributed (based on  
7  
8 Kolmogorov-Smirnov test and visual examination of histograms). Homogeneity of variances  
9  
10 (based on Levene's test) was found for *caring* and *total mean* ( $p = 0.625$  and  $0.129$   
11  
12 respectively) and not for *sharing* ( $p = 0.020$ ). Since our data were found to be normally  
13  
14 distributed, we elected to use ANOVA for our analysis, despite the fact that homogeneity of  
15  
16 variances could not be assumed for the *sharing* subscale. A robust procedures (Welch and  
17  
18 Brown-Forsythe) test was performed to check ANOVA findings which indicated the same  
19  
20 significant differences between group means ( $p < 0.001$  in all cases).  
21  
22

23  
24  
25  
26 The PPOS mean scores from each population were analysed using a one way between-  
27  
28 subjects ANOVA (see Table 3). A significant result was found for *sharing* subscale [ $F(2,$   
29  
30  $188) = 39.76$ ], *caring* subscale [ $F(2, 188) = 24.61$ ] and the *full scale* [ $F(2, 188) = 42.49$ ].  
31  
32 Further, *post-hoc* tests with Bonferroni correction showed that the difference between  
33  
34 Portugal and India and also Portugal and Iran were significant for *sharing* subscale, *caring*  
35  
36 subscale and *full scale* ( $p = 0.001, 0.001$  and  $0.001$  respectively). However, the difference  
37  
38 between India and Iran were not statistically significant for the *sharing* subscale, *caring*  
39  
40 subscale and *full scale* ( $p = 0.171, p=0.841$  and  $p=1$  respectively).  
41  
42  
43  
44  
45

46 **[Table 3 near here]**  
47  
48  
49

50  
51 These results show some differences and some similarities in audiologists' preferences  
52  
53 towards patient-centredness from different countries (see Figure 1). Audiologists in Portugal  
54  
55 had significantly greater preference for patient-centredness when compared to audiologists in  
56  
57 India and Iran whose preferences did not differ much.  
58  
59  
60

[Figure 1 near here]

Whilst our sample populations were well matched, with no significant differences with respect to age and experience, this does not exclude some possible influence of these variables on the data. Therefore we elected to include these variables as covariates, and assess if this had an influence on the main effect observed: The data met the necessary assumptions (i.e., linearity, homoscedasticity and homogeneity of regression slopes) and the ANCOVA results with age and duration of work experience as covariates and PPOS scores as dependent variable gave results consistent with the ANOVA, with a significant main effect for the full scale and subscales only and no significant interaction was observed. Thus we conclude that differences exist between the responses from audiologists from these countries in preference for patient-centredness, even after accounting for age and duration of work experience.

## Discussion

This study examined and compared audiologists' preferences for patient-centredness in Portugal, India and Iran. The PPOS scores indicate the self-reported preference for aspects of patient-centredness. An overall mean score greater than 3 for all three countries included suggests that there is a tendency for Audiologists to favour patient-centredness, rather than a clinician-centred approach. This is true for both *caring* and *sharing* subscales. These values can be compared to those observed across other medical specialities.<sup>5</sup> For example, general practitioners and oncology physicians had higher PPOS mean scores (i.e., 4.3 and 5.0 respectively) when compared with physicians with a surgical background (i.e., 2.9). Thus it appears that the training route and specific duties of the professional could be considered as factors in determining patient-centred practice.

1  
2  
3  
4  
5  
6 From examination of the responses to each item it can be seen that audiologists' preferences  
7  
8 for patient-centredness vary depending upon the situation described (see Table 2). There is  
9  
10 some grouping of item responses, for example, mean PPOS score 2.4 in *item 1* (i.e.,  
11  
12 audiologist is the one who should decide what gets talked about during an appointment), 2.7  
13  
14 in *item 2* (i.e., most important part of the standard audiological appointment is the hearing  
15  
16 test), 2.8 in *item 10* (i.e., clients generally want reassurance rather than information about  
17  
18 their audiological condition) and 2.6 in *item 15* (i.e., client must always be aware that the  
19  
20 audiologist is in charge). These were markedly lower than the mean PPOS scores of 4.6 in  
21  
22 *item 4* (i.e., it is often best for clients if they do not have the full explanation of their  
23  
24 audiological condition), 4.8 in *item 7* (i.e., if audiologists are truly good at diagnosis and  
25  
26 treatment, the way they relate to clients is not that important) and 4.7 in *item 13* (i.e., a  
27  
28 management plan cannot succeed if it is in conflict with a client's lifestyle or values). Similar  
29  
30 results have been reported in a recent Australian study.<sup>14</sup> These observations suggest that the  
31  
32 preference for patient centredness is consistent across particular situations. Generally,  
33  
34 audiologists prefer more control during the clinical appointment and like to decide what  
35  
36 information has the priority of discussion and also prefer to have audiological tests as the  
37  
38 central focus of the clinical appointment. This maybe because of the fact that traditionally  
39  
40 audiological practice had a greater emphasis on technology and many audiologists followed  
41  
42 more of a prescriptive approach to management. However, some researchers suggest that  
43  
44 there is a growing trend towards audiological practice with more emphasis on client-centred  
45  
46 rehabilitation.<sup>10, 11</sup> Therefore; it may be useful to monitor Audiologists preferences for  
47  
48 patient-centredness over time.

49  
50 The study results suggest some country-specific differences and some similarities in  
51  
52 preferences for patient-centredness among audiologists from Portugal ( $M = 4.2$ ;  $SD = 0.5$ ),  
53  
54  
55  
56  
57  
58  
59  
60

1  
2  
3  
4 India ( $M = 3.5$ ;  $SD = 0.6$ ) and Iran ( $M = 3.4$ ;  $SD = 0.4$ ). Generally, audiologists' in Portugal  
5  
6 had a high preference for patient-centredness, when compared to audiologists in India and  
7  
8 Iran. Moreover, a recent study found that Australian audiologists<sup>14</sup> have high preference for  
9  
10 patient-centredness ( $M = 4.46$ ;  $SD = 0.52$ ), which is similar to Portugal audiologists'  
11  
12 preferences reported in the current study.  
13

14  
15  
16  
17  
18 When comparing scores across countries the trend for higher PPOS scores provided by  
19  
20 audiologists from Portugal compared to their peers from India and Iran, was true for almost  
21  
22 all questionnaire items when analysed individually. However, some variations exist. For  
23  
24 example, scores for *item 1* (i.e., audiologist is the one who should decide what gets talked  
25  
26 about during an appointment), was similar among audiologists in all three countries. This  
27  
28 might reflect a similarity in service delivery that place restricted time allowances on clinical  
29  
30 session that would encourage the Audiologist to keep conversation 'on task'. Scores for *item*  
31  
32 *18* (i.e., when clients look up audiological information on their own, this usually confuses  
33  
34 more than it helps) followed the reverse trend with audiologists in India and Iran scoring  
35  
36 higher than audiologists in Portugal, albeit by relatively small differences in score. In this  
37  
38 case, the ability of the patient population to find relevant information may be related to local  
39  
40 factors such as internet access and language-specific information resources. *Item 2* had the  
41  
42 largest difference in score between Portugal and the other two countries (i.e., Although health  
43  
44 care is less personal these days, this is a small price to pay for audiological advances). The  
45  
46 responses could have been influenced by how the respondent views recent audiological  
47  
48 advances. Improvements in technology have occurred at different times in different countries,  
49  
50 and therefore it may be that audiologist's responses are reflecting their opinion on which  
51  
52 technological advancements they feel have helped clients, as much reflecting their opinion on  
53  
54  
55  
56  
57  
58  
59  
60

1  
2  
3  
4 the changing personal aspect of healthcare. An example would be if the move from analogue  
5  
6 to digital technology was more recent for India and Iran; this may be valued more highly  
7  
8 against a loss of the personal involvement in healthcare than in Portugal, if this development  
9  
10 had occurred further in the past. .

11  
12  
13  
14  
15 Studies from other disciplines have shown that the PPOS scores indicating preference for  
16  
17 patient-centredness can vary among professionals in different countries. For example,  
18  
19 medical practitioners' mean PPOS scores of 4.8 in the USA,<sup>4</sup> compared to 3.3 in Greece.<sup>21</sup>,  
20  
21

22  
23  
24 The key influencing factors for the differences observed are the local healthcare system,  
25  
26 national culture, organisational-related factors (see Grenness et al.<sup>2</sup>), ethnicity<sup>22</sup> and cross-  
27  
28 cultural aspects<sup>23</sup> as indicated in studies from other areas. We hypothesise that one of the  
29  
30 main contributing factors could be the 'culture'. Geert Hofstede defines culture as '*the*  
31  
32 *collective programming of the mind distinguishing the members of one group or category of*  
33  
34 *people from another*'.<sup>24</sup> Figure 2 represents Hofstede's dimensions of national culture in  
35  
36 Portugal, India and Iran, which include: power distance; individualism; masculinity;  
37  
38 uncertainty avoidance; pragmatism; and indulgence.<sup>24</sup> A greater number of similarities are  
39  
40 noticed between India and Iran when compared to Portugal (e.g., individualism, masculinity  
41  
42 and uncertainty avoidance). These observations are consistent with a contribution of culture  
43  
44 to differences and similarities in preferences for patient-centredness noticed among different  
45  
46 countries in this study. It would also be consistent with the previously reported findings of  
47  
48 medical practitioners from the USA, a country with a very high score of Individualism,  
49  
50 compared to Greece, considered to be a collectivist culture. Given this finding, we argue that  
51  
52 there is a need for increased focus on cultural competency for professionals in order to  
53  
54 deliver patient-centred care.<sup>25</sup>  
55  
56  
57  
58  
59  
60

**[Figure 2 near here]**

It is important to note that the current study focused on self-reported preferences for patient-centredness and not the actual clinical behaviour. Previous studies have suggested that the preferences for patient-centredness measured using PPOS correlate well with the actual clinical behaviour of professionals as measured by verbal exchange between patients and professionals.<sup>9</sup> However, not much is known about the patients' preferences for hearing healthcare services and more importantly for 'patient-centred healthcare' within these countries. Further studies with a qualitative design may help explore these aspects. A further consideration is to what extent the clinician population will reflect the general 'culture' that is assigned to a nation- it is likely that they vary from the general population with regards educational level in addition to other socioeconomic factors, and the degree of difference is likely to be specific to the particular profession, and also country being considered. However, we also consider it unlikely that there is no influence of country-specific cultural factors on the clinician population at all.

Other potential influences on audiologists' preferences for patient centredness are age, duration of work experience and employment type.<sup>13</sup> In the current study no significant differences existed between groups in terms of age and duration of work experience. The distribution of audiologists among different areas of employment was broadly similar between countries. However, differences were noted in terms of participants' gender between countries. The estimates of male/female ratio practicing in Audiology in these countries, as indicated by the professional bodies, are 1:4, 1:2 and 1:2 in Portugal, India and Iran respectively. The current study sample had a similar gender pattern of audiologists even though not exactly matching these ratios. Gender has been found to influence the

1  
2  
3  
4 practitioners' preference for patient-centredness with women displaying a greater preference  
5  
6 for patient-centredness than male counterparts,<sup>26 27</sup> although this was not found to be a  
7  
8 significant factor for audiologists' preferences for patient-centredness in a large scale  
9  
10 Australian study.<sup>13</sup> Hence, further exploration of a gender effect in preference for patient-  
11  
12 centredness is necessary in future studies.

### 13 14 15 16 17 ***Study Implications and Future Directions***

18  
19 Patient-centredness is important in healthcare as it is linked to patient-outcomes such as  
20  
21 increased satisfaction, adherence and health outcomes<sup>28 29</sup> and also to perceived quality of  
22  
23 service delivery.<sup>18</sup> Considering that there is evidence that rehabilitative Audiology patients  
24  
25 also prefer patient-centred care,<sup>14</sup> this concept has direct clinical implications in hearing  
26  
27 healthcare.  
28  
29

30  
31  
32  
33 The current study reports some interesting findings about audiologists' preference to patient-  
34  
35 centredness in different countries. Extrapolating from the above discussion, we may suggest  
36  
37 that the patients in Portugal may have better outcomes when compared to patients in India  
38  
39 and Iran as the Portugal audiologists had high preference for patient-centredness when  
40  
41 compared to audiologists in India and Iran. However, it might be more appropriate to study  
42  
43 patient-centredness of professionals in congruence with patients.<sup>4</sup> For example, although the  
44  
45 mean scores in India and Iran were lower than those of Portugal, if the patients in India and  
46  
47 Iran have similar preferences for patient-centredness as the professionals then, the care  
48  
49 delivery is likely to meet patients' expectations. Further, it would be useful and important to  
50  
51 understand how the concept of patient-centredness is understood and valued by both  
52  
53 professionals and patients in different countries. If future studies (focussing on both  
54  
55  
56  
57  
58  
59  
60

1  
2  
3  
4 professionals and patients) suggest marked differences, similar to those demonstrated here, it  
5  
6 may be necessary to reconceptualise the principle of patient-centredness.  
7  
8  
9

10 Given that patient-centredness has been found to be an important factor in patient satisfaction  
11 and outcomes, at least in some countries, and since it has been suggested that clinicians can  
12 learn to become patient-centred,<sup>30</sup> it may be necessary to include such concepts in training  
13 programmes, particularly in cases where practitioners demonstrate a significantly lower  
14 preference towards patient-centredness than their patients. Moreover, future studies may also  
15 focus on understanding the differences and similarities in preferences towards patient-  
16 centredness among sub-cultures within the same country (e.g., different ethnic groups). Such  
17 studies may shed some light into arguments of researchers who have been advocating the  
18 need for cultural competence in the delivery of healthcare services.<sup>31</sup> Moreover; this may  
19 have consequences for the increasingly international Audiology workforce,<sup>16</sup> both in terms of  
20 the migration of audiologists to other countries for better job prospects and the provision of  
21 distance-learning models of education. Overall, this information may highlight the need for  
22 optimising hearing healthcare globally.  
23  
24  
25  
26  
27  
28  
29  
30  
31  
32  
33  
34  
35  
36  
37  
38  
39  
40

### 41 ***Strengths and Limitations***

42  
43 A response rate of 76% was obtained for this questionnaire-based study and there was  
44 diversity in the data from audiologists' distributed across three countries. Nevertheless, the  
45 study has some limitations. For example, aspects such as healthcare delivery models and  
46 educational system were not controlled for, but may have contributed to the differences and  
47 similarities noticed in audiologists preferences. However, there was a reasonable spread of  
48 audiologist practicing in public and private Audiology clinics, and audiologists in all three  
49 countries were trained to a minimum standard of a Bachelor's degree. A relatively small  
50  
51  
52  
53  
54  
55  
56  
57  
58  
59  
60



1  
2  
3  
4 sample size and lack of anonymity in data collection were also limitations of the current  
5  
6 study. We were aware that a sampling bias may have been present, since audiologists with  
7  
8 particular preferences may have been more inclined to respond to the questionnaire. The fact  
9  
10 that identifiable information may have been present in the emailed responses had the  
11  
12 potential to influence/discourage an individual's response. These biases would have been  
13  
14 present for all countries.  
15  
16  
17  
18  
19

## 20 **Conclusion**

21  
22 The data described here are the first in hearing healthcare to demonstrate specific differences  
23  
24 and similarities in audiologists' preferences for patient-centeredness across three countries.  
25  
26 We observed that the two countries with the most similar cultural profile had the most similar  
27  
28 preference level for patient-centred care. There are several factors might influence preference  
29  
30 for patient centred-practice, and further investigation is required in order to determine the role  
31  
32 of the education and healthcare system, organisational-related factors, and ethnicity in  
33  
34 contributing to the differences and similarities noticed. Clinician reported Patient-  
35  
36 centredness and the cultural aspects of the clinician and patient population are different  
37  
38 across countries and this may have implications for the training professionals and  
39  
40 implementation of clinical practice in terms of optimising hearing healthcare across countries.  
41  
42  
43  
44  
45  
46  
47  
48  
49  
50  
51  
52  
53  
54  
55  
56  
57  
58  
59  
60

## Acknowledgements

We gratefully acknowledge Professors Edward Krupat and Louise Hickson for allowing us to use the modified version of the PPOS.

## Contributors

VM - Contributed to most parts of the work including data collection, analysis and writing;

PG - Contributed to data analysis, interpretation and write up; DT - Contributed to data collection and write up; TA - Contributed to data collection and write up; KR - Contributed to data collection and write up.

## Funding

No funding was received to conduct this study.

## Ethical Approval

Ethical approval was obtained from the *School of Allied Health Sciences, Polytechnic Institute of Porto* at Porto and *All India Institute of Speech and Hearing* at Mysore for data collection in Portugal and India respectively. This kind of study did not require ethical approval under the *Department of Audiology, University of Social Welfare and Rehabilitation Sciences* at Tehran for data collection in Iran.

## Data Sharing

No additional data are available.

## Conflict of interests

None.

## References

1. Mead N, Bower P. Patient-centredness: a conceptual framework and review of the empirical literature. *Soc Sci Med* 2000;51:1087-1110.
2. Grenness C, Hickson L, Laplante-Lévesque A, Davidson B. Patient-centredness care: A review for rehabilitative audiologists. *Int J Audiol* 2014;53:S60-67.
3. Michie S, Miles J, Weinman J. Patient-centredness in illness: What is it and does it matter?. *Patient Educ Couns* 2003;51:197-206.
4. Krupat E, Rosenkranz SL, Yeager CM, Barnard K, Putnam SM, Inui TS. The practice orientations of physicians and patients: the effect of doctor-patient congruence on satisfaction. *Patient Educ Couns* 2000;39:49-59.
5. Chan CMH, Azman WA. Attitudes and role orientation of doctor-patient fit and patient satisfaction in cancer care. *Singapore Med J* 2012;53(1):52-56.
6. Hogden A, Greenfield D, Nugus P, Kiernan MC. Engaging in patient decision-making in multidisciplinary care for amyotrophic lateral sclerosis: the views of health professionals. *Patient Prefer Adher* 2012;6:691-701.
7. Umar N, Schollgen I, Terris DD. It is not always about gains: utilities and disutilities associated with treatment features in patients with moderate-to-severe psoriasis. *Patient Prefer Adher* 2012;6:187-184.
8. Levinson W, Roter D, Mullooly J, Frankel R. Physician-patient communication: The relationship with malpractice claims among primary care physicians and surgeons. *J Am Med Assoc* 1997;277:553-559.
9. Shaw WS, Woiszwilllo MJ, Krupat E. Further validation of the Patient-Practitioner Orientation Scale (PPOS) from recorded visits for back pain. *Patient Educ Couns* 2012;89:288-291.

10. Sweetow RW, Davis A, Hickson L. Paradigm shift in audiology education. *Audiology Today* 2010;Sept/Oct:32-35.
11. Hickson L. Defining a parading shift. *Sem Hear* 2012;33:3-8.
12. Grenness C, Hickson L, Laplante-Lévesque A, Davidson B. Patient-centred audiological rehabilitation: Perspectives of older adults who own hearing aids. *Int J Audiol* 2014;53:S68-75.
13. Laplante-Lévesque A, Hickson L, Grenness C. An Australian survey of audiologists' preferences for patient-centredness. *Int J Audiol* 2014;53:S76-82.
14. Laplante-Lévesque A, Hickson L, Worrall L. A qualitative study of shared decision making in rehabilitative audiology. *J Acad Rehabil Audiol* 2011;43:27-43
15. Poost-Foroosh L, Jennings MB, Shaw L, Meston CN, Cheeseman MF. Factors in client-clinician interaction that influence hearing aid adoption. *Trends Amplif.* 2011; 15(3):127-39
16. Goulios H, Patuzzi RB. Audiology education and practice from an international perspective. *Int J Audiol* 2008;47:647-664.
17. Zhao F, Manchaiah V, St. Claire L, Danermark B, Jones L, Rajalakshmi K, Goodwin R. Exploring the influence of culture on hearing help-seeking and hearing aid uptake: a discussion paper. *Int J Audiol* Submitted.
18. Saha S, Beach MC, Cooper LA. Patient centredness, cultural competency and healthcare quality. *J Natl Med Assoc* 2008;100(11):1275-1285.
19. Krupat E, Putnam SM, Yeager CM. The fit between doctors and patient: Can it be measures?. *J Gen Intern Med* 1996;11:134.
20. Beaton DE, Bombardier C, Guillemin F, Ferraz MB. Guidelines for the process of cross-cultural adaptation of self-report measures. *Spine* 2000;25(24):3186-3191.

- 1  
2  
3  
4 21. Tsimtsiou Z, Benos A, Garyfallos AA, Hatzimouratidis D. Predictors of physicians'  
5 attitudes toward sharing information with patients and addressing psychosocial needs:  
6 A cross-sectional study in Greece . *Health Commun* 2012;27:257-263.  
7  
8  
9  
10  
11 22. Cooper LA, Roter D, Johnson RL, Ford DE, Steinwachs DM, et al. Patient-centred  
12 communication, ratings of care, and concordance of patient and physician race. *Ann*  
13 *Intern Med* 2003;139:907-915.  
14  
15  
16  
17 23. Al-Bawardy R, Blatt B, Al-Shohaib S, Simmens SJ. Cross-cultural comparison of the  
18 patient-centredness of the hidden curriculum between a Saudi Arabia and 9 US  
19 medical schools. *Med Educ Online* 2009;14:19. doi: [10.3885/meo.2009.T0000144](https://doi.org/10.3885/meo.2009.T0000144)  
20  
21  
22  
23 24. Hofstede Centre. National Cultural Dimensions. Available from: [http://geert-](http://geert-hofstede.com/dimensions.html)  
24 [hofstede.com/dimensions.html](http://geert-hofstede.com/dimensions.html) (accessed on April 24, 2014).  
25  
26  
27  
28 25. Epner DE, Baile WF. Patient-centred care: the key to cultural competence. *Ann Oncol*  
29 2012;23(S3):33-42.  
30  
31  
32 26. Kaplan RM, Gandek B, Greenfield S, Rogers W, Ware J. Patient and visit  
33 characteristics related to physicians participatory style: Results from medical outcome  
34 study. *Med Care* 1995;33:1176-1183.  
35  
36  
37  
38 27. Roter D, Hall J. *Doctors talking with patients, Patients talking with doctors*.  
39 Westport: Auburn House, 2006.  
40  
41  
42  
43 28. DiMatteo MR, Giordani PJ, Lepper HS, Croghan TW. Patient adherence and medical  
44 treatment outcomes: A meta-analysis. *Med Care* 2002;40:794-811.  
45  
46  
47  
48 29. Swenson SL, Buell S, Zettler P, White M, Ruston DC. et al. Patient-centered  
49 communication: Do patients really prefer it? *J Gen Intern Med* 2004;19:1069-1080.  
50  
51  
52  
53 30. Lewin S, Skea ZC, Entwistle VA, Zwarenstein M, Dick J. Interventions for providers  
54 to promote a patient-centred approach in clinical consultations. *Cochrane Database*  
55 *Syst Rev* 2009;1:1-60.  
56  
57  
58  
59  
60

- 1  
2  
3  
4 31. Campinha-Bacote J. The process of cultural competence in the delivery of healthcare  
5 services: A model of care. *J Transcult Nurs* 2002;13(3):181-184.  
6  
7  
8  
9  
10  
11  
12  
13  
14  
15  
16  
17  
18  
19  
20  
21  
22  
23  
24  
25  
26  
27  
28  
29  
30  
31  
32  
33  
34  
35  
36  
37  
38  
39  
40  
41  
42  
43  
44  
45  
46  
47  
48  
49  
50  
51  
52  
53  
54  
55  
56  
57  
58  
59  
60

For peer review only

## Tables

**Table 1: Demographic information**

|                                               | <b>All<br/>participants<br/>(n=191)</b> | <b>Portugal<br/>(n=55)</b> | <b>India<br/>(n=78)</b> | <b>Iran<br/>(n=58)</b> |
|-----------------------------------------------|-----------------------------------------|----------------------------|-------------------------|------------------------|
| <b>Age in years (Mean±SD)</b>                 | 30.9±8.4                                | 31.0±8.4                   | 29.6±8.6                | 32.5±8.0               |
| <b>Gender (%)</b>                             |                                         |                            |                         |                        |
| ▪ Male                                        | 37                                      | 20                         | 55                      | 30                     |
| ▪ Female                                      | 63                                      | 80                         | 45                      | 70                     |
| <b>Work set-up (%)</b>                        |                                         |                            |                         |                        |
| ▪ Clinic public                               | 35                                      | 23                         | 39                      | 41                     |
| ▪ Clinic private                              | 50                                      | 51                         | 61                      | 33                     |
| ▪ Clinic both                                 | 12                                      | 15                         | 0                       | 26                     |
| ▪ Education                                   | 1                                       | 2                          | 0                       | 0                      |
| ▪ Not known                                   | 2                                       | 9                          | 0                       | 0                      |
| <b>Education (%)</b>                          |                                         |                            |                         |                        |
| ▪ Bachelors                                   | 47                                      | 72                         | 18                      | 60                     |
| ▪ Masters                                     | 48                                      | 22                         | 74                      | 40                     |
| ▪ Doctorate                                   | 5                                       | 6                          | 8                       | 0                      |
| <b>Work experience in years<br/>(Mean±SD)</b> | 7.2±8.1                                 | 7.8±8.2                    | 6.1±8.8                 | 8.1±6.5                |

**Table 2: Modified patient practitioner orientation scale (PPOS): Mean scores and standard deviation**

|                                                                                                                          | All participants<br>(n=191) | Portugal<br>(n=55) | India<br>(n=78) | Iran<br>(n=58) |
|--------------------------------------------------------------------------------------------------------------------------|-----------------------------|--------------------|-----------------|----------------|
| <b>PPOS Items (Mean±SD)</b>                                                                                              |                             |                    |                 |                |
| 1. The audiologist is the one who should decide what gets talked about during an appointment.                            | 2.4±1.1                     | 2.4±1.2            | 2.3±1.2         | 2.5±1.2        |
| 2. Although health care is less personal these days, this is a small price to pay for audiological advances.             | 3.0±1.4                     | 4.3±1.2            | 2.7±1.2         | 2.1±1.0        |
| 3. The most important part of the standard audiological appointment is the hearing test.                                 | 2.7±1.4                     | 3.4±1.2            | 2.5±1.5         | 2.3±1.1        |
| 4. It is often best for clients if they do not have the full explanation of their audiological condition.                | 4.6±1.3                     | 5.0±1.0            | 4.5±1.5         | 4.2±1.3        |
| 5. Clients should rely on their audiologists' knowledge and not try to find out about their conditions on their own.     | 3.2±1.7                     | 4.2±1.4            | 3.4±1.6         | 2.0±1.3        |
| 6. When audiologists ask a lot of questions about a client's background, they are prying too much into personal matters. | 4.4±1.3                     | 5.0±1.0            | 4.0±1.3         | 4.2±1.4        |
| 7. If audiologists are truly good at diagnosis and treatment, the way they relate to clients is not that important.      | 4.8±1.2                     | 5.5±0.7            | 4.4±1.3         | 4.6±1.2        |
| 8. Many clients continue asking questions even though they are not learning anything new.                                | 3.2±1.2                     | 3.4±1.2            | 3.2±1.2         | 3.0±1.2        |
| 9. Clients should be treated as if they were partners with the audiologist, equal in power and status.*                  | 4.1±1.6                     | 4.7±1.6            | 3.7±1.5         | 4.0±1.5        |
| 10. Clients generally want reassurance rather than information about their audiological condition.                       | 2.8±1.1                     | 3.3±1.0            | 2.7±1.1         | 2.5±1.1        |
| 11. If an audiologist's primary tools are being open and warm, the audiologist will not have a lot of success.           | 4.3±1.4                     | 4.6±1.1            | 3.8±1.4         | 4.6±1.3        |



|                                                                                                                                     |         |         |         |         |
|-------------------------------------------------------------------------------------------------------------------------------------|---------|---------|---------|---------|
| 12. When clients disagree with their audiologist, this is a sign that the audiologist does not have the client's respect and trust. | 3.8±1.2 | 4.6±1.0 | 3.7±1.1 | 3.1±1.2 |
| 13. A management plan cannot succeed if it is in conflict with a client's lifestyle or values.*                                     | 4.7±1.1 | 4.7±1.1 | 4.6±1.0 | 4.7±1.2 |
| 14. Most clients want to get in and out of the audiologist's office as quickly as possible.                                         | 3.5±1.4 | 4.4±1.2 | 3.3±1.2 | 2.9±1.3 |
| 15. The client must always be aware that the audiologist is in charge.                                                              | 2.6±1.3 | 2.7±1.2 | 2.4±1.1 | 2.9±1.5 |
| 16. It is not that important to know a client's culture and background in order to treat the client's audiological condition.       | 4.6±1.3 | 5.3±0.9 | 4.3±1.4 | 4.6±1.2 |
| 17. Humour is a major ingredient in the audiologist's management of the client.*                                                    | 4.1±1.3 | 4.8±1.0 | 3.8±1.3 | 3.8±1.4 |
| 18. When clients look up audiological information on their own, this usually confuses more than it helps.                           | 2.9±1.3 | 2.6±1.0 | 2.8±1.4 | 3.4±1.3 |
| <b>PPOS Scales (Mean±SD)</b>                                                                                                        |         |         |         |         |
| ▪ Full scale                                                                                                                        | 3.6±0.6 | 4.2±0.5 | 3.5±0.6 | 3.4±0.4 |
| ▪ Sharing subscale                                                                                                                  | 3.6±0.7 | 4.2±0.6 | 3.4±0.7 | 3.2±0.5 |
| ▪ Caring subscale                                                                                                                   | 3.7±0.6 | 4.1±0.5 | 3.5±0.5 | 3.6±0.5 |

**Note:** Score of 1 (strongly agree) = most clinician-centred; Score of 6 (strongly disagree) = most patient-centred. Items 9, 13 and 17 (\*) are reversely worded items which were reverse scored.

**Table 3: Differences in audiologists' preferences for patient-centredness between countries**

|                   | Degree of freedom | F-test | P       |
|-------------------|-------------------|--------|---------|
| <b>Sharing</b>    | 2                 | 39.76  | < 0.001 |
| <b>Caring</b>     | 2                 | 24.61  | < 0.001 |
| <b>Full scale</b> | 2                 | 42.49  | < 0.001 |

**FIGURE LEGENDS:**

FIGURE 1: Bar Graphs showing the mean total PPOS Score ('Full Scale'), and the mean PPOS Score for the 'Sharing' and 'Caring' Subscales for Audiologists from Portugal, India and Iran. (\*) indicates a significant difference ( $P < 0.01$ )

FIGURE 2: Bar graph showing Hofstede's cultural dimension values for Portugal, India and Iran. A high score power distance expresses that the less powerful members of a society accept and expect that power is distributed unequally. A high score on Individualism vs Collectivism can be defined as a preference for a loosely-knit social framework in which individuals are expected to take care of only themselves and their immediate families. A high score on 'Masculinity vs Femininity' suggests a preference in society for achievement, heroism, assertiveness and material rewards for success as opposed to cooperation, modesty, caring for the weak and quality of life. A high score on 'Uncertainty Avoidance' suggests members of a society feel uncomfortable with uncertainty and ambiguity. A high score on 'Pragmatism' suggests the society encourages thrift and efforts in modern education as a way to prepare for the future, as opposed to relying on time-honoured traditions. A high score on 'Indulgence' suggests the society follows gratification of basic and natural human drives related to enjoying life and having fun, as opposed to restrain in such activities based on social norms.

1  
2  
3  
4 **Audiologists' preferences for patient-centredness: A cross-**  
5 **sectional questionnaire study of cross-cultural differences and**  
6  
7 **similarities among professionals in Portugal, India and Iran**  
8  
9

10  
11  
12  
13  
14  
15 **Vinaya Manchaiah<sup>1,2</sup>, Philip A. Gomersall<sup>1</sup>, David Tomé<sup>3</sup>, Tayebeh Ahmadi<sup>4</sup> &**  
16 **Rajalakshmi Krishna<sup>5</sup>**  
17

- 18  
19  
20 1. Department of Vision and Hearing Sciences, Anglia Ruskin University, Cambridge,  
21 United Kingdom  
22  
23 2. Linnaeus Centre HEAD, Department of Behavioral Sciences and Learning, The  
24 Swedish Institute for Disability Research, Linköping University, Linköping, Sweden  
25  
26 3. Department of Audiology, School of Allied Health Sciences, Polytechnic Institute of  
27 Porto, Vila Nova de Gaia, Portugal  
28  
29 4. Department of Audiology, University of Social Welfare and Rehabilitation Sciences,  
30 Tehran, Iran  
31  
32 5. All India Institute of Speech and Hearing, University of Mysore, Mysore, India  
33  
34  
35  
36  
37  
38  
39  
40  
41

42 **Corresponding Author:** Philip A. Gomersall

43  
44 **Address:** Department of Vision and Hearing Sciences, Coslett 204, Anglia Ruskin  
45 University, Cambridge CB1 1PT, United Kingdom  
46

47  
48 **Email:** [phil.gomersall@anglia.ac.uk](mailto:phil.gomersall@anglia.ac.uk); **Tel:** +44 (0)1223 698653  
49  
50  
51  
52  
53  
54  
55  
56  
57  
58  
59  
60

## Abstract

**Objective:** Patient-centredness has become one of the important aspects of health service delivery, however, a limited number of studies exist that focus on this concept in the domain of hearing healthcare. The objective of this study was to examine and compare audiologists' preferences for patient-centredness in Portugal, India and Iran. **Design:** The study used a cross-sectional survey design with audiologists recruited from three different countries.

**Participants:** A total of 191 fully-completed responses were included in the analysis (55 from Portugal, 78 from India and 58 from Iran). **Main outcome measure:** The Patient-Practitioner

Orientation Scale. **Results:** Patient-Practitioner Orientation Scale mean scores suggest that

Audiologists have a preference for patient-centredness (i.e., mean of 3.6 in 5 point scale).

However, marked differences were observed between specific PPOS items suggesting these

preferences vary across clinical situations. A significant level of difference ( $p < 0.001$ ) was

found between audiologists' preferences for patient-centredness in three countries.

Audiologists in Portugal had a greater preference for patient-centredness when compared to

audiologists in India and Iran, although no significant differences were found in terms of age

and duration of experience among these sample populations. **Conclusion:** There are

differences and similarities in audiologists' preferences for patient-centredness among

countries. These findings may have implications for the training of professionals and also for

clinical practice in terms of optimising hearing healthcare across countries.

## Key Words

Patient-centeredness, Audiology, hearing healthcare, cross-culture

## Summary

### Article Focus

- To examine and compare audiologists' preferences for patient-centredness in Portugal, India and Iran.

### Key Message

- A significant level of difference was found between audiologists' preferences for patient-centredness in three countries.
- Audiologists in Portugal had a greater preference for patient-centredness when compared to audiologists in India and Iran.
- These findings may have implications for the training of professionals and for clinical practice in terms of optimising hearing healthcare across countries.

### Strengths and Weakness

- A response rate of 76% was obtained for this questionnaire-based study and there was diversity in the data from audiologists distributed across three countries.
- Some variables such as healthcare delivery models and educational system were not controlled for, but may have contributed to the differences and similarities noticed in audiologists preferences.
- A sampling bias may have been present, since audiologists with particular preferences may have been more inclined to respond to the questionnaire.
- The fact that identifiable information may have been present in the emailed responses had the potential to influence/discourage an individual's response.

## Introduction

There has been an increase in advocacy towards patients' involvement in their health and care delivery, hence the concept 'patient-centredness' has received much attention over the past few decades.<sup>1</sup> Patient-centredness involves aspects such as increased importance placed on patient participation, self-determination of patients in their healthcare, and the creation of a power-balanced therapeutic relationship between patients and professionals.<sup>2</sup> Although there has been little consensus over the meaning of this concept universally, patient-centredness has been described with five main dimensions: (1) biopsychosocial perspective; (2) patient as a person; (3) shared power and responsibility; (4) therapeutic alliance; and (5) clinician as a person.<sup>1</sup> Patient-centredness has been suggested to be fundamental part of the successful management of chronic health conditions.<sup>3</sup>

Studies from a variety of areas of healthcare have suggested that the health professional's preferences towards patient-centredness is important in determining outcomes and patient satisfaction.<sup>4-7</sup> Issues surrounding patient-centred care have also been linked to malpractice claims,<sup>8</sup> and in general a preference for patient-centeredness correlates well with good clinical practices.<sup>9</sup>

The profession of Audiology is particularly interesting in this context since, traditionally, there has been a focus on the technological aspects of hearing healthcare. Some researchers believe that the last two decades has seen a paradigm shift; moving from a focus on the technological aspects of hearing healthcare to a more person-centred approach to rehabilitation.<sup>10 11</sup> The empirical evidence for this shift is limited, with only a small number of published studies on patient-centredness specific to audiology.<sup>12 13</sup> Laplante-Lévesque et al

1  
2  
3  
4 conducted a qualitative study, exploring shared decision making in adults with acquired  
5  
6 hearing impairment, which suggested that patients wanted rehabilitative audiologists to hear  
7  
8 their experiences and preferences and to tailor their interventions accordingly.<sup>14</sup> Poost-  
9  
10 Foroosh et al.<sup>15</sup> studied the factors in the interaction between Audiologists and clients in the  
11  
12 decision to purchase a hearing aid. The study asked twelve clients with acquired hearing loss  
13  
14 and ten audiologists, from both University and private practices, to supply statements  
15  
16 regarding which clinician-patient factors they felt influenced the decision to purchase a  
17  
18 hearing aid. Client-centred interaction was identified as one of two major themes in the  
19  
20 responses provided (client-empowerment was the other).  
21  
22  
23

24  
25  
26 Grenness et al.<sup>12</sup> studied the views of older adults who own hearing aids in order to further  
27  
28 define patient-centred care in the context of audiological rehabilitation. Interviews were  
29  
30 conducted with ten older adults with hearing aids, exploring their views and the data were  
31  
32 analysed using qualitative content analysis. The results suggested three dimensions: (1) the  
33  
34 therapeutic relationship; (2) the players - patient and audiologist; and (3) the clinical process,  
35  
36 and an overarching theme of individualised care specific to audiological rehabilitation. In  
37  
38 each case, the research discussed above demonstrates the significant value that patients place  
39  
40 in the relationship with the clinician. The reader is referred to a recent literature review by  
41  
42 Grenness et al.<sup>2</sup> for further details on patient-centred care in relation to rehabilitative  
43  
44 Audiology.  
45  
46  
47  
48  
49

50  
51 A recent study focussing specifically on Audiologists in Australia found a high preference  
52  
53 for patient-centredness.<sup>13</sup> Moreover, demographic factors such as age, duration of work  
54  
55 experience and employment type (i.e., public/ private) acted as influencing factors towards  
56  
57 explaining patient-centredness. For example, older audiologists and those who had practiced  
58  
59  
60



1  
2  
3  
4 longer had a significantly greater preference to patient-centredness when compared to  
5  
6 younger and less-experienced audiologists. This is the only published study that has explicitly  
7  
8 explored audiologists' preferences towards patient-centredness. As a consequence, it is  
9  
10 unknown if audiologists in other countries would display similar preferences. Given that  
11  
12 Audiology practices vary considerably across countries,<sup>16</sup> it would be useful to examine  
13  
14 audiologists' preferences for patient-centeredness across different countries which vary in  
15  
16 terms of culture and healthcare systems. Moreover, it has been highlighted in general that  
17  
18 there are few cross-cultural studies in the area of hearing healthcare, highlighting the need for  
19  
20 such studies<sup>18</sup>  
21  
22  
23  
24  
25

26 Cultural competence is a key aspect that is known to influence healthcare quality<sup>17 18</sup>. We  
27  
28 hypothesise that cultural aspects can influence both patients' and providers' preferences in  
29  
30 healthcare and towards patient-centredness. We were particularly interested in understanding  
31  
32 and comparing the preferences for patient-centeredness among Audiologists in European and  
33  
34 Asian countries. Asian countries, compared to European countries, are considered to be more  
35  
36 collectivist societies, with a greater emphasis placed on the role of the individual as part of a  
37  
38 local group and/or community with less of a tendency to focus on 'looking after oneself'.  
39  
40 Further to this, it has been posited that Asian countries have a tendency towards a high  
41  
42 'power distance' within levels of organisations – this reflects how willing the less powerful  
43  
44 members of an organisation or group are to accept an unequal distribution of power. In the  
45  
46 context of patient-centredness such cultural effects might result in different opinions towards  
47  
48 a hierarchical 'paternalistic' approach to audiological management, versus a patient centred-  
49  
50 approach.  
51  
52  
53  
54  
55  
56  
57  
58  
59  
60

1  
2  
3  
4 The aim of the current study was to examine and compare audiologists' preferences for  
5  
6 patient-centredness in Portugal, India and Iran. These countries vary in terms of healthcare  
7  
8 system, culture and socio-economic status. However, they were chosen as they all have a  
9  
10 minimum educational level requirement of a Bachelor's degree education for Audiologists,  
11  
12 and also due to convenience in data collection.  
13

## 14 15 16 17 **Method**

### 18 19 *Ethical Considerations*

20  
21 Ethical approval was obtained from the *School of Allied Health Sciences, Polytechnic*  
22  
23 *Institute of Porto* at Porto and *All India Institute of Speech and Hearing* at Mysore for data  
24  
25 collection in Portugal and India respectively. This kind of study did not require ethical  
26  
27 approval under the *Department of Audiology, University of Social Welfare and Rehabilitation*  
28  
29 *Sciences* at Tehran for data collection in Iran.  
30  
31  
32

### 33 34 35 *Study Design and Participants*

36  
37 The current study used a cross-sectional survey design and purposive sampling to recruit  
38  
39 participants. The email mailing list was obtained from university and professional  
40  
41 associations which consisted of audiologists distributed throughout each of the three  
42  
43 countries. The Patient-Practitioner Orientation Scale (PPOS) questionnaire, with some  
44  
45 additional demographics questions (i.e., age, gender, number of years of experience, work  
46  
47 set-up, country of origin and country **in which** currently practicing), was sent to 260  
48  
49 Audiologists (80 in Portugal, 110 in India and 70 in Iran) via email, requesting them to  
50  
51 complete and return back to the researcher by email. Two email reminders were sent for non-  
52  
53 respondents after two and four weeks respectively. As the Email ID might have contained  
54  
55 some information that may have helped identify the individual, the survey was not fully  
56  
57  
58  
59  
60

1  
2  
3  
4 anonymous. In the interest of keeping the survey short, only limited demographic information  
5  
6 was requested and the choice was made to consider the most important aspects based on  
7  
8 previous studies.  
9

### 10 11 12 *Questionnaire*

13  
14 The PPOS was developed by Krupat et al.<sup>19</sup> to study physician preferences towards patient-  
15  
16 centredness. However, a modified version of the PPOS that has previously been used to study  
17  
18 audiologists' preferences towards patient-centredness was used in the current study.<sup>13</sup> This  
19  
20 modified version of the PPOS was found to have acceptable internal consistency ( $\alpha=0.78$ ).  
21  
22 This scale has eighteen questions which are scored on a 6-point Likert scale (1 = strongly  
23  
24 agree; 6 = strongly disagree). The total score ranges from 18 (most patient-centred) to 108  
25  
26 (most audiologist-centred), and there are two sub-scales: The first nine-item sub-scale,  
27  
28 *sharing*, reflects the extent to which the respondent believes that patients desire information  
29  
30 and should be part of the decision making process (e.g., patients should be treated as if they  
31  
32 were partners with the audiologists, equal in power and status). The other nine-item sub-  
33  
34 scale, *caring*, reflects the extent to which the respondent sees the patient's expectations,  
35  
36 feelings, and life circumstances as critical elements in the treatment process (e.g., a treatment  
37  
38 plan cannot succeed if it is in conflict with a patient's lifestyle or values).  
39  
40  
41  
42  
43  
44  
45

46 An English version of the questionnaire was administered in India. Portuguese and Farsi  
47  
48 translated versions were used in Portugal and Iran respectively. The questionnaire translation  
49  
50 process was aimed at achieving different language versions of the English instrument that are  
51  
52 conceptually equivalent in each of the target countries/cultures. That is, the focus was on  
53  
54 cross-cultural and conceptual, rather than on linguistic/literal equivalence. We followed the  
55  
56 well accepted forward-translations and back-translations method.<sup>20</sup> This process involved  
57  
58  
59  
60

1  
2  
3  
4 four main stages: forward translation; expert back translation; review and resolution of any  
5  
6 discrepancies; and pre-testing with five participants each, in both Portugal and Iran.  
7  
8  
9

### 10 **Data Analysis**

11  
12 In the first instance, descriptive statistics (i.e., mean, standard deviation), a test of normality  
13  
14 and a test of homogeneity of variance were performed. Mean total PPOS scores for  
15  
16 audiologists from three countries were compared using an independent one-way analysis of  
17  
18 variance (ANOVA). An alpha level of 0.01 was used to determine significance. Bonferroni  
19  
20 *post-hoc* analysis was performed to further examine the relationship between groups. Further,  
21  
22 a one-way analysis of covariance (ANCOVA) was performed with age and duration of work  
23  
24 experience as covariates in order to exclude the influence of these variables on **the observed**  
25  
26 differences **between** the group means.  
27  
28  
29  
30  
31  
32

### 33 **Results**

34  
35 A total of 198 responses (response rate of 76%) were received. This included: 55 responses  
36  
37 from Portugal (response rate of 69%); 82 responses from India (response rate of 75%); and  
38  
39 61 responses from Iran (response rate of 87%). However, three responses from Iran  
40  
41 (incomplete data) and four responses from India (audiologists currently practicing in a  
42  
43 different country) were excluded. A total of 191 responses (i.e., 73%) were included in the  
44  
45 analysis (55 from Portugal, 78 from India and 58 from Iran). Table 1 presents the  
46  
47 demographic information and Table 2 presents PPOS scores. ANOVA showed no difference  
48  
49 between groups in terms of age [ $F(2, 188) = 2.13, p = 0.121$ ] and also duration of work  
50  
51 experience [ $F(2, 188) = 1.16, p = 0.313$ ].  
52  
53  
54

55 [Table 1 near here]

56 [Table 2 near here]

1  
2  
3  
4  
5  
6 Data for both full-scale and subscales were found to be normally distributed (based on  
7  
8 Kolmogorov-Smirnov test and visual examination of histograms). Homogeneity of variances  
9  
10 (based on Levene's test) was found for *caring* and *total mean* ( $p = 0.625$  and  $0.129$   
11  
12 respectively) and not for *sharing* ( $p = 0.020$ ). Since our data were found to be normally  
13  
14 distributed, we elected to use ANOVA for our analysis, despite the fact that homogeneity of  
15  
16 variances could not be assumed for the *sharing* subscale. A robust procedures (Welch and  
17  
18 Brown-Forsythe) test was performed to check ANOVA findings which indicated the same  
19  
20 significant differences between group means ( $p < 0.001$  in all cases).  
21  
22  
23  
24  
25

26 The PPOS mean scores from each population were analysed using a one way between-  
27  
28 subjects ANOVA (see Table 3). A significant result was found for *sharing* subscale [ $F(2,$   
29  
30  $188) = 39.76$ ], *caring* subscale [ $F(2, 188) = 24.61$ ] and the *full* scale [ $F(2, 188) = 42.49$ ].  
31  
32 Further, *post-hoc* tests with Bonferroni correction showed that the difference between  
33  
34 Portugal and India and also Portugal and Iran were significant for *sharing* subscale, *caring*  
35  
36 subscale and *full* scale ( $p = 0.001, 0.001$  and  $0.001$  respectively). However, the difference  
37  
38 between India and Iran were not statistically significant for the *sharing* subscale, *caring*  
39  
40 subscale and *full* scale ( $p = 0.171, p=0.841$  and  $p=1$  respectively).  
41  
42  
43  
44  
45

46 [Table 3 near here]  
47  
48  
49

50 These results show some differences and some similarities in audiologists' preferences  
51  
52 towards patient-centredness from different countries (see Figure 1). Audiologists in Portugal  
53  
54 had significantly greater preference for patient-centredness when compared to audiologists in  
55  
56 India and Iran whose preferences did not differ much.  
57  
58  
59  
60

[Figure 1 near here]

Whilst our sample populations were well matched, with no significant differences with respect to age and experience, this does not exclude some possible influence of these variables on the data. Therefore we elected to include these variables as covariates, and assess if this had an influence on the main effect observed: The data met the necessary assumptions (i.e., linearity, homoscedasticity and homogeneity of regression slopes) and the ANCOVA results with age and duration of work experience as covariates and PPOS scores as dependent variable gave results consistent with the ANOVA, with a significant main effect for the full scale and subscales only and no significant interaction was observed. Thus we conclude that differences exist between the responses from audiologists from these countries in preference for patient-centredness, even after accounting for age and duration of work experience.

## Discussion

This study examined and compared audiologists' preferences for patient-centredness in Portugal, India and Iran. The PPOS scores indicate the self-reported preference for aspects of patient-centredness. An overall mean score greater than 3 for all three countries included suggests that there is a tendency for Audiologists to favour patient-centredness, rather than a clinician-centred approach. This is true for both *caring* and *sharing* subscales. These values can be compared to those observed across other medical specialities.<sup>5</sup> For example, general practitioners and oncology physicians had higher PPOS mean scores (i.e., 4.3 and 5.0 respectively) when compared with physicians with a surgical background (i.e., 2.9). Thus it appears that the training route and specific duties of the professional could be considered as factors in determining patient-centred practice.

1  
2  
3  
4  
5  
6 From examination of the responses to each item it can be seen that audiologists' preferences  
7  
8 for patient-centredness vary depending upon the situation described (see Table 2). There is  
9  
10 some grouping of item responses, for example, mean PPOS score 2.4 in *item 1* (i.e.,  
11  
12 audiologist is the one who should decide what gets talked about during an appointment), 2.7  
13  
14 in *item 2* (i.e., most important part of the standard audiological appointment is the hearing  
15  
16 test), 2.8 in *item 10* (i.e., clients generally want reassurance rather than information about  
17  
18 their audiological condition) and 2.6 in *item 15* (i.e., client must always be aware that the  
19  
20 audiologist is in charge). These were markedly lower than the mean PPOS scores of 4.6 in  
21  
22 *item 4* (i.e., it is often best for clients if they do not have the full explanation of their  
23  
24 audiological condition), 4.8 in *item 7* (i.e., if audiologists are truly good at diagnosis and  
25  
26 treatment, the way they relate to clients is not that important) and 4.7 in *item 13* (i.e., a  
27  
28 management plan cannot succeed if it is in conflict with a client's lifestyle or values). Similar  
29  
30 results have been reported in a recent Australian study.<sup>14</sup> These observations suggest that the  
31  
32 preference for patient centredness is consistent across particular situations. Generally,  
33  
34 audiologists prefer more control during the clinical appointment and like to decide what  
35  
36 information has the priority of discussion and also prefer to have audiological tests as the  
37  
38 central focus of the clinical appointment. This maybe because of the fact that traditionally  
39  
40 audiological practice had a greater emphasis on technology and many audiologists followed  
41  
42 more of a prescriptive approach to management. However, some researchers suggest that  
43  
44 there is a growing trend towards audiological practice with more emphasis on client-centred  
45  
46 rehabilitation.<sup>10, 11</sup> Therefore; it may be useful to monitor Audiologists preferences for  
47  
48 patient-centredness over time.  
49  
50  
51  
52  
53

54  
55 The study results suggest some country-specific differences and some similarities in  
56  
57 preferences for patient-centredness among audiologists from Portugal ( $M = 4.2$ ;  $SD = 0.5$ ),  
58  
59  
60

1  
2  
3  
4 India ( $M = 3.5$ ;  $SD = 0.6$ ) and Iran ( $M = 3.4$ ;  $SD = 0.4$ ). Generally, audiologists' in Portugal  
5  
6 had a high preference for patient-centredness, when compared to audiologists in India and  
7  
8 Iran. Moreover, a recent study found that Australian audiologists<sup>14</sup> have high preference for  
9  
10 patient-centredness ( $M = 4.46$ ;  $SD = 0.52$ ), which is similar to Portugal audiologists'  
11  
12 preferences reported in the current study.  
13

14  
15  
16  
17  
18 When comparing scores across countries the trend for higher PPOS scores provided by  
19  
20 audiologists from Portugal compared to their peers from India and Iran, was true for almost  
21  
22 all questionnaire items when analysed individually. However, some variations exist. For  
23  
24 example, scores for *item 1* (i.e., audiologist is the one who should decide what gets talked  
25  
26 about during an appointment), was similar among audiologists in all three countries. This  
27  
28 might reflect a similarity in service delivery that place restricted time allowances on clinical  
29  
30 session that would encourage the Audiologist to keep conversation 'on task'. Scores for *item*  
31  
32 *18* (i.e., when clients look up audiological information on their own, this usually confuses  
33  
34 more than it helps) followed the reverse trend with audiologists in India and Iran scoring  
35  
36 higher than audiologists in Portugal, albeit by relatively small differences in score. In this  
37  
38 case, the ability of the patient population to find relevant information may be related to local  
39  
40 factors such as internet access and language-specific information resources. *Item 2* had the  
41  
42 largest difference in score between Portugal and the other two countries (i.e., Although health  
43  
44 care is less personal these days, this is a small price to pay for audiological advances). The  
45  
46 responses could have been influenced by how the respondent views recent audiological  
47  
48 advances. Improvements in technology have occurred at different times in different countries,  
49  
50 and therefore it may be that audiologist's responses are reflecting their opinion on which  
51  
52 technological advancements they feel have helped clients, as much reflecting their opinion on  
53  
54  
55  
56  
57  
58  
59  
60



1  
2  
3  
4 the changing personal aspect of healthcare. An example would be if the move from analogue  
5  
6 to digital technology was more recent for India and Iran; this may be valued more highly  
7  
8 against a loss of the personal involvement in healthcare than in Portugal, if this development  
9  
10 had occurred further in the past. .  
11  
12

13  
14  
15 Studies from other disciplines have shown that the PPOS scores indicating preference for  
16  
17 patient-centredness can vary among professionals in different countries. For example,  
18  
19 medical practitioners' mean PPOS scores of 4.8 in the USA,<sup>4</sup> compared to 3.3 in Greece.<sup>21</sup>,  
20  
21

22  
23  
24 The key influencing factors for the differences observed are the local healthcare system,  
25  
26 national culture, organisational-related factors (see Grenness et al.<sup>2</sup>), ethnicity<sup>22</sup> and cross-  
27  
28 cultural aspects<sup>23</sup> as indicated in studies from other areas. We hypothesise that one of the  
29  
30 main contributing factors could be the 'culture'. Geert Hofstede defines culture as '*the*  
31  
32 *collective programming of the mind distinguishing the members of one group or category of*  
33  
34 *people from another*'.<sup>24</sup> Figure 2 represents Hofstede's dimensions of national culture in  
35  
36 Portugal, India and Iran, which include: power distance; individualism; masculinity;  
37  
38 uncertainty avoidance; pragmatism; and indulgence.<sup>24</sup> A greater number of similarities are  
39  
40 noticed between India and Iran when compared to Portugal (e.g., individualism, masculinity  
41  
42 and uncertainty avoidance). These observations are consistent with a contribution of culture  
43  
44 to differences and similarities in preferences for patient-centredness noticed among different  
45  
46 countries in this study. It would also be consistent with the previously reported findings of  
47  
48 medical practitioners from the USA, a country with a very high score of Individualism,  
49  
50 compared to Greece, considered to be a collectivist culture. Given this finding, we argue that  
51  
52 there is a need for increased focus on cultural competency for professionals in order to  
53  
54 deliver patient-centred care.<sup>25</sup>  
55  
56  
57  
58  
59  
60

[Figure 2 near here]

It is important to note that the current study focused on self-reported preferences for patient-centredness and not the actual clinical behaviour. Previous studies have suggested that the preferences for patient-centredness measured using PPOS correlate well with the actual clinical behaviour of professionals as measured by verbal exchange between patients and professionals.<sup>9</sup> However, not much is known about the patients' preferences for hearing healthcare services and more importantly for 'patient-centred healthcare' within these countries. Further studies with a qualitative design may help explore these aspects. A further consideration is to what extent the clinician population will reflect the general 'culture' that is assigned to a nation- it is likely that they vary from the general population with regards educational level in addition to other socioeconomic factors, and the degree of difference is likely to be specific to the particular profession, and also country being considered. However, we also consider it unlikely that there is no influence of country-specific cultural factors on the clinician population at all.

Other potential influences on audiologists' preferences for patient centredness are age, duration of work experience and employment type.<sup>13</sup> In the current study no significant differences existed between groups in terms of age and duration of work experience. The distribution of audiologists among different areas of employment was broadly similar between countries. However, differences were noted in terms of participants' gender between countries. The estimates of male/female ratio practicing in Audiology in these countries, as indicated by the professional bodies, are 1:4, 1:2 and 1:2 in Portugal, India and Iran respectively. The current study sample had a similar gender pattern of audiologists even though not exactly matching these ratios. Gender has been found to influence the

1  
2  
3  
4 practitioners' preference for patient-centredness with women displaying a greater preference  
5  
6 for patient-centredness than male counterparts,<sup>26 27</sup> although this was not found to be a  
7  
8 significant factor for audiologists' preferences for patient-centredness in a large scale  
9  
10 Australian study.<sup>13</sup> Hence, further exploration of a gender effect in preference for patient-  
11  
12 centredness is necessary in future studies.  
13

### 14 15 16 17 *Study Implications and Future Directions*

18  
19 Patient-centredness is important in healthcare as it is linked to patient-outcomes such as  
20  
21 increased satisfaction, adherence and health outcomes<sup>28 29</sup> and also to perceived quality of  
22  
23 service delivery.<sup>18</sup> Considering that there is evidence that rehabilitative Audiology patients  
24  
25 also prefer patient-centred care,<sup>14</sup> this concept has direct clinical implications in hearing  
26  
27 healthcare.  
28  
29

30  
31  
32  
33 The current study reports some interesting findings about audiologists' preference to patient-  
34  
35 centredness in different countries. Extrapolating from the above discussion, we may suggest  
36  
37 that the patients in Portugal may have better outcomes when compared to patients in India  
38  
39 and Iran as the Portugal audiologists had high preference for patient-centredness when  
40  
41 compared to audiologists in India and Iran. However, it might be more appropriate to study  
42  
43 patient-centredness of professionals in congruence with patients.<sup>4</sup> For example, although the  
44  
45 mean scores in India and Iran were lower than those of Portugal, if the patients in India and  
46  
47 Iran have similar preferences for patient-centredness as the professionals then, the care  
48  
49 delivery is likely to meet patients' expectations. Further, it would be useful and important to  
50  
51 understand how the concept of patient-centredness is understood and valued by both  
52  
53 professionals and patients in different countries. If future studies (focussing on both  
54  
55  
56  
57  
58  
59  
60

professionals and patients) suggest marked differences, similar to those demonstrated here, it may be necessary to reconceptualise the principle of patient-centredness.

Given that patient-centredness has been found to be an important factor in patient satisfaction and outcomes, at least in some countries, and since it has been suggested that clinicians can learn to become patient-centred,<sup>30</sup> it may be necessary to include such concepts in training programmes, particularly in cases where practitioners demonstrate a significantly lower preference towards patient-centredness than their patients. Moreover, future studies may also focus on understanding the differences and similarities in preferences towards patient-centredness among sub-cultures within the same country (e.g., different ethnic groups). Such studies may shed some light into arguments of researchers who have been advocating the need for cultural competence in the delivery of healthcare services.<sup>31</sup> Moreover; this may have consequences for the increasingly international Audiology workforce,<sup>16</sup> both in terms of the migration of audiologists to other countries for better job prospects and the provision of distance-learning models of education. Overall, this information may highlight the need for optimising hearing healthcare globally.

### ***Strengths and Limitations***

A response rate of 76% was obtained for this questionnaire-based study and there was diversity in the data from audiologists' distributed across three countries. Nevertheless, the study has some limitations. For example, aspects such as healthcare delivery models and educational system were not controlled for, but may have contributed to the differences and similarities noticed in audiologists preferences. However, there was a reasonable spread of audiologist practicing in public and private Audiology clinics, and audiologists in all three countries were trained to a minimum standard of a Bachelor's degree. A relatively small

1  
2  
3  
4 sample size and lack of anonymity in data collection were also limitations of the current  
5  
6 study. We were aware that a sampling bias may have been present, since audiologists with  
7  
8 particular preferences may have been more inclined to respond to the questionnaire. The fact  
9  
10 that identifiable information may have been present in the emailed responses had the  
11  
12 potential to influence/discourage an individual's response. These biases would have been  
13  
14 present for all countries.  
15  
16  
17  
18  
19

## 20 Conclusion

21  
22 The data described here are the first in hearing healthcare to demonstrate specific differences  
23  
24 and similarities in audiologists' preferences for patient-centeredness across three countries.  
25

26 We observed that the two countries with the most similar cultural profile had the most similar  
27  
28 preference level for patient-centred care. There are several factors might influence preference  
29  
30 for patient centred-practice, and further investigation is required in order to determine the role  
31  
32 of the education and healthcare system, organisational-related factors, and ethnicity in  
33  
34 contributing to the differences and similarities noticed. Clinician reported Patient-  
35  
36 centredness and the cultural aspects of the clinician and patient population are different  
37  
38 across countries and this may have implications for the training professionals and  
39  
40 implementation of clinical practice in terms of optimising hearing healthcare across countries.  
41  
42  
43  
44  
45  
46

## 47 Acknowledgements

48  
49 We gratefully acknowledge Professors Edward Krupat and Louise Hickson for allowing us to  
50  
51 use the modified version of the PPOS.  
52  
53  
54  
55

## 56 Contributors

1  
2  
3  
4 VM - Contributed to most parts of the work including data collection, analysis and writing;

5  
6 PG - Contributed to data analysis, interpretation and write up; DT - Contributed to data  
7  
8 collection and write up; TA - Contributed to data collection and write up; KR - Contributed to  
9  
10 data collection and write up.  
11

## 12 13 14 15 **Funding**

16  
17 No funding was received to conduct this study.  
18  
19

## 20 21 22 **Ethical Approval**

23  
24 Ethical approval was obtained from the *School of Allied Health Sciences, Polytechnic*  
25  
26 *Institute of Porto* at Porto and *All India Institute of Speech and Hearing* at Mysore for data  
27  
28 collection in Portugal and India respectively. This kind of study did not require ethical  
29  
30 approval under the *Department of Audiology, University of Social Welfare and Rehabilitation*  
31  
32 *Sciences* at Tehran for data collection in Iran.  
33  
34  
35  
36  
37

## 38 39 **Data Sharing**

40  
41 No additional data are available.  
42  
43  
44

## 45 46 **Conflict of interests**

47  
48 None.  
49  
50

## 51 52 **References**

- 53  
54  
55 1. Mead N, Bower P. Patient-centredness: a conceptual framework and review of the  
56  
57 empirical literature. *Soc Sci Med* 2000;51:1087-1110.  
58  
59  
60

2. Grenness C, Hickson L, Laplante-Lévesque A, Davidson B. Patient-centredness care: A review for rehabilitative audiologists. *Int J Audiol* 2014;53:S60-67.
3. Michie S, Miles J, Weinman J. Patient-centredness in illness: What is it and does it matter?. *Patient Educ Couns* 2003;51:197-206.
4. Krupat E, Rosenkranz SL, Yeager CM, Barnard K, Putnam SM, Inui TS. The practice orientations of physicians and patients: the effect of doctor-patient congruence on satisfaction. *Patient Educ Couns* 2000;39:49-59.
5. Chan CMH, Azman WA. Attitudes and role orientation of doctor-patient fit and patient satisfaction in cancer care. *Singapore Med J* 2012;53(1):52-56.
6. Hogden A, Greenfield D, Nugus P, Kiernan MC. Engaging in patient decision-making in multidisciplinary care for amyotrophic lateral sclerosis: the views of health professionals. *Patient Prefer Adher* 2012;6:691-701.
7. Umar N, Schollgen I, Terris DD. It is not always about gains: utilities and disutilities associated with treatment features in patients with moderate-to-severe psoriasis. *Patient Prefer Adher* 2012;6:187-184.
8. Levinson W, Roter D, Mullooly J, Frankel R. Physician-patient communication: The relationship with malpractice claims among primary care physicians and surgeons. *J Am Med Assoc* 1997;277:553-559.
9. Shaw WS, Woiszwillo MJ, Krupat E. Further validation of the Patient-Practitioner Orientation Scale (PPOS) from recorded visits for back pain. *Patient Educ Couns* 2012;89:288-291.
10. Sweetow RW, Davis A, Hickson L. Paradigm shift in audiology education. *Audiology Today* 2010;Sept/Oct:32-35.
11. Hickson L. Defining a paradigm shift. *Sem Hear* 2012;33:3-8.

12. Grenness C, Hickson L, Laplante-Lévesque A, Davidson B. Patient-centred audiological rehabilitation: Perspectives of older adults who own hearing aids. *Int J Audiol* 2014;53:S68-75.
13. Laplante-Lévesque A, Hickson L, Grenness C. An Australian survey of audiologists' preferences for patient-centredness. *Int J Audiol* 2014;53:S76-82.
14. Laplante-Lévesque A, Hickson L, Worrall L. A qualitative study of shared decision making in rehabilitative audiology. *J Acad Rehabil Audiol* 2011;43:27-43
15. Poost-Foroosh L, Jennings MB, Shaw L, Meston CN, Cheeseman MF. Factors in client-clinician interaction that influence hearing aid adoption. *Trends Amplif.* 2011; 15(3):127-39
16. Goulios H, Patuzzi RB. Audiology education and practice from an international perspective. *Int J Audiol* 2008;47:647-664.
17. Zhao F, Manchaiah V, St. Claire L, Danermark B, Jones L, Rajalakshmi K, Goodwin R. Exploring the influence of culture on hearing help-seeking and hearing aid uptake: a discussion paper. *Int J Audiol* Submitted.
18. Saha S, Beach MC, Cooper LA. Patient centredness, cultural competency and healthcare quality. *J Natl Med Assoc* 2008;100(11):1275-1285.
19. Krupat E, Putnam SM, Yeager CM. The fit between doctors and patient: Can it be measures?. *J Gen Intern Med* 1996;11:134.
20. Beaton DE, Bombardier C, Guillemin F, Ferraz MB. Guidelines for the process of cross-cultural adaptation of self-report measures. *Spine* 2000;25(24):3186-3191.
21. Tsimtsiou Z, Benos A, Garyfallos AA, Hatzimouratidis D. Predictors of physicians' attitudes toward sharing information with patients and addressing psychosocial needs: A cross-sectional study in Greece . *Health Commun* 2012;27:257-263.



- 1  
2  
3  
4 22. Cooper LA, Roter D, Johnson RL, Ford DE, Steinwachs DM, et al. Patient-centred  
5 communication, ratings of care, and concordance of patient and physician race. *Ann*  
6 *Intern Med* 2003;139:907-915.  
7  
8  
9  
10 23. Al-Bawardy R, Blatt B, Al-Shohaib S, Simmens SJ. Cross-cultural comparison of the  
11 patient-centredness of the hidden curriculum between a Saudi Arabia and 9 US  
12 medical schools. *Med Educ Online* 2009;14:19. doi: [10.3885/meo.2009.T0000144](https://doi.org/10.3885/meo.2009.T0000144)  
13  
14  
15 24. Hofstede Centre. National Cultural Dimensions. Available from: [http://geert-](http://geert-hofstede.com/dimensions.html)  
16 [hofstede.com/dimensions.html](http://geert-hofstede.com/dimensions.html) (accessed on April 24, 2014).  
17  
18  
19 25. Epner DE, Baile WF. Patient-centred care: the key to cultural competence. *Ann Oncol*  
20 2012;23(S3):33-42.  
21  
22 26. Kaplan RM, Gandek B, Greenfield S, Rogers W, Ware J. Patient and visit  
23 characteristics related to physicians participatory style: Results from medical outcome  
24 study. *Med Care* 1995;33:1176-1183.  
25  
26 27. Roter D, Hall J. *Doctors talking with patients, Patients talking with doctors*.  
27 Westport: Auburn House, 2006.  
28  
29 28. DiMatteo MR, Giordani PJ, Lepper HS, Croghan TW. Patient adherence and medical  
30 treatment outcomes: A meta-analysis. *Med Care* 2002;40:794-811.  
31  
32 29. Swenson SL, Buell S, Zettler P, White M, Ruston DC. et al. Patient-centered  
33 communication: Do patients really prefer it? *J Gen Intern Med* 2004;19:1069-1080.  
34  
35 30. Lewin S, Skea ZC, Entwistle VA, Zwarenstein M, Dick J. Interventions for providers  
36 to promote a patient-centred approach in clinical consultations. *Cochrane Database*  
37 *Syst Rev* 2009;1:1-60.  
38  
39 31. Campinha-Bacote J. The process of cultural competence in the delivery of healthcare  
40 services: A model of care. *J Transcult Nurs* 2002;13(3):181-184.  
41  
42  
43  
44  
45  
46  
47  
48  
49  
50  
51  
52  
53  
54  
55  
56  
57  
58  
59  
60

1  
2  
3  
4  
5  
6  
7  
8  
9  
10  
11  
12  
13  
14  
15  
16  
17  
18  
19  
20  
21  
22  
23  
24  
25  
26  
27  
28  
29  
30  
31  
32  
33  
34  
35  
36  
37  
38  
39  
40  
41  
42  
43  
44  
45  
46  
47  
48  
49  
50  
51  
52  
53  
54  
55  
56  
57  
58  
59  
60

For peer review only

## Tables

**Table 1: Demographic information**

|                                               | <b>All<br/>participants<br/>(n=191)</b> | <b>Portugal<br/>(n=55)</b> | <b>India<br/>(n=78)</b> | <b>Iran<br/>(n=58)</b> |
|-----------------------------------------------|-----------------------------------------|----------------------------|-------------------------|------------------------|
| <b>Age in years (Mean±SD)</b>                 | 30.9±8.4                                | 31.0±8.4                   | 29.6±8.6                | 32.5±8.0               |
| <b>Gender (%)</b>                             |                                         |                            |                         |                        |
| ▪ Male                                        | 37                                      | 20                         | 55                      | 30                     |
| ▪ Female                                      | 63                                      | 80                         | 45                      | 70                     |
| <b>Work set-up (%)</b>                        |                                         |                            |                         |                        |
| ▪ Clinic public                               | 35                                      | 23                         | 39                      | 41                     |
| ▪ Clinic private                              | 50                                      | 51                         | 61                      | 33                     |
| ▪ Clinic both                                 | 12                                      | 15                         | 0                       | 26                     |
| ▪ Education                                   | 1                                       | 2                          | 0                       | 0                      |
| ▪ Not known                                   | 2                                       | 9                          | 0                       | 0                      |
| <b>Education (%)</b>                          |                                         |                            |                         |                        |
| ▪ Bachelors                                   | 47                                      | 72                         | 18                      | 60                     |
| ▪ Masters                                     | 48                                      | 22                         | 74                      | 40                     |
| ▪ Doctorate                                   | 5                                       | 6                          | 8                       | 0                      |
| <b>Work experience in years<br/>(Mean±SD)</b> | 7.2±8.1                                 | 7.8±8.2                    | 6.1±8.8                 | 8.1±6.5                |

**Table 2: Modified patient practitioner orientation scale (PPOS): Mean scores and standard deviation**

|                                                                                                                          | All participants<br>(n=191) | Portugal<br>(n=55) | India<br>(n=78) | Iran<br>(n=58) |
|--------------------------------------------------------------------------------------------------------------------------|-----------------------------|--------------------|-----------------|----------------|
| <b>PPOS Items (Mean±SD)</b>                                                                                              |                             |                    |                 |                |
| 1. The audiologist is the one who should decide what gets talked about during an appointment.                            | 2.4±1.1                     | 2.4±1.2            | 2.3±1.2         | 2.5±1.2        |
| 2. Although health care is less personal these days, this is a small price to pay for audiological advances.             | 3.0±1.4                     | 4.3±1.2            | 2.7±1.2         | 2.1±1.0        |
| 3. The most important part of the standard audiological appointment is the hearing test.                                 | 2.7±1.4                     | 3.4±1.2            | 2.5±1.5         | 2.3±1.1        |
| 4. It is often best for clients if they do not have the full explanation of their audiological condition.                | 4.6±1.3                     | 5.0±1.0            | 4.5±1.5         | 4.2±1.3        |
| 5. Clients should rely on their audiologists' knowledge and not try to find out about their conditions on their own.     | 3.2±1.7                     | 4.2±1.4            | 3.4±1.6         | 2.0±1.3        |
| 6. When audiologists ask a lot of questions about a client's background, they are prying too much into personal matters. | 4.4±1.3                     | 5.0±1.0            | 4.0±1.3         | 4.2±1.4        |
| 7. If audiologists are truly good at diagnosis and treatment, the way they relate to clients is not that important.      | 4.8±1.2                     | 5.5±0.7            | 4.4±1.3         | 4.6±1.2        |
| 8. Many clients continue asking questions even though they are not learning anything new.                                | 3.2±1.2                     | 3.4±1.2            | 3.2±1.2         | 3.0±1.2        |
| 9. Clients should be treated as if they were partners with the audiologist, equal in power and status.*                  | 4.1±1.6                     | 4.7±1.6            | 3.7±1.5         | 4.0±1.5        |
| 10. Clients generally want reassurance rather than information about their audiological condition.                       | 2.8±1.1                     | 3.3±1.0            | 2.7±1.1         | 2.5±1.1        |
| 11. If an audiologist's primary tools are being open and warm, the audiologist will not have a lot of success.           | 4.3±1.4                     | 4.6±1.1            | 3.8±1.4         | 4.6±1.3        |

|                                                                                                                                     |         |         |         |         |
|-------------------------------------------------------------------------------------------------------------------------------------|---------|---------|---------|---------|
| 12. When clients disagree with their audiologist, this is a sign that the audiologist does not have the client's respect and trust. | 3.8±1.2 | 4.6±1.0 | 3.7±1.1 | 3.1±1.2 |
| 13. A management plan cannot succeed if it is in conflict with a client's lifestyle or values.*                                     | 4.7±1.1 | 4.7±1.1 | 4.6±1.0 | 4.7±1.2 |
| 14. Most clients want to get in and out of the audiologist's office as quickly as possible.                                         | 3.5±1.4 | 4.4±1.2 | 3.3±1.2 | 2.9±1.3 |
| 15. The client must always be aware that the audiologist is in charge.                                                              | 2.6±1.3 | 2.7±1.2 | 2.4±1.1 | 2.9±1.5 |
| 16. It is not that important to know a client's culture and background in order to treat the client's audiological condition.       | 4.6±1.3 | 5.3±0.9 | 4.3±1.4 | 4.6±1.2 |
| 17. Humour is a major ingredient in the audiologist's management of the client.*                                                    | 4.1±1.3 | 4.8±1.0 | 3.8±1.3 | 3.8±1.4 |
| 18. When clients look up audiological information on their own, this usually confuses more than it helps.                           | 2.9±1.3 | 2.6±1.0 | 2.8±1.4 | 3.4±1.3 |
| <b>PPOS Scales (Mean±SD)</b>                                                                                                        |         |         |         |         |
| ▪ Full scale                                                                                                                        | 3.6±0.6 | 4.2±0.5 | 3.5±0.6 | 3.4±0.4 |
| ▪ Sharing subscale                                                                                                                  | 3.6±0.7 | 4.2±0.6 | 3.4±0.7 | 3.2±0.5 |
| ▪ Caring subscale                                                                                                                   | 3.7±0.6 | 4.1±0.5 | 3.5±0.5 | 3.6±0.5 |

**Note:** Score of 1 (strongly agree) = most clinician-centred; Score of 6 (strongly disagree) = most patient-centred. Items 9, 13 and 17 (\*) are reversely worded items which were reverse scored.

**Table 3: Differences in audiologists' preferences for patient-centredness between countries**

|                   | Degree of freedom | F-test | P       |
|-------------------|-------------------|--------|---------|
| <b>Sharing</b>    | 2                 | 39.76  | < 0.001 |
| <b>Caring</b>     | 2                 | 24.61  | < 0.001 |
| <b>Full scale</b> | 2                 | 42.49  | < 0.001 |

1  
2  
3  
4  
5  
6  
7  
8  
9  
10  
11  
12  
13  
14  
15  
16  
17  
18  
19  
20  
21  
22  
23  
24  
25  
26  
27  
28  
29  
30  
31  
32  
33  
34  
35  
36  
37  
38  
39  
40  
41  
42  
43  
44  
45  
46  
47  
48  
49  
50  
51  
52  
53  
54  
55  
56  
57  
58  
59  
60

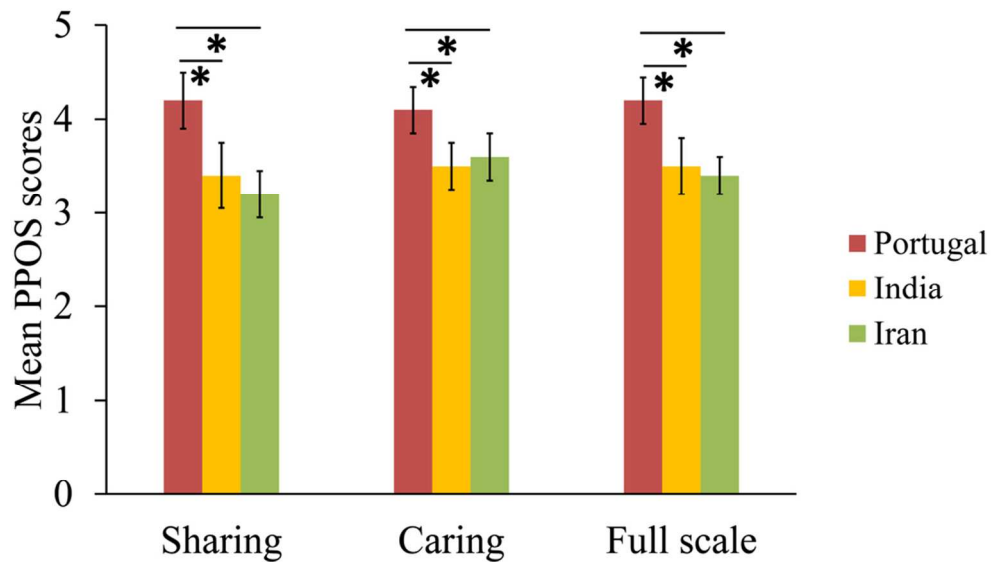

Bar Graphs showing the mean total PPOS Score ('Full Scale'), and the mean PPOS Score for the 'Sharing' and 'Caring' Subscales for Audiologists from Portugal, India and Iran. (\*) indicates a significant difference (P<0.01)  
92x52mm (300 x 300 DPI)

review only

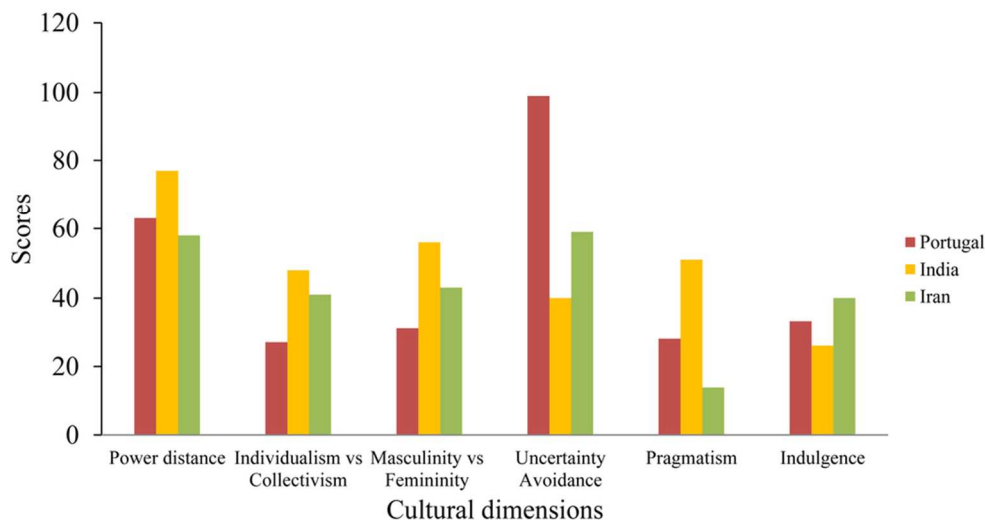

Bar graph showing Hofstede's cultural dimension values for Portugal, India and Iran. A high score power distance expresses that the less powerful members of a society accept and expect that power is distributed unequally. A high score on Individualism vs Collectivism can be defined as a preference for a loosely-knit social framework in which individuals are expected to take care of only themselves and their immediate families. A high score on 'Masculinity vs Femininity' suggests a preference in society for achievement, heroism, assertiveness and material rewards for success as opposed to cooperation, modesty, caring for the weak and quality of life. A high score on 'Uncertainty Avoidance' suggests members of a society feel uncomfortable with uncertainty and ambiguity. A high score on 'Pragmatism' suggests the society encourages thrift and efforts in modern education as a way to prepare for the future, as opposed to relying on time-honoured traditions. A high score on 'Indulgence' suggests the society follows gratification of basic and natural human drives related to enjoying life and having fun, as opposed to restrain in such activities based on social norms.

90x47mm (300 x 300 DPI)



**STROBE 2007 (v4) checklist of items to be included in reports of observational studies in epidemiology\***  
**Checklist for cohort, case-control, and cross-sectional studies (combined)**

| Section/Topic                | Item # | Recommendation                                                                                                                                                                       | Reported on page # |
|------------------------------|--------|--------------------------------------------------------------------------------------------------------------------------------------------------------------------------------------|--------------------|
| <b>Title and abstract</b>    | 1      | (a) Indicate the study's design with a commonly used term in the title or the abstract                                                                                               | 1                  |
|                              |        | (b) Provide in the abstract an informative and balanced summary of what was done and what was found                                                                                  | 2 & 3              |
| <b>Introduction</b>          |        |                                                                                                                                                                                      |                    |
| Background/rationale         | 2      | Explain the scientific background and rationale for the investigation being reported                                                                                                 | 4 – 6              |
| Objectives                   | 3      | State specific objectives, including any prespecified hypotheses                                                                                                                     | 6                  |
| <b>Methods</b>               |        |                                                                                                                                                                                      |                    |
| Study design                 | 4      | Present key elements of study design early in the paper                                                                                                                              | 7                  |
| Setting                      | 5      | Describe the setting, locations, and relevant dates, including periods of recruitment, exposure, follow-up, and data collection                                                      | 7                  |
| Participants                 | 6      | (a) Give the eligibility criteria, and the sources and methods of selection of participants                                                                                          | 7                  |
| Variables                    | 7      | Clearly define all outcomes, exposures, predictors, potential confounders, and effect modifiers. Give diagnostic criteria, if applicable                                             | 7 – 8              |
| Data sources/<br>measurement | 8*     | For each variable of interest, give sources of data and details of methods of assessment (measurement). Describe comparability of assessment methods if there is more than one group | 7 - 8              |
| Bias                         | 9      | Describe any efforts to address potential sources of bias                                                                                                                            | 7 & 15             |
| Study size                   | 10     | Explain how the study size was arrived at                                                                                                                                            | 7                  |
| Quantitative variables       | 11     | Explain how quantitative variables were handled in the analyses. If applicable, describe which groupings were chosen and why                                                         | 8                  |
| Statistical methods          | 12     | (a) Describe all statistical methods, including those used to control for confounding                                                                                                | 8                  |
|                              |        | (b) Describe any methods used to examine subgroups and interactions                                                                                                                  | 8                  |
|                              |        | (c) Explain how missing data were addressed                                                                                                                                          | NA                 |
|                              |        | (d) If applicable, describe analytical methods taking account of sampling strategy                                                                                                   | 8                  |
|                              |        | (e) Describe any sensitivity analyses                                                                                                                                                | 8                  |
| <b>Results</b>               |        |                                                                                                                                                                                      |                    |

|                          |     |                                                                                                                                                                                                              |         |
|--------------------------|-----|--------------------------------------------------------------------------------------------------------------------------------------------------------------------------------------------------------------|---------|
| Participants             | 13* | (a) Report numbers of individuals at each stage of study—eg numbers potentially eligible, examined for eligibility, confirmed eligible, included in the study, completing follow-up, and analysed            | 9       |
|                          |     | (b) Give reasons for non-participation at each stage                                                                                                                                                         | NA      |
|                          |     | (c) Consider use of a flow diagram                                                                                                                                                                           | NA      |
| Descriptive data         | 14* | (a) Give characteristics of study participants (eg demographic, clinical, social) and information on exposures and potential confounders                                                                     | 9 & 21  |
|                          |     | (b) Indicate number of participants with missing data for each variable of interest                                                                                                                          | NA      |
| Outcome data             | 15* | Report numbers of outcome events or summary measures                                                                                                                                                         | 9 - 11  |
| Main results             | 16  | (a) Give unadjusted estimates and, if applicable, confounder-adjusted estimates and their precision (eg, 95% confidence interval). Make clear which confounders were adjusted for and why they were included | 9 - 11  |
|                          |     | (b) Report category boundaries when continuous variables were categorized                                                                                                                                    | 9 - 11  |
|                          |     | (c) If relevant, consider translating estimates of relative risk into absolute risk for a meaningful time period                                                                                             | 9 - 11  |
| Other analyses           | 17  | Report other analyses done—eg analyses of subgroups and interactions, and sensitivity analyses                                                                                                               | 9 - 11  |
| <b>Discussion</b>        |     |                                                                                                                                                                                                              |         |
| Key results              | 18  | Summarise key results with reference to study objectives                                                                                                                                                     | 11 - 13 |
| Limitations              | 19  | Discuss limitations of the study, taking into account sources of potential bias or imprecision. Discuss both direction and magnitude of any potential bias                                                   | 15      |
| Interpretation           | 20  | Give a cautious overall interpretation of results considering objectives, limitations, multiplicity of analyses, results from similar studies, and other relevant evidence                                   | 13 - 15 |
| Generalisability         | 21  | Discuss the generalisability (external validity) of the study results                                                                                                                                        | 13 - 15 |
| <b>Other information</b> |     |                                                                                                                                                                                                              |         |
| Funding                  | 22  | Give the source of funding and the role of the funders for the present study and, if applicable, for the original study on which the present article is based                                                | 16      |

\*Give information separately for cases and controls in case-control studies and, if applicable, for exposed and unexposed groups in cohort and cross-sectional studies.

**Note:** An Explanation and Elaboration article discusses each checklist item and gives methodological background and published examples of transparent reporting. The STROBE checklist is best used in conjunction with this article (freely available on the Web sites of PLoS Medicine at <http://www.plosmedicine.org/>, Annals of Internal Medicine at <http://www.annals.org/>, and Epidemiology at <http://www.epidem.com/>). Information on the STROBE Initiative is available at [www.strobe-statement.org](http://www.strobe-statement.org).

# BMJ Open

## **Audiologists' preferences for patient-centredness: A cross-sectional questionnaire study of cross-cultural differences and similarities among professionals in Portugal, India and Iran**

|                                 |                                                                                                                                                                                                                                                                                                                                                                                                                             |
|---------------------------------|-----------------------------------------------------------------------------------------------------------------------------------------------------------------------------------------------------------------------------------------------------------------------------------------------------------------------------------------------------------------------------------------------------------------------------|
| Journal:                        | <i>BMJ Open</i>                                                                                                                                                                                                                                                                                                                                                                                                             |
| Manuscript ID:                  | bmjopen-2014-005915.R2                                                                                                                                                                                                                                                                                                                                                                                                      |
| Article Type:                   | Research                                                                                                                                                                                                                                                                                                                                                                                                                    |
| Date Submitted by the Author:   | 11-Sep-2014                                                                                                                                                                                                                                                                                                                                                                                                                 |
| Complete List of Authors:       | Gomersall, Philip; Anglia Ruskin University, Department of Vision and Hearing Sciences<br>Manchaiah, Vinaya; Anglia Ruskin University, Department of Vision and Hearing Sciences<br>Tomé, David; Polytechnic Institute of Porto, Audiology<br>Ahmadi, Tayebah; University of Social Welfare and Rehabilitation Sciences, Audiology<br>Krishna, Rajalakshmi; University of Mysore, All India Institute of Speech and Hearing |
| <b>Primary Subject Heading</b>: | Patient-centred medicine                                                                                                                                                                                                                                                                                                                                                                                                    |
| Secondary Subject Heading:      | Ear, nose and throat/otolaryngology                                                                                                                                                                                                                                                                                                                                                                                         |
| Keywords:                       | Audiology < OTOLARYNGOLOGY, International health services < HEALTH SERVICES ADMINISTRATION & MANAGEMENT, MEDICAL EDUCATION & TRAINING                                                                                                                                                                                                                                                                                       |
|                                 |                                                                                                                                                                                                                                                                                                                                                                                                                             |

SCHOLARONE™  
Manuscripts

1  
2  
3  
4 **Audiologists' preferences for patient-centredness: A cross-**  
5  
6  
7 **sectional questionnaire study of cross-cultural differences and**  
8  
9  
10 **similarities among professionals in Portugal, India and Iran**  
11  
12  
13

14 **Vinaya Manchaiah<sup>1,2</sup>, Philip A. Gomersall<sup>1</sup>, David Tomé<sup>3</sup>, Tayebah Ahmadi<sup>4</sup> &**  
15  
16 **Rajalakshmi Krishna<sup>5</sup>**  
17

- 18  
19  
20 1. Department of Vision and Hearing Sciences, Anglia Ruskin University, Cambridge,  
21 United Kingdom  
22  
23 2. Linnaeus Centre HEAD, Department of Behavioral Sciences and Learning, The  
24 Swedish Institute for Disability Research, Linköping University, Linköping, Sweden  
25  
26 3. Department of Audiology, School of Allied Health Sciences, Polytechnic Institute of  
27 Porto, Vila Nova de Gaia, Portugal  
28  
29 4. Department of Audiology, University of Social Welfare and Rehabilitation Sciences,  
30 Tehran, Iran  
31  
32 5. All India Institute of Speech and Hearing, University of Mysore, Mysore, India  
33  
34  
35  
36  
37  
38  
39  
40  
41

42 **Corresponding Author:** Philip A. Gomersall

43  
44 **Address:** Department of Vision and Hearing Sciences, Coslett 204, Anglia Ruskin  
45 University, Cambridge CB1 1PT, United Kingdom  
46

47  
48 **Email:** [phil.gomersall@anglia.ac.uk](mailto:phil.gomersall@anglia.ac.uk); **Tel:** +44 (0)1223 698653  
49  
50  
51  
52  
53  
54  
55  
56  
57  
58  
59  
60

**Key Words**

Patient-centeredness, Audiology, hearing healthcare, cross-culture

For peer review only

## Abstract

**Objective:** Patient-centredness has become one of the important aspects of health service delivery, however, a limited number of studies exist that focus on this concept in the domain of hearing healthcare. The objective of this study was to examine and compare audiologists' preferences for patient-centredness in Portugal, India and Iran.

**Design:** The study used a cross-sectional survey design with audiologists recruited from three different countries.

**Participants:** A total of 191 fully-completed responses were included in the analysis (55 from Portugal, 78 from India and 58 from Iran).

**Main outcome measure:** The Patient-Practitioner Orientation Scale.

**Results:** Patient-Practitioner Orientation Scale mean scores suggest that Audiologists have a preference for patient-centredness (i.e., mean of 3.6 in 5 point scale). However, marked differences were observed between specific PPOS items suggesting these preferences vary across clinical situations. A significant level of difference ( $p < 0.001$ ) was found between audiologists' preferences for patient-centredness in three countries. Audiologists in Portugal had a greater preference for patient-centredness when compared to audiologists in India and Iran, although no significant differences were found in terms of age and duration of experience among these sample populations.

**Conclusion:** There are differences and similarities in audiologists' preferences for patient-centredness among countries. These findings may have implications for the training of professionals and also for clinical practice in terms of optimising hearing healthcare across countries.

## Summary

### Article Focus

- To examine and compare audiologists' preferences for patient-centredness in Portugal, India and Iran.

### Key Message

- A significant level of difference was found between audiologists' preferences for patient-centredness in three countries.
- Audiologists in Portugal had a greater preference for patient-centredness when compared to audiologists in India and Iran.
- These findings may have implications for the training of professionals and for clinical practice in terms of optimising hearing healthcare across countries.

### Strengths and Weakness

- A response rate of 76% was obtained for this questionnaire-based study and there was diversity in the data from audiologists distributed across three countries.
- Some variables such as differing healthcare delivery models and educational systems were not controlled for, and may have contributed to the differences and similarities noticed in audiologists preferences.
- A sampling bias may have been present, since audiologists with particular preferences may have been more inclined to respond to the questionnaire.
- The fact that identifiable information may have been present in the emailed responses had the potential to influence/discourage an individual's response.

## Introduction

There has been an increase in advocacy towards patients' involvement in their health and care delivery, hence the concept 'patient-centredness' has received much attention over the past few decades<sup>1</sup>. Patient-centeredness involves aspects such as increased importance placed on patient participation, self-determination of patients in their healthcare (i.e., the rights and abilities of patients to make their own choices and decisions about the medical care they receive), and the creation of a power-balanced therapeutic relationship between patients and professionals<sup>2</sup>. Although there has been little consensus over the meaning of this concept universally, patient-centredness has been described in the field of general practice with five main dimensions: (1) biopsychosocial perspective; (2) patient as a person; (3) shared knowledge and power; (4) therapeutic alliance; and (5) clinician as a person<sup>1</sup>. Patient-centeredness has been suggested to be fundamental part of the successful management of chronic health conditions<sup>3</sup>.

Studies from a variety of areas of healthcare (including oncology, skin disorders, amyotrophic lateral sclerosis) have suggested that the health professional's preferences towards patient-centeredness is important in determining outcomes, including patient satisfaction<sup>4-7</sup>. A shortfall in patient-centeredness has also been linked to malpractice claims<sup>8</sup>, and in general a measured preference for patient-centeredness correlates well with clinical practices such as open communication and a positive rapport between patient and clinician<sup>9</sup>.

The profession of Audiology is particularly interesting in this context since, traditionally, there has been a focus on the technological aspects of hearing healthcare<sup>10</sup>. Some researchers believe that the last two decades has seen a paradigm shift; moving from a focus



1  
2  
3  
4 on the technological aspects of hearing healthcare to a more person-centred approach to  
5  
6 rehabilitation<sup>10 11</sup>. The empirical evidence for this shift is limited, with only a small number  
7  
8 of published studies on patient-centeredness specific to audiology: Grenness et al.<sup>12</sup> studied  
9  
10 the views of older adults who own hearing aids in order to further define patient-centred care  
11  
12 in the context of audiological rehabilitation. Interviews were conducted with ten older adults  
13  
14 with hearing aids, exploring their views and the data were analysed using qualitative content  
15  
16 analysis. The results suggested three dimensions: (1) the therapeutic relationship; (2) the  
17  
18 players - patient and audiologist; and (3) the clinical process, and an overarching theme of  
19  
20 individualised care specific to audiological rehabilitation.  
21  
22  
23

24  
25  
26 A recent study focussing specifically on Audiologists in Australia found that they report a  
27  
28 high preference for patient-centredness<sup>13</sup>. Moreover, demographic factors such as age,  
29  
30 duration of work experience and employment type (i.e., public/ private) acted as influencing  
31  
32 factors towards explaining patient-centredness. For example, older audiologists and those  
33  
34 who had practiced longer had a significantly greater preference for patient-centeredness when  
35  
36 compared to younger and less-experienced audiologists. This is the only published study that  
37  
38 has explicitly explored audiologists' preferences towards patient-centredness.  
39

40  
41 Two further studies have been conducted in the field of Audiology that, whilst not explicitly  
42  
43 focusing on patient centeredness as a distinct entity, are highly relevant: Laplante-Lévesque  
44  
45 et al conducted a qualitative study, exploring shared decision making in adults with acquired  
46  
47 hearing impairment, which suggested that patients wanted rehabilitative audiologists to hear  
48  
49 their experiences and preferences and to tailor their interventions accordingly<sup>14</sup>. Poost-  
50  
51 Foroosh et al.<sup>15</sup> studied the factors in the interaction between Audiologists and clients in the  
52  
53 decision to purchase a hearing aid. The study asked twelve clients with acquired hearing loss  
54  
55 and ten audiologists, from both University and private practices, to supply statements  
56  
57  
58  
59  
60

1  
2  
3  
4 regarding which clinician-patient factors they felt influenced the decision to purchase a  
5  
6 hearing aid. Client-centred interaction was identified as one of two major themes in the  
7  
8 responses provided (client-empowerment was the other).  
9

10  
11  
12 In all cases, the research discussed above consistently demonstrates the significant value that  
13  
14 patients place in the relationship with the clinician. Across the studies it can be seen that  
15  
16 different clinician-specific factors were found to influence the degree of patient-centeredness.  
17  
18 As of yet there is little strong evidence for improved rehabilitation outcomes, although  
19  
20 hearing aid purchase was observed to be positively influenced by more client-centred  
21  
22 practice. The reader is referred to a recent literature review by Grenness et al.<sup>2</sup> for further  
23  
24 details on patient-centred care in relation to rehabilitative Audiology.  
25  
26  
27  
28  
29

30  
31 Given the clinician-specific differences observed in the studies discussed above, and the fact  
32  
33 that Audiology practices vary considerably across countries<sup>16</sup>, it would be useful to examine  
34  
35 audiologists' preferences for patient-centeredness across different countries which vary in  
36  
37 terms of culture and healthcare systems. Moreover; it has been highlighted in general that  
38  
39 there are few cross-cultural studies in the area of hearing healthcare, highlighting the need for  
40  
41 such studies<sup>18</sup>  
42  
43  
44  
45

46 Cultural competence is a key aspect that is known to influence healthcare quality<sup>17 18</sup>. We  
47  
48 hypothesise that the present culture to which an individual is exposed, as well as their cultural  
49  
50 background, can influence both patients' and providers' preferences in healthcare and  
51  
52 towards patient-centredness. We were particularly interested in understanding and comparing  
53  
54 the preferences for patient-centeredness among Audiologists in European and Asian  
55  
56 countries. Asian countries, compared to European countries, are considered to be more  
57  
58  
59  
60

1  
2  
3  
4 collectivist societies, with a greater emphasis placed on the role of the individual as part of a  
5  
6 local group and/or community with less of a tendency to focus on ‘looking after oneself’<sup>24</sup>.  
7

8  
9 Further to this, it has been posited that Asian countries have a tendency towards a high  
10  
11 ‘power distance’ within levels of organisations – this reflects how willing the less powerful  
12  
13 members of an organisation or group are to accept an unequal distribution of power<sup>24</sup>. In the  
14  
15 context of patient-centredness such cultural effects might result in different opinions towards  
16  
17 a hierarchical ‘paternalistic’ approach to audiological management (where the clinician may  
18  
19 display an attitude of superiority over the patient), versus a patient centred-approach.  
20  
21

22  
23  
24  
25  
26 The aim of the current study was to examine and compare audiologists’ preferences for  
27  
28 patient-centredness in Portugal, India and Iran. These countries vary in terms of healthcare  
29  
30 system, culture and socio-economic status. However, they were chosen as they all have a  
31  
32 minimum educational level requirement of a Bachelor’s degree education for Audiologists,  
33  
34 and also due to convenience in data collection.  
35  
36  
37  
38  
39

## 40 **Method**

### 41 *Ethical Considerations*

42  
43 Ethical approval was obtained from the *School of Allied Health Sciences, Polytechnic*  
44  
45 *Institute of Porto* at Porto and *All India Institute of Speech and Hearing* at Mysore for data  
46  
47 collection in Portugal and India respectively. This kind of study did not require ethical  
48  
49 approval under the *Department of Audiology, University of Social Welfare and Rehabilitation*  
50  
51 *Sciences* at Tehran for data collection in Iran.  
52  
53  
54  
55  
56  
57

### 58 *Study Design and Participants*

1  
2  
3  
4 The current study used a cross-sectional survey design and purposive sampling to recruit  
5  
6 participants. The email mailing list was obtained from university and professional  
7  
8 associations which consisted of audiologists distributed throughout each of the three  
9  
10 countries. The Patient-Practitioner Orientation Scale (PPOS) questionnaire, with some  
11  
12 additional demographics questions (i.e., age, gender, number of years of experience, work  
13  
14 set-up, country of origin and country in which currently practicing), was sent to 260  
15  
16 Audiologists (80 in Portugal, 110 in India and 70 in Iran) via email, requesting them to  
17  
18 complete and return back to the researcher by email. Two email reminders were sent for non-  
19  
20 respondents after two and four weeks respectively. As the Email ID might have contained  
21  
22 some information that may have helped identify the individual, the survey was not fully  
23  
24 anonymous. In the interest of keeping the survey short, only limited demographic information  
25  
26 was requested and the choice was made to consider the most important aspects based on the  
27  
28 findings of the previous studies<sup>12-14</sup>, as discussed in the introduction.  
29  
30  
31  
32  
33  
34

### 35 *Questionnaire*

36  
37 The PPOS was developed by Krupat et al.<sup>19</sup> to study physician preferences towards patient-  
38  
39 centredness. However, a modified version of the PPOS that has previously been used to study  
40  
41 audiologists' preferences towards patient-centredness was used in the current study<sup>13</sup>. This  
42  
43 modified version of the PPOS was found to have acceptable internal consistency ( $\alpha = 0.78$ ).  
44  
45 This scale has eighteen questions which are scored on a 6-point Likert scale (1 = strongly  
46  
47 agree; 6 = strongly disagree). The total score ranges from 18 (most audiologist-centred) to  
48  
49 108 (most patient-centred), and there are two sub-scales: The first nine-item sub-scale,  
50  
51 *sharing*, reflects the extent to which the respondent believes that patients desire information  
52  
53 and should be part of the decision making process (e.g., patients should be treated as if they  
54  
55 were partners with the audiologists, equal in power and status). The other nine-item sub-  
56  
57  
58  
59  
60

1  
2  
3  
4 scale, *caring*, reflects the extent to which the respondent sees the patient's expectations,  
5  
6 feelings, and life circumstances as critical elements in the treatment process (e.g., a treatment  
7  
8 plan cannot succeed if it is in conflict with a patient's lifestyle or values).  
9

10  
11  
12 An English version of the questionnaire was administered in India. Portuguese and Farsi  
13 translated versions were used in Portugal and Iran respectively. The questionnaire translation  
14  
15 process was aimed at achieving different language versions of the English instrument that are  
16  
17 conceptually equivalent in each of the target countries/cultures. That is, the focus was on  
18  
19 cross-cultural and conceptual, rather than on linguistic/literal equivalence. We followed the  
20  
21 well accepted forward-translations and back-translations method<sup>20</sup>. This process involved  
22  
23 four main stages: forward translation; expert back translation; review and resolution of any  
24  
25 discrepancies; and pre-testing with five participants each, in both Portugal and Iran.  
26  
27  
28  
29  
30  
31  
32

### 33 **Data Analysis**

34  
35 In the first instance, descriptive statistics (i.e., mean, standard deviation), a test of normality  
36  
37 and a test of homogeneity of variance were performed. Mean total PPOS scores for  
38  
39 audiologists from three countries were compared using an independent one-way analysis of  
40  
41 variance (ANOVA). An alpha level of 0.01 was used to determine significance. Bonferroni  
42  
43 *post-hoc* analysis was performed to further examine the relationship between groups. Further,  
44  
45 a one-way analysis of covariance (ANCOVA) was performed with age and duration of work  
46  
47 experience as covariates in order to exclude the influence of these variables on the observed  
48  
49 differences between the group means.  
50  
51  
52  
53  
54

### 55 **Results**

56  
57  
58  
59  
60

1  
2  
3  
4 A total of 198 responses (response rate of 76%) were received. This included: 55 responses  
5  
6 from Portugal (response rate of 69%); 82 responses from India (response rate of 75%); and  
7  
8 61 responses from Iran (response rate of 87%). However, three responses from Iran  
9  
10 (incomplete data) and four responses from India (audiologists currently practicing in a  
11  
12 different country) were excluded. A total of 191 responses (i.e., 73%) were included in the  
13  
14 analysis (55 from Portugal, 78 from India and 58 from Iran). Table 1 presents the  
15  
16 demographic information and Table 2 presents PPOS scores. ANOVA showed no difference  
17  
18 between groups in terms of age [ $F(2, 188) = 2.13, p = 0.121$ ] and also duration of work  
19  
20 experience [ $F(2, 188) = 1.16, p = 0.313$ ].  
21  
22

23  
24 [Table 1 near here]

25  
26 [Table 2 near here]  
27  
28  
29

30  
31 Data for both full-scale and subscales were found to be normally distributed (based on  
32  
33 Kolmogorov-Smirnov test and visual examination of histograms). Homogeneity of variances  
34  
35 (based on Levene's test) was found for *caring* and *total mean* ( $p = 0.625$  and  $0.129$   
36  
37 respectively) and not for *sharing* ( $p = 0.020$ ). Since our data were found to be normally  
38  
39 distributed, we elected to use ANOVA for our analysis, despite the fact that homogeneity of  
40  
41 variances could not be assumed for the *sharing* subscale. A robust procedures (Welch and  
42  
43 Brown-Forsythe) test was performed to check ANOVA findings which indicated the same  
44  
45 significant differences between group means ( $p < 0.001$  in all cases).  
46  
47  
48

49  
50 The PPOS mean scores from each population were analysed using a one way between-  
51  
52 subjects ANOVA (see Table 3). A significant result was found for *sharing* subscale [ $F(2,$   
53  
54  $188) = 39.76$ ], *caring* subscale [ $F(2, 188) = 24.61$ ] and the *full scale* [ $F(2, 188) = 42.49$ ].  
55  
56 Further, *post-hoc* tests with Bonferroni correction showed that the difference between  
57  
58  
59  
60

1  
2  
3  
4 Portugal and India and also Portugal and Iran were significant for *sharing* subscale, *caring*  
5 subscale and *full* scale ( $p = 0.001$ ,  $0.001$  and  $0.001$  respectively). However, the difference  
6  
7  
8 between India and Iran were not statistically significant for the *sharing* subscale, *caring*  
9 subscale and *full* scale ( $p = 0.171$ ,  $p = 0.841$  and  $p = 1$  respectively).  
10  
11  
12

13  
14  
15 **[Table 3 near here]**  
16  
17

18  
19 These results show some differences and some similarities in audiologists' preferences  
20 towards patient-centredness from different countries (see Figure 1). Audiologists in Portugal  
21 had significantly greater preference for patient-centredness when compared to audiologists in  
22 India and Iran whose preferences did not differ much.  
23  
24  
25  
26  
27  
28

29  
30 **[Figure 1 near here]**  
31  
32

33  
34  
35 Whilst our sample populations were well matched, with no significant differences with  
36 respect to age and experience, this does not exclude some possible influence of these  
37 variables on the data. Therefore we elected to include these variables as covariates, and assess  
38 if this had an influence on the main effect observed: The data met the necessary assumptions  
39 (i.e., linearity, homoscedasticity and homogeneity of regression slopes) and the ANCOVA  
40 results with age and duration of work experience as covariates and PPOS scores as dependent  
41 variable gave results consistent with the ANOVA, with a significant main effect for the full  
42 scale and subscales only and no significant interaction was observed. Thus we conclude that  
43 differences exist between the responses from audiologists from these countries in preference  
44 for patient-centredness, even after accounting for age and duration of work experience.  
45  
46  
47  
48  
49  
50  
51  
52  
53  
54  
55  
56  
57  
58  
59  
60

## Discussion

This study examined and compared audiologists' preferences for patient-centredness in Portugal, India and Iran. The PPOS scores indicate the self-reported preference for patient-centeredness. An overall mean score per item of greater than 3 for all three countries included suggests that there is a tendency for Audiologists to favour patient-centredness, rather than a clinician-centred approach. This is true for both *caring* and *sharing* subscales. These values can be compared to those observed across other medical specialities<sup>5</sup>. For example, general practitioners and oncology physicians had higher PPOS mean scores (i.e., 4.3 and 5.0 respectively) when compared with physicians with a surgical background (i.e., 2.9). Thus, in general it appears that patient-centred practices vary depending upon the specific duties of the professional. We hypothesise that this could be linked to differences in training routes for medical subspecialties, in combination with the expectation of the role fulfilled by the clinician within their speciality. This is of relevance to Audiology, since training routes vary between countries, with education provision that may follow either a medical, scientific, technician, para-medical model (or a combination thereof)<sup>21</sup>.

From examination of the responses to each item it can be seen that audiologists' preferences for patient-centredness vary depending upon the situation described (see Table 2). For example *item 1* (i.e., audiologist is the one who should decide what gets talked about during an appointment), *item 2* (i.e., most important part of the standard audiological appointment is the hearing test), *item 10* (i.e., clients generally want reassurance rather than information about their audiological condition), and *item 15* (i.e., client must always be aware that the audiologist is in charge) show markedly lower mean scores (2.4-2.8) than the mean PPOS scores (4.6-4.8) in *item 4* (i.e., it is often best for clients if they do not have the full explanation of their audiological condition), *item 7* (i.e., if audiologists are truly good at



1  
2  
3  
4 diagnosis and treatment, the way they relate to clients is not that important) and *item 13* (i.e.,  
5 a management plan cannot succeed if it is in conflict with a client's lifestyle or values). The  
6 content of the items showing a lower mean score are consistent with traditional audiological  
7 practices focusing on application of diagnostic testing, diagnosis and *treatment*, whereas the  
8 other items with higher mean scores are more explicit on their focus towards rehabilitation  
9 (using terms such as 'management plans', and words such as 'relate'). Similar patterns of  
10 PPOS results have been reported in a recent Australian study<sup>13</sup>. Thus it appears that an  
11 audiologist's views towards patient-centeredness vary depending whether they are  
12 considering their diagnostic or rehabilitative roles, and this is shared across countries. Some  
13 researchers suggest that there is a growing trend towards a greater role of client-centred  
14 rehabilitation by audiologists<sup>10, 11</sup>. Therefore; it may be useful to monitor Audiologists'  
15 preferences for patient-centeredness over time.  
16  
17  
18  
19  
20  
21  
22  
23  
24  
25  
26  
27  
28  
29  
30  
31  
32

33 The study results suggest some country-specific differences and some similarities in the  
34 overall preference for patient-centeredness among audiologists from Portugal ( $M = 4.2$ ;  $SD =$   
35  $0.5$ ), India ( $M = 3.5$ ;  $SD = 0.6$ ) and Iran ( $M = 3.4$ ;  $SD = 0.4$ ). Generally, audiologists' in  
36 Portugal had a high preference for patient-centredness, when compared to audiologists in  
37 India and Iran. Moreover, a recent study found that Australian audiologists<sup>14</sup> have high  
38 preference for patient-centredness ( $M = 4.46$ ;  $SD = 0.52$ ), which is similar to Portugal  
39 audiologists' preferences reported in the current study. As discussed later, there are a number  
40 of possible factors that may affect Audiologist's preferences for patient-centeredness, and it  
41 is likely that a number of these factors are more similar between Portugal and Australia than  
42 Portugal and India, or Portugal and Iran.  
43  
44  
45  
46  
47  
48  
49  
50  
51  
52  
53  
54  
55  
56  
57  
58  
59  
60

1  
2  
3  
4 When comparing scores across countries the trend for higher PPOS scores provided by  
5  
6 audiologists from Portugal compared to their peers from India and Iran, was true for almost  
7  
8 all questionnaire items when analysed individually. However, some variations exist. For  
9  
10 example, scores for *item 1* (i.e., audiologist is the one who should decide what gets talked  
11  
12 about during an appointment), was similar among audiologists in all three countries. This  
13  
14 might reflect a similarity in service delivery that place restricted time allowances on clinical  
15  
16 session that would encourage the Audiologist to keep conversation ‘on task’. Scores for *item*  
17  
18 *18* (i.e., when clients look up audiological information on their own, this usually confuses  
19  
20 more than it helps) followed the reverse trend with audiologists in India and Iran scoring  
21  
22 higher than audiologists in Portugal, albeit by relatively small differences in score. In this  
23  
24 case, the ability of the patient population to find relevant information may be related to local  
25  
26 factors such as internet access and language-specific information resources. *Item 2* had the  
27  
28 largest difference in score between Portugal and the other two countries (i.e., Although health  
29  
30 care is less personal these days, this is a small price to pay for audiological advances). The  
31  
32 responses could have been influenced by how the respondent views recent audiological  
33  
34 advances. Improvements in technology have occurred at different times in different countries;  
35  
36 it may be that audiologist’s responses are reflecting their opinion on which technological  
37  
38 advancements they feel have helped clients, as much as reflecting their opinion on the  
39  
40 changing personal aspect of healthcare. An example would be if the move from analogue to  
41  
42 digital technology was more recent for India and Iran; this may be valued more highly against  
43  
44 a loss of the personal involvement in healthcare than in Portugal, if this development had  
45  
46 occurred further in the past. Studies from other disciplines have shown that the PPOS scores  
47  
48 indicating preference for patient-centredness can vary among professionals in different  
49  
50 countries. For example, medical practitioners’ mean PPOS scores of 4.8 in the USA<sup>4</sup>,  
51  
52 compared to 3.3 in Greece<sup>22</sup>.  
53  
54  
55  
56  
57  
58  
59  
60

1  
2  
3  
4  
5  
6 The key influencing factors for the differences observed are the local healthcare system,  
7 national culture, organisational-related factors (see Grenness et al.<sup>2</sup>), ethnicity<sup>23</sup> and cross-  
8 cultural aspects<sup>24</sup> as indicated in studies from other areas. We hypothesise that one of the  
9 main contributing factors could be the ‘*culture*’. Geert Hofstede defines culture as ‘*the*  
10 *collective programming of the mind distinguishing the members of one group or category of*  
11 *people from another*<sup>25</sup>. Figure 2 represents Hofstede’s dimensions of national culture in  
12 Portugal, India and Iran, which include: power distance; individualism; masculinity;  
13 uncertainty avoidance; pragmatism; and indulgence<sup>25</sup>. A greater number of similarities are  
14 noticed between India and Iran when compared to Portugal (e.g., individualism, masculinity  
15 and uncertainty avoidance). These observations are consistent with a contribution of culture  
16 to differences and similarities in preferences for patient-centredness noticed among different  
17 countries in this study. It would also be consistent with the previously reported findings of  
18 medical practitioners from the USA, a country with a very high score of Individualism,  
19 compared to Greece, considered to be a collectivist culture. Given this finding, we argue that  
20 there is a need for increased focus on cultural competency for professionals in order to  
21 deliver patient-centred care<sup>26</sup>.

22  
23  
24  
25  
26  
27  
28  
29  
30  
31  
32  
33  
34  
35  
36  
37  
38  
39  
40  
41  
42 **[Figure 2 near here]**  
43  
44  
45

46 It is important to note that the current study focused on self-reported preferences for patient-  
47 centredness and not the actual clinical behaviour. Previous studies have suggested that the  
48 preferences for patient-centredness measured using PPOS correlate well with the actual  
49 clinical behaviour of professionals as measured by verbal exchange between patients and  
50 professionals<sup>9</sup>. However, not much is known about the patients’ preferences for hearing  
51 healthcare services and more importantly for ‘patient-centred healthcare’ within these  
52  
53  
54  
55  
56  
57  
58  
59  
60

1  
2  
3  
4 countries. Further studies with a qualitative design may help explore these aspects. A further  
5  
6 consideration is to what extent the clinician population will reflect the general ‘culture’ that is  
7  
8 assigned to a nation: It is likely that this demographic vary from the general population as  
9  
10 regards educational level in addition to other socioeconomic factors, and the degree of  
11  
12 difference is likely to be specific to the particular profession, and also country being  
13  
14 considered.  
15  
16

17  
18  
19 Other potential influences on audiologists’ preferences for patient centredness are age,  
20  
21 duration of work experience and employment type<sup>13</sup>. In the current study no significant  
22  
23 differences existed between groups in terms of age and duration of work experience. The  
24  
25 distribution of audiologists among different areas of employment was broadly similar  
26  
27 between countries. However, differences were noted in terms of participants’ gender between  
28  
29 countries. The estimates of male/female ratio practicing in Audiology in these countries, as  
30  
31 indicated by the professional bodies, are 1:4, 1:2 and 1:2 in Portugal, India and Iran  
32  
33 respectively. The current study sample had a similar gender pattern of audiologists even  
34  
35 though not exactly matching these ratios. Gender has been found to influence the  
36  
37 practitioners’ preference for patient-centredness with women displaying a greater preference  
38  
39 for patient-centredness than male counterparts<sup>27,28</sup>, although this was not found to be a  
40  
41 significant factor for audiologists’ preferences for patient-centredness in a large scale  
42  
43 Australian study<sup>13</sup>. Hence, further exploration of a gender effect in preference for patient-  
44  
45 centredness is necessary in future studies.  
46  
47  
48  
49  
50

### 51 52 ***Study Implications and Future Directions***

53  
54 Patient-centredness is important in healthcare as it is linked to patient-outcomes such as  
55  
56 increased satisfaction, adherence and health outcomes<sup>29,30</sup> and also to perceived quality of  
57  
58  
59  
60

1  
2  
3  
4 service delivery<sup>18</sup>. Considering that there is evidence that rehabilitative Audiology patients  
5  
6 also prefer patient-centred care<sup>13</sup>, this concept has direct clinical implications in hearing  
7  
8 healthcare.  
9

10  
11  
12 The current study reports some interesting findings about audiologists' preference for patient-  
13 centeredness in different countries. However, it might be more appropriate to study patient-  
14 centredness of professionals in congruence with patients<sup>4</sup>. For example, although the mean  
15 scores in India and Iran were lower than those of Portugal, if the patients in India and Iran  
16 have similar preferences for patient-centredness as the professionals then, the care delivery is  
17 likely to meet patients' expectations. Further, it would be useful and important to understand  
18 how the concept of patient-centredness is understood and valued by both professionals and  
19 patients in different countries. If future studies (focussing on both professionals and patients)  
20 suggest marked differences, similar to those demonstrated here, it may be necessary to  
21 reconceptualise the principle of patient-centredness.  
22  
23  
24  
25  
26  
27  
28  
29  
30  
31  
32  
33  
34  
35  
36

37 Given that patient-centredness has been found to be an important factor in patient satisfaction  
38 and outcomes, at least in some countries, and since it has been suggested that clinicians can  
39 learn to become patient-centred<sup>31</sup>, it may be necessary to include such concepts in training  
40 programmes, particularly in cases where practitioners demonstrate a significantly lower  
41 preference towards patient-centredness than their patients. Moreover, future studies may also  
42 focus on understanding the differences and similarities in preferences towards patient-  
43 centredness among sub-cultures within the same country (e.g., different ethnic groups). Such  
44 studies may further inform the arguments of researchers who have been advocating the need  
45 for cultural competence (the ability of individuals, groups and organisations to effectively  
46 interact with individuals with different cultural backgrounds) in the delivery of healthcare  
47  
48  
49  
50  
51  
52  
53  
54  
55  
56  
57  
58  
59  
60

1  
2  
3  
4 services<sup>32</sup>. Moreover; this may have consequences for the increasingly international  
5  
6 Audiology workforce<sup>16</sup>, both in terms of the migration of audiologists to other countries for  
7  
8 employment and the provision of distance-learning models of Audiology education. Overall,  
9  
10 this information may highlight the need to consider patient-centeredness in order to optimise  
11  
12 hearing healthcare globally.  
13

### 14 15 16 17 ***Strengths and Limitations*** 18

19  
20 A response rate of 76% was obtained for this questionnaire-based study and there was  
21  
22 diversity in the data from audiologists' distributed across three countries. Nevertheless, the  
23  
24 study has some limitations. For example, aspects such as healthcare delivery models and  
25  
26 educational system were not controlled for, but may have contributed to the differences and  
27  
28 similarities noticed in audiologists preferences. However, there was a reasonable spread of  
29  
30 audiologist practicing in public and private Audiology clinics, and audiologists in all three  
31  
32 countries were trained to a minimum standard of a Bachelor's degree. A relatively small  
33  
34 sample size and lack of anonymity in data collection were also limitations of the current  
35  
36 study. We were aware that a sampling bias may have been present, since audiologists with  
37  
38 particular preferences may have been more inclined to respond to the questionnaire. The fact  
39  
40 that identifiable information may have been present in the emailed responses had the  
41  
42 potential to influence/discourage an individual's response. These biases would have been  
43  
44 present for all countries.  
45  
46  
47  
48  
49

### 50 51 **Conclusion** 52

53  
54 The data described here are the first in hearing healthcare to demonstrate specific differences  
55  
56 and similarities in audiologists' preferences for patient-centeredness across three countries.  
57  
58 We observed that the two countries with the most similar cultural profile had the most similar  
59  
60

1  
2  
3  
4 preference level for patient-centred care. There are several factors that might influence  
5  
6 preference for patient-centred care, and further investigation is required in order to determine  
7  
8 the role of the education and healthcare system, organisational-related factors, and ethnicity  
9  
10 in contributing to the differences and similarities noticed. Clinician reported Patient-  
11  
12 centredness and the cultural aspects of the clinician and patient population are different  
13  
14 across countries and this may have implications for the training professionals and  
15  
16 implementation of clinical practice in terms of optimising hearing healthcare across countries.  
17  
18  
19  
20  
21  
22  
23  
24  
25  
26  
27  
28  
29  
30  
31  
32  
33  
34  
35  
36  
37  
38  
39  
40  
41  
42  
43  
44  
45  
46  
47  
48  
49  
50  
51  
52  
53  
54  
55  
56  
57  
58  
59  
60

## Acknowledgements

We gratefully acknowledge Professors Edward Krupat and Louise Hickson for allowing us to use the modified version of the PPOS.

## Contributors

VM - Contributed to most parts of the work including data collection, analysis and writing; PG - Contributed to data analysis, interpretation and write up; DT - Contributed to data collection and write up; TA - Contributed to data collection and write up; KR - Contributed to data collection and write up.

## Funding

No funding was received to conduct this study.

## Ethical Approval

Ethical approval was obtained from the *School of Allied Health Sciences, Polytechnic Institute of Porto* at Porto and *All India Institute of Speech and Hearing* at Mysore for data collection in Portugal and India respectively. This kind of study did not require ethical approval under the *Department of Audiology, University of Social Welfare and Rehabilitation Sciences* at Tehran for data collection in Iran.

## Data Sharing

No additional data are available.



## Conflict of interests

None.

### FIGURE LEGENDS:

**FIGURE 1:** Bar Graphs showing the mean total PPOS Score ('Full Scale'), and the mean PPOS Score for the 'Sharing' and 'Caring' Subscales for Audiologists from Portugal, India and Iran. (\*) indicates a significant difference ( $P < 0.01$ )

**FIGURE 2:** Bar graph showing Hofstede's cultural dimension values for Portugal, India and Iran. A high score power distance expresses that the less powerful members of a society accept and expect that power is distributed unequally. A high score on Individualism vs Collectivism can be defined as a preference for a loosely-knit social framework in which individuals are expected to take care of only themselves and their immediate families. A high score on 'Masculinity vs Femininity' suggests a preference in society for achievement, heroism, assertiveness and material rewards for success as opposed to cooperation, modesty, caring for the weak and quality of life. A high score on 'Uncertainty Avoidance' suggests members of a society feel uncomfortable with uncertainty and ambiguity. A high score on 'Pragmatism suggests the society encourages thrift and efforts in modern education as a way to prepare for the future, as opposed to relying on time-honoured traditions. A high score on 'Indulgence' suggests the society follows gratification of basic and natural human drives related to enjoying life and having fun, as opposed to restrain in such activities based on social norms.

## References

1. Mead N, Bower P. Patient-centredness: A conceptual framework and review of the empirical literature. *Soc Sci Med* 2000;51:1087-1110.
2. Grenness C, Hickson L, Laplante-Lévesque A. et al. Patient-centredness care: A review for rehabilitative audiologists. *Int J Audiol* 2014;53:S60-67.
3. Michie S, Miles J, Weinman J. Patient-centredness in illness: What is it and does it matter? *Patient Educ Couns* 2003;51:197-206.
4. Krupat E, Rosenkranz SL, Yeager CM, et al. The practice orientations of physicians and patients: The effect of doctor-patient congruence on satisfaction. *Patient Educ Couns* 2000;39:49-59.
5. Chan CMH, Azman WA. Attitudes and role orientation of doctor-patient fit and patient satisfaction in cancer care. *Singapore Med J* 2012;53(1):52-56.
6. Hogden A, Greenfield D, Nugus P, et al. Engaging in patient decision-making in multidisciplinary care for amyotrophic lateral sclerosis: The views of health professionals. *Patient Prefer Adher* 2012;6:691-701.
7. Umar N, Schollgen I, Terris DD. It is not always about gains: utilities and disutilities associated with treatment features in patients with moderate-to-severe psoriasis. *Patient Prefer Adher* 2012;6:187-184.
8. Levinson W, Roter D, Mullooly J, et al. Physician-patient communication: The relationship with malpractice claims among primary care physicians and surgeons. *J Am Med Assoc* 1997;277:553-559.
9. Shaw WS, Woiszwillo MJ, Krupat E. Further validation of the Patient-Practitioner Orientation Scale (PPOS) from recorded visits for back pain. *Patient Educ Couns* 2012;89:288-291.

10. Sweetow RW, Davis A, Hickson L. Paradigm shift in audiology education. *Audiology Today* 2010;Sept/Oct:32-35.
11. Hickson L. Defining a paradigm shift. *Sem Hear* 2012;33:3-8.
12. Grenness C, Hickson L, Laplante-Lévesque A, et al. Patient-centred audiological rehabilitation: Perspectives of older adults who own hearing aids. *Int J Audiol* 2014;53:S68-75.
13. Laplante-Lévesque A, Hickson L, Grenness C. An Australian survey of audiologists' preferences for patient-centredness. *Int J Audiol* 2014;53:S76-82.
14. Laplante-Lévesque A, Hickson L, Worrall L. A qualitative study of shared decision making in rehabilitative audiology. *J Acad Rehabil Audiol* 2011;43:27-43
15. Poost-Foroosh L, Jennings MB, Shaw L, et al. Factors in client-clinician interaction that influence hearing aid adoption. *Trends Amplif.* 2011; 15(3):127-39
16. Goulios H, Patuzzi RB. Audiology education and practice from an international perspective. *Int J Audiol* 2008;47:647-664.
17. Zhao F, Manchaiah V, St. Claire L, Danermark B, et al. Exploring the influence of culture on hearing help-seeking and hearing aid uptake: A discussion paper. *Int J Audiol* Submitted.
18. Saha S, Beach MC, Cooper LA. Patient centredness, cultural competency and healthcare quality. *J Natl Med Assoc* 2008;100(11):1275-1285.
19. Krupat E, Putnam SM, Yeager CM. The fit between doctors and patient: Can it be measured? *J Gen Intern Med* 1996;11:134.
20. Beaton DE, Bombardier C, Guillemin F, et al. Guidelines for the process of cross-cultural adaptation of self-report measures. *Spine* 2000;25(24):3186-3191.
21. Goulios H, Patuzzi RB. Audiology education and practice from an international perspective *Int J of Audiol* 2008;47:647-664

- 1  
2  
3  
4 22. Tsimtsiou Z, Benos A, Garyfallos AA, et al. Predictors of physicians' attitudes toward  
5 sharing information with patients and addressing psychosocial needs: A cross-  
6 sectional study in Greece. *Health Commun* 2012;27:257-263.  
7  
8  
9  
10  
11 23. Cooper LA, Roter D, Johnson RL, Ford DE, Steinwachs DM, et al. Patient-centred  
12 communication, ratings of care, and concordance of patient and physician race. *Ann*  
13 *Intern Med* 2003;139:907-915.  
14  
15  
16  
17 24. Al-Bawardy R, Blatt B, Al-Shohaib S, et al. Cross-cultural comparison of the patient-  
18 centredness of the hidden curriculum between a Saudi Arabia and 9 US medical  
19 schools. *Med Educ Online* 2009;14:19. doi: [10.3885/meo.2009.T0000144](https://doi.org/10.3885/meo.2009.T0000144)  
20  
21  
22  
23 25. Hofstede Centre. National Cultural Dimensions. Available from: [http://geert-](http://geert-hofstede.com/dimensions.html)  
24 [hofstede.com/dimensions.html](http://geert-hofstede.com/dimensions.html) (accessed on April 24, 2014).  
25  
26  
27  
28 26. Epner DE, Baile WF. Patient-centred care: the key to cultural competence. *Ann Oncol*  
29 2012;23(S3):33-42.  
30  
31  
32 27. Kaplan RM, Gandek B, Greenfield S, et al. Patient and visit characteristics related to  
33 physicians participatory style: Results from medical outcome study. *Med Care*  
34 1995;33:1176-1183.  
35  
36  
37  
38 28. Roter D, Hall J. *Doctors talking with patients, Patients talking with doctors*.  
39 Westport: Auburn House, 2006.  
40  
41  
42  
43 29. DiMatteo MR, Giordani PJ, Lepper HS, et al. Patient adherence and medical  
44 treatment outcomes: A meta-analysis. *Med Care* 2002;40:794-811.  
45  
46  
47  
48 30. Swenson SL, Buell S, Zettler P, et al. Patient-centered communication: Do patients  
49 really prefer it? *J Gen Intern Med* 2004;19:1069-1080.  
50  
51  
52  
53 31. Lewin S, Skea ZC, Entwistle VA, Zwarenstein M, et al. Interventions for providers to  
54 promote a patient-centred approach in clinical consultations. *Cochrane Database Syst*  
55 *Rev* 2009;1:1-60.  
56  
57  
58  
59  
60

- 1  
2  
3  
4 32. Campinha-Bacote J. The process of cultural competence in the delivery of healthcare  
5 services: A model of care. *J Transcult Nurs* 2002;13(3):181-184.  
6  
7  
8  
9  
10  
11  
12  
13  
14  
15  
16  
17  
18  
19  
20  
21  
22  
23  
24  
25  
26  
27  
28  
29  
30  
31  
32  
33  
34  
35  
36  
37  
38  
39  
40  
41  
42  
43  
44  
45  
46  
47  
48  
49  
50  
51  
52  
53  
54  
55  
56  
57  
58  
59  
60

## Tables

**Table 1: Demographic information**

|                                               | <b>All<br/>participants<br/>(n = 191)</b> | <b>Portugal<br/>(n = 55)</b> | <b>India<br/>(n = 78)</b> | <b>Iran<br/>(n = 58)</b> |
|-----------------------------------------------|-------------------------------------------|------------------------------|---------------------------|--------------------------|
| <b>Age in years (Mean±SD)</b>                 | 30.9±8.4                                  | 31.0±8.4                     | 29.6±8.6                  | 32.5±8.0                 |
| <b>Gender (%)</b>                             |                                           |                              |                           |                          |
| ▪ Male                                        | 37                                        | 20                           | 55                        | 30                       |
| ▪ Female                                      | 63                                        | 80                           | 45                        | 70                       |
| <b>Work set-up (%)</b>                        |                                           |                              |                           |                          |
| ▪ Clinic public                               | 35                                        | 23                           | 39                        | 41                       |
| ▪ Clinic private                              | 50                                        | 51                           | 61                        | 33                       |
| ▪ Clinic both                                 | 12                                        | 15                           | 0                         | 26                       |
| ▪ Education                                   | 1                                         | 2                            | 0                         | 0                        |
| ▪ Not known                                   | 2                                         | 9                            | 0                         | 0                        |
| <b>Education (%)</b>                          |                                           |                              |                           |                          |
| ▪ Bachelors                                   | 47                                        | 72                           | 18                        | 60                       |
| ▪ Masters                                     | 48                                        | 22                           | 74                        | 40                       |
| ▪ Doctorate                                   | 5                                         | 6                            | 8                         | 0                        |
| <b>Work experience in years<br/>(Mean±SD)</b> | 7.2±8.1                                   | 7.8±8.2                      | 6.1±8.8                   | 8.1±6.5                  |

**Table 2: Modified patient practitioner orientation scale (PPOS): Mean scores and standard deviation**

|                                                                                                                          | All participants<br>(n = 191) | Portugal<br>(n = 55) | India<br>(n = 78) | Iran<br>(n = 58) |
|--------------------------------------------------------------------------------------------------------------------------|-------------------------------|----------------------|-------------------|------------------|
| <b>PPOS Items (Mean±SD)</b>                                                                                              |                               |                      |                   |                  |
| 1. The audiologist is the one who should decide what gets talked about during an appointment.                            | 2.4±1.1                       | 2.4±1.2              | 2.3±1.2           | 2.5±1.2          |
| 2. Although health care is less personal these days, this is a small price to pay for audiological advances.             | 3.0±1.4                       | 4.3±1.2              | 2.7±1.2           | 2.1±1.0          |
| 3. The most important part of the standard audiological appointment is the hearing test.                                 | 2.7±1.4                       | 3.4±1.2              | 2.5±1.5           | 2.3±1.1          |
| 4. It is often best for clients if they do not have the full explanation of their audiological condition.                | 4.6±1.3                       | 5.0±1.0              | 4.5±1.5           | 4.2±1.3          |
| 5. Clients should rely on their audiologists' knowledge and not try to find out about their conditions on their own.     | 3.2±1.7                       | 4.2±1.4              | 3.4±1.6           | 2.0±1.3          |
| 6. When audiologists ask a lot of questions about a client's background, they are prying too much into personal matters. | 4.4±1.3                       | 5.0±1.0              | 4.0±1.3           | 4.2±1.4          |
| 7. If audiologists are truly good at diagnosis and treatment, the way they relate to clients is not that important.      | 4.8±1.2                       | 5.5±0.7              | 4.4±1.3           | 4.6±1.2          |
| 8. Many clients continue asking questions even though they are not learning anything new.                                | 3.2±1.2                       | 3.4±1.2              | 3.2±1.2           | 3.0±1.2          |
| 9. Clients should be treated as if they were partners with the audiologist, equal in power and status.*                  | 4.1±1.6                       | 4.7±1.6              | 3.7±1.5           | 4.0±1.5          |
| 10. Clients generally want reassurance rather than information about their audiological condition.                       | 2.8±1.1                       | 3.3±1.0              | 2.7±1.1           | 2.5±1.1          |
| 11. If an audiologist's primary tools are being open and warm, the audiologist will not have a lot of success.           | 4.3±1.4                       | 4.6±1.1              | 3.8±1.4           | 4.6±1.3          |

|                                                                                                                                     |         |         |         |         |
|-------------------------------------------------------------------------------------------------------------------------------------|---------|---------|---------|---------|
| 12. When clients disagree with their audiologist, this is a sign that the audiologist does not have the client's respect and trust. | 3.8±1.2 | 4.6±1.0 | 3.7±1.1 | 3.1±1.2 |
| 13. A management plan cannot succeed if it is in conflict with a client's lifestyle or values.*                                     | 4.7±1.1 | 4.7±1.1 | 4.6±1.0 | 4.7±1.2 |
| 14. Most clients want to get in and out of the audiologist's office as quickly as possible.                                         | 3.5±1.4 | 4.4±1.2 | 3.3±1.2 | 2.9±1.3 |
| 15. The client must always be aware that the audiologist is in charge.                                                              | 2.6±1.3 | 2.7±1.2 | 2.4±1.1 | 2.9±1.5 |
| 16. It is not that important to know a client's culture and background in order to treat the client's audiological condition.       | 4.6±1.3 | 5.3±0.9 | 4.3±1.4 | 4.6±1.2 |
| 17. Humour is a major ingredient in the audiologist's management of the client.*                                                    | 4.1±1.3 | 4.8±1.0 | 3.8±1.3 | 3.8±1.4 |
| 18. When clients look up audiological information on their own, this usually confuses more than it helps.                           | 2.9±1.3 | 2.6±1.0 | 2.8±1.4 | 3.4±1.3 |
| <b>PPOS Scales (Mean±SD)</b>                                                                                                        |         |         |         |         |
| ▪ Full scale                                                                                                                        | 3.6±0.6 | 4.2±0.5 | 3.5±0.6 | 3.4±0.4 |
| ▪ Sharing subscale                                                                                                                  | 3.6±0.7 | 4.2±0.6 | 3.4±0.7 | 3.2±0.5 |
| ▪ Caring subscale                                                                                                                   | 3.7±0.6 | 4.1±0.5 | 3.5±0.5 | 3.6±0.5 |

**Note:** Score of 1 (strongly agree) = most clinician-centred; Score of 6 (strongly disagree) = most patient-centred. Items 9, 13 and 17 (\*) are reversely worded items which were reverse scored.



**Table 3: Differences in audiologists' preferences for patient-centredness between countries**

|                   | Degree of freedom | F-test | P       |
|-------------------|-------------------|--------|---------|
| <b>Sharing</b>    | 2                 | 39.76  | < 0.001 |
| <b>Caring</b>     | 2                 | 24.61  | < 0.001 |
| <b>Full scale</b> | 2                 | 42.49  | < 0.001 |

1  
2  
3  
4 **Audiologists' preferences for patient-centredness: A cross-**  
5  
6  
7 **sectional questionnaire study of cross-cultural differences and**  
8  
9  
10 **similarities among professionals in Portugal, India and Iran**  
11  
12  
13

14 **Vinaya Manchaiah<sup>1,2</sup>, Philip A. Gomersall<sup>1</sup>, David Tomé<sup>3</sup>, Tayebeh Ahmadi<sup>4</sup> &**  
15 **Rajalakshmi Krishna<sup>5</sup>**  
16  
17

- 18  
19  
20 1. Department of Vision and Hearing Sciences, Anglia Ruskin University, Cambridge,  
21 United Kingdom  
22  
23 2. Linnaeus Centre HEAD, Department of Behavioral Sciences and Learning, The  
24 Swedish Institute for Disability Research, Linköping University, Linköping, Sweden  
25  
26 3. Department of Audiology, School of Allied Health Sciences, Polytechnic Institute of  
27 Porto, Vila Nova de Gaia, Portugal  
28  
29 4. Department of Audiology, University of Social Welfare and Rehabilitation Sciences,  
30 Tehran, Iran  
31  
32 5. All India Institute of Speech and Hearing, University of Mysore, Mysore, India  
33  
34  
35  
36  
37  
38  
39  
40  
41

42 **Corresponding Author:** Philip A. Gomersall

43  
44 **Address:** Department of Vision and Hearing Sciences, Coslett 204, Anglia Ruskin  
45 University, Cambridge CB1 1PT, United Kingdom  
46

47 **Email:** [phil.gomersall@anglia.ac.uk](mailto:phil.gomersall@anglia.ac.uk); **Tel:** +44 (0)1223 698653  
48  
49  
50  
51  
52  
53  
54  
55  
56  
57  
58  
59  
60

## Abstract

**Objective:** Patient-centredness has become one of the important aspects of health service delivery, however, a limited number of studies exist that focus on this concept in the domain of hearing healthcare. The objective of this study was to examine and compare audiologists' preferences for patient-centredness in Portugal, India and Iran. **Design:** The study used a cross-sectional survey design with audiologists recruited from three different countries.

**Participants:** A total of 191 fully-completed responses were included in the analysis (55 from Portugal, 78 from India and 58 from Iran). **Main outcome measure:** The Patient-Practitioner Orientation Scale.

**Results:** Patient-Practitioner Orientation Scale mean scores suggest that Audiologists have a preference for patient-centredness (i.e., mean of 3.6 in 5 point scale).

However, marked differences were observed between specific PPOS items suggesting these preferences vary across clinical situations. A significant level of difference ( $p < 0.001$ ) was found between audiologists' preferences for patient-centredness in three countries.

Audiologists in Portugal had a greater preference for patient-centredness when compared to audiologists in India and Iran, although no significant differences were found in terms of age and duration of experience among these sample populations. **Conclusion:** There are differences and similarities in audiologists' preferences for patient-centredness among countries. These findings may have implications for the training of professionals and also for clinical practice in terms of optimising hearing healthcare across countries.

## Key Words

Patient-centeredness, Audiology, hearing healthcare, cross-culture

## Summary

### Article Focus

- To examine and compare audiologists' preferences for patient-centredness in Portugal, India and Iran.

### Key Message

- A significant level of difference was found between audiologists' preferences for patient-centredness in three countries.
- Audiologists in Portugal had a greater preference for patient-centredness when compared to audiologists in India and Iran.
- These findings may have implications for the training of professionals and for clinical practice in terms of optimising hearing healthcare across countries.

### Strengths and Weakness

- A response rate of 76% was obtained for this questionnaire-based study and there was diversity in the data from audiologists distributed across three countries.
- Some variables such as differing healthcare delivery models and educational systems were not controlled for, and may have contributed to the differences and similarities noticed in audiologists preferences.
- A sampling bias may have been present, since audiologists with particular preferences may have been more inclined to respond to the questionnaire.
- The fact that identifiable information may have been present in the emailed responses had the potential to influence/discourage an individual's response.

## Introduction

There has been an increase in advocacy towards patients' involvement in their health and care delivery, hence the concept 'patient-centredness' has received much attention over the past few decades<sup>1</sup>. Patient-centeredness involves aspects such as increased importance placed on patient participation, self-determination of patients in their healthcare (i.e., the rights and abilities of patients to make their own choices and decisions about the medical care and treatment they receive ), and the creation of a power-balanced therapeutic relationship between patients and professionals<sup>2</sup>. Although there has been little consensus over the meaning of this concept universally, patient-centredness has been described in the field of general practice with five main dimensions: (1) biopsychosocial perspective; (2) patient as a person; (3) shared knowledge and power; (4) therapeutic alliance; and (5) clinician as a person<sup>1</sup>. Patient-centeredness has been suggested to be fundamental part of the successful management of chronic health conditions<sup>3</sup>.

Studies from a variety of areas of healthcare (including oncology, skin disorders, amyotrophic lateral sclerosis) have suggested that the health professional's preferences towards patient-centeredness is important in determining outcomes, including patient satisfaction<sup>4-7</sup>. A shortfall in patient-centeredness has also been linked to malpractice claims<sup>8</sup>, and in general a measured preference for patient-centeredness correlates well with clinical practices such as open communication and a positive rapport between patient and clinician<sup>9</sup>.

The profession of Audiology is particularly interesting in this context since, traditionally, there has been a focus on the technological aspects of hearing healthcare<sup>10</sup>. Some researchers believe that the last two decades has seen a paradigm shift; moving from a focus

1  
2  
3  
4 on the technological aspects of hearing healthcare to a more person-centred approach to  
5  
6 rehabilitation<sup>10 11</sup>. The empirical evidence for this shift is limited, with only a small number  
7  
8 of published studies on patient-centeredness specific to audiology: Grenness et al.<sup>12</sup> studied  
9  
10 the views of older adults who own hearing aids in order to further define patient-centred care  
11  
12 in the context of audiological rehabilitation. Interviews were conducted with ten older adults  
13  
14 with hearing aids, exploring their views and the data were analysed using qualitative content  
15  
16 analysis. The results suggested three dimensions: (1) the therapeutic relationship; (2) the  
17  
18 players - patient and audiologist; and (3) the clinical process, and an overarching theme of  
19  
20 individualised care specific to audiological rehabilitation.  
21  
22  
23  
24  
25

26 A recent study focussing specifically on Audiologists in Australia found that they report a  
27  
28 high preference for patient-centredness<sup>13</sup>. Moreover, demographic factors such as age,  
29  
30 duration of work experience and employment type (i.e., public/ private) acted as influencing  
31  
32 factors towards explaining patient-centredness. For example, older audiologists and those  
33  
34 who had practiced longer had a significantly greater preference for patient-centeredness when  
35  
36 compared to younger and less-experienced audiologists. This is the only published study that  
37  
38 has explicitly explored audiologists' preferences towards patient-centredness.  
39  
40  
41

42 Two further studies have been conducted in the field of Audiology that, whilst not explicitly  
43  
44 focusing on patient centeredness as a distinct entity, are highly relevant: Laplante-Lévesque  
45  
46 et al conducted a qualitative study, exploring shared decision making in adults with acquired  
47  
48 hearing impairment, which suggested that patients wanted rehabilitative audiologists to hear  
49  
50 their experiences and preferences and to tailor their interventions accordingly<sup>14</sup>. Poost-  
51  
52 Foroosh et al.<sup>15</sup> studied the factors in the interaction between Audiologists and clients in the  
53  
54 decision to purchase a hearing aid. The study asked twelve clients with acquired hearing loss  
55  
56 and ten audiologists, from both University and private practices, to supply statements  
57  
58  
59  
60

1  
2  
3  
4 regarding which clinician-patient factors they felt influenced the decision to purchase a  
5  
6 hearing aid. Client-centred interaction was identified as one of two major themes in the  
7  
8 responses provided (client-empowerment was the other).  
9

10  
11  
12 In all cases, the research discussed above consistently demonstrates the significant value that  
13  
14 patients place in the relationship with the clinician. Across the studies it can be seen that  
15  
16 different clinician-specific factors were found to influence the degree of patient-centeredness.  
17  
18 As of yet there is little strong evidence for improved rehabilitation outcomes, although  
19  
20 hearing aid purchase was observed to be positively influenced by more client-centred  
21  
22 practice. The reader is referred to a recent literature review by Grenness et al.<sup>2</sup> for further  
23  
24 details on patient-centred care in relation to rehabilitative Audiology.  
25  
26  
27  
28  
29

30  
31 Given the clinician-specific differences observed in the studies discussed above, and the fact  
32  
33 that Audiology practices vary considerably across countries<sup>16</sup>, it would be useful to examine  
34  
35 audiologists' preferences for patient-centeredness across different countries which vary in  
36  
37 terms of culture and healthcare systems. Moreover; it has been highlighted in general that  
38  
39 there are few cross-cultural studies in the area of hearing healthcare, highlighting the need for  
40  
41 such studies<sup>18</sup>  
42  
43  
44  
45

46 Cultural competence is a key aspect that is known to influence healthcare quality<sup>17 18</sup>. We  
47  
48 hypothesise that the present culture to which an individual is exposed, as well as their cultural  
49  
50 background, can influence both patients' and providers' preferences in healthcare and  
51  
52 towards patient-centredness. We were particularly interested in understanding and comparing  
53  
54 the preferences for patient-centeredness among Audiologists in European and Asian  
55  
56 countries. Asian countries, compared to European countries, are considered to be more  
57  
58  
59  
60

1  
2  
3  
4 collectivist societies, with a greater emphasis placed on the role of the individual as part of a  
5  
6 local group and/or community with less of a tendency to focus on ‘looking after oneself’<sup>24</sup>.  
7  
8 Further to this, it has been posited that Asian countries have a tendency towards a high  
9  
10 ‘power distance’ within levels of organisations – this reflects how willing the less powerful  
11  
12 members of an organisation or group are to accept an unequal distribution of power<sup>24</sup>. In the  
13  
14 context of patient-centredness such cultural effects might result in different opinions towards  
15  
16 a hierarchical ‘paternalistic’ approach to audiological management (where the clinician may  
17  
18 display an attitude of superiority over the patient), versus a patient centred-approach.  
19  
20  
21  
22  
23  
24  
25

26 The aim of the current study was to examine and compare audiologists’ preferences for  
27  
28 patient-centredness in Portugal, India and Iran. These countries vary in terms of healthcare  
29  
30 system, culture and socio-economic status. However, they were chosen as they all have a  
31  
32 minimum educational level requirement of a Bachelor’s degree education for Audiologists,  
33  
34 and also due to convenience in data collection.  
35  
36  
37  
38  
39

## 40 **Method**

### 41 *Ethical Considerations*

42  
43 Ethical approval was obtained from the *School of Allied Health Sciences, Polytechnic*  
44  
45 *Institute of Porto* at Porto and *All India Institute of Speech and Hearing* at Mysore for data  
46  
47 collection in Portugal and India respectively. This kind of study did not require ethical  
48  
49 approval under the *Department of Audiology, University of Social Welfare and Rehabilitation*  
50  
51 *Sciences* at Tehran for data collection in Iran.  
52  
53  
54  
55  
56  
57

### 58 *Study Design and Participants*



1  
2  
3  
4 The current study used a cross-sectional survey design and purposive sampling to recruit  
5  
6 participants. The email mailing list was obtained from university and professional  
7  
8 associations which consisted of audiologists distributed throughout each of the three  
9  
10 countries. The Patient-Practitioner Orientation Scale (PPOS) questionnaire, with some  
11  
12 additional demographics questions (i.e., age, gender, number of years of experience, work  
13  
14 set-up, country of origin and country in which currently practicing), was sent to 260  
15  
16 Audiologists (80 in Portugal, 110 in India and 70 in Iran) via email, requesting them to  
17  
18 complete and return back to the researcher by email. Two email reminders were sent for non-  
19  
20 respondents after two and four weeks respectively. As the Email ID might have contained  
21  
22 some information that may have helped identify the individual, the survey was not fully  
23  
24 anonymous. In the interest of keeping the survey short, only limited demographic information  
25  
26 was requested and the choice was made to consider the most important aspects based on the  
27  
28 findings of the previous studies<sup>12-14</sup>, as discussed in the introduction.  
29  
30  
31  
32  
33  
34

### 35 *Questionnaire*

36  
37 The PPOS was developed by Krupat et al.<sup>19</sup> to study physician preferences towards patient-  
38  
39 centredness. However, a modified version of the PPOS that has previously been used to study  
40  
41 audiologists' preferences towards patient-centredness was used in the current study<sup>13</sup>. This  
42  
43 modified version of the PPOS was found to have acceptable internal consistency ( $\alpha = 0.78$ ).  
44  
45 This scale has eighteen questions which are scored on a 6-point Likert scale (1 = strongly  
46  
47 agree; 6 = strongly disagree). The total score ranges from 18 (most audiologist-centred) to  
48  
49 108 (most patient-centred), and there are two sub-scales: The first nine-item sub-scale,  
50  
51 *sharing*, reflects the extent to which the respondent believes that patients desire information  
52  
53 and should be part of the decision making process (e.g., patients should be treated as if they  
54  
55 were partners with the audiologists, equal in power and status). The other nine-item sub-  
56  
57  
58  
59  
60

1  
2  
3  
4 scale, *caring*, reflects the extent to which the respondent sees the patient's expectations,  
5  
6 feelings, and life circumstances as critical elements in the treatment process (e.g., a treatment  
7  
8 plan cannot succeed if it is in conflict with a patient's lifestyle or values).  
9

10  
11  
12 An English version of the questionnaire was administered in India. Portuguese and Farsi  
13 translated versions were used in Portugal and Iran respectively. The questionnaire translation  
14  
15 process was aimed at achieving different language versions of the English instrument that are  
16  
17 conceptually equivalent in each of the target countries/cultures. That is, the focus was on  
18  
19 cross-cultural and conceptual, rather than on linguistic/literal equivalence. We followed the  
20  
21 well accepted forward-translations and back-translations method<sup>20</sup>. This process involved  
22  
23 four main stages: forward translation; expert back translation; review and resolution of any  
24  
25 discrepancies; and pre-testing with five participants each, in both Portugal and Iran.  
26  
27  
28  
29  
30  
31  
32

### 33 **Data Analysis**

34  
35 In the first instance, descriptive statistics (i.e., mean, standard deviation), a test of normality  
36  
37 and a test of homogeneity of variance were performed. Mean total PPOS scores for  
38  
39 audiologists from three countries were compared using an independent one-way analysis of  
40  
41 variance (ANOVA). An alpha level of 0.01 was used to determine significance. Bonferroni  
42  
43 *post-hoc* analysis was performed to further examine the relationship between groups. Further,  
44  
45 a one-way analysis of covariance (ANCOVA) was performed with age and duration of work  
46  
47 experience as covariates in order to exclude the influence of these variables on the observed  
48  
49 differences between the group means.  
50  
51  
52  
53  
54

### 55 **Results**

1  
2  
3  
4 A total of 198 responses (response rate of 76%) were received. This included: 55 responses  
5  
6 from Portugal (response rate of 69%); 82 responses from India (response rate of 75%); and  
7  
8 61 responses from Iran (response rate of 87%). However, three responses from Iran  
9  
10 (incomplete data) and four responses from India (audiologists currently practicing in a  
11  
12 different country) were excluded. A total of 191 responses (i.e., 73%) were included in the  
13  
14 analysis (55 from Portugal, 78 from India and 58 from Iran). Table 1 presents the  
15  
16 demographic information and Table 2 presents PPOS scores. ANOVA showed no difference  
17  
18 between groups in terms of age [ $F(2, 188) = 2.13, p = 0.121$ ] and also duration of work  
19  
20 experience [ $F(2, 188) = 1.16, p = 0.313$ ].  
21  
22

23  
24 [Table 1 near here]

25  
26 [Table 2 near here]

27  
28  
29  
30 Data for both full-scale and subscales were found to be normally distributed (based on  
31  
32 Kolmogorov-Smirnov test and visual examination of histograms). Homogeneity of variances  
33  
34 (based on Levene's test) was found for *caring* and *total mean* ( $p = 0.625$  and  $0.129$   
35  
36 respectively) and not for *sharing* ( $p = 0.020$ ). Since our data were found to be normally  
37  
38 distributed, we elected to use ANOVA for our analysis, despite the fact that homogeneity of  
39  
40 variances could not be assumed for the *sharing* subscale. A robust procedures (Welch and  
41  
42 Brown-Forsythe) test was performed to check ANOVA findings which indicated the same  
43  
44 significant differences between group means ( $p < 0.001$  in all cases).  
45  
46  
47  
48

49  
50 The PPOS mean scores from each population were analysed using a one way between-  
51  
52 subjects ANOVA (see Table 3). A significant result was found for *sharing* subscale [ $F(2,$   
53  
54  $188) = 39.76$ ], *caring* subscale [ $F(2, 188) = 24.61$ ] and the *full* scale [ $F(2, 188) = 42.49$ ].  
55  
56 Further, *post-hoc* tests with Bonferroni correction showed that the difference between  
57  
58  
59  
60

1  
2  
3  
4 Portugal and India and also Portugal and Iran were significant for *sharing* subscale, *caring*  
5 subscale and *full* scale ( $p = 0.001$ ,  $0.001$  and  $0.001$  respectively). However, the difference  
6 between India and Iran were not statistically significant for the *sharing* subscale, *caring*  
7 subscale and *full* scale ( $p = 0.171$ ,  $p = 0.841$  and  $p = 1$  respectively).  
8  
9  
10  
11  
12

13  
14  
15 **[Table 3 near here]**  
16  
17

18  
19 These results show some differences and some similarities in audiologists' preferences  
20 towards patient-centredness from different countries (see Figure 1). Audiologists in Portugal  
21 had significantly greater preference for patient-centredness when compared to audiologists in  
22 India and Iran whose preferences did not differ much.  
23  
24  
25  
26  
27  
28  
29

30 **[Figure 1 near here]**  
31  
32  
33  
34

35 Whilst our sample populations were well matched, with no significant differences with  
36 respect to age and experience, this does not exclude some possible influence of these  
37 variables on the data. Therefore we elected to include these variables as covariates, and assess  
38 if this had an influence on the main effect observed: The data met the necessary assumptions  
39 (i.e., linearity, homoscedasticity and homogeneity of regression slopes) and the ANCOVA  
40 results with age and duration of work experience as covariates and PPOS scores as dependent  
41 variable gave results consistent with the ANOVA, with a significant main effect for the full  
42 scale and subscales only and no significant interaction was observed. Thus we conclude that  
43 differences exist between the responses from audiologists from these countries in preference  
44 for patient-centredness, even after accounting for age and duration of work experience.  
45  
46  
47  
48  
49  
50  
51  
52  
53  
54  
55  
56  
57  
58  
59  
60

## Discussion

This study examined and compared audiologists' preferences for patient-centredness in Portugal, India and Iran. The PPOS scores indicate the self-reported preference for patient-centeredness. An overall mean score per item of greater than 3 for all three countries included suggests that there is a tendency for Audiologists to favour patient-centredness, rather than a clinician-centred approach. This is true for both *caring* and *sharing* subscales. These values can be compared to those observed across other medical specialities<sup>5</sup>. For example, general practitioners and oncology physicians had higher PPOS mean scores (i.e., 4.3 and 5.0 respectively) when compared with physicians with a surgical background (i.e., 2.9). Thus, in general it appears that patient-centred practices vary depending upon the specific duties of the professional. We hypothesise that this could be linked to differences in training routes for medical subspecialties, in combination with the expectation of the role fulfilled by the clinician within their speciality. This is of relevance to Audiology, since training routes vary between countries, with education provision that may follow either a medical, scientific, technician, para-medical model (or a combination thereof)<sup>21</sup>.

From examination of the responses to each item it can be seen that audiologists' preferences for patient-centredness vary depending upon the situation described (see Table 2). For example *item 1* (i.e., audiologist is the one who should decide what gets talked about during an appointment), *item 2* (i.e., most important part of the standard audiological appointment is the hearing test), *item 10* (i.e., clients generally want reassurance rather than information about their audiological condition), and *item 15* (i.e., client must always be aware that the audiologist is in charge) show markedly lower mean scores (2.4-2.8) than the mean PPOS scores (4.6-4.8) in *item 4* (i.e., it is often best for clients if they do not have the full explanation of their audiological condition), *item 7* (i.e., if audiologists are truly good at

1  
2  
3  
4 diagnosis and treatment, the way they relate to clients is not that important) and *item 13* (i.e.,  
5  
6 a management plan cannot succeed if it is in conflict with a client's lifestyle or values). The  
7  
8 content of the items showing a lower mean score are consistent with traditional audiological  
9  
10 practices focusing on application of diagnostic testing, diagnosis and *treatment*, whereas the  
11  
12 other items with higher mean scores are more explicit on their focus towards rehabilitation  
13  
14 (using terms such as 'management plans', and words such as 'relate'). Similar patterns of  
15  
16 PPOS results have been reported in a recent Australian study<sup>13</sup>. Thus it appears that an  
17  
18 audiologist's views towards patient-centeredness vary depending whether they are  
19  
20 considering their diagnostic or rehabilitative roles, and this is shared across countries. Some  
21  
22 researchers suggest that there is a growing trend towards a greater role of client-centred  
23  
24 rehabilitation by audiologists<sup>10, 11</sup>. Therefore; it may be useful to monitor Audiologists'  
25  
26 preferences for patient-centeredness over time.  
27  
28  
29  
30  
31  
32

33 The study results suggest some country-specific differences and some similarities in the  
34  
35 overall preference for patient-centeredness among audiologists from Portugal ( $M = 4.2$ ;  $SD =$   
36  
37  $0.5$ ), India ( $M = 3.5$ ;  $SD = 0.6$ ) and Iran ( $M = 3.4$ ;  $SD = 0.4$ ). Generally, audiologists' in  
38  
39 Portugal had a high preference for patient-centredness, when compared to audiologists in  
40  
41 India and Iran. Moreover, a recent study found that Australian audiologists<sup>14</sup> have high  
42  
43 preference for patient-centredness ( $M = 4.46$ ;  $SD = 0.52$ ), which is similar to Portugal  
44  
45 audiologists' preferences reported in the current study. As discussed later, there are a number  
46  
47 of possible factors that may affect Audiologist's preferences for patient-centeredness, and it  
48  
49 is likely that a number of these factors are more similar between Portugal and Australia than  
50  
51 Portugal and India, or Portugal and Iran.  
52  
53  
54  
55  
56  
57  
58  
59  
60

1  
2  
3  
4 When comparing scores across countries the trend for higher PPOS scores provided by  
5  
6 audiologists from Portugal compared to their peers from India and Iran, was true for almost  
7  
8 all questionnaire items when analysed individually. However, some variations exist. For  
9  
10 example, scores for *item 1* (i.e., audiologist is the one who should decide what gets talked  
11  
12 about during an appointment), was similar among audiologists in all three countries. This  
13  
14 might reflect a similarity in service delivery that place restricted time allowances on clinical  
15  
16 session that would encourage the Audiologist to keep conversation ‘on task’. Scores for *item*  
17  
18 *18* (i.e., when clients look up audiological information on their own, this usually confuses  
19  
20 more than it helps) followed the reverse trend with audiologists in India and Iran scoring  
21  
22 higher than audiologists in Portugal, albeit by relatively small differences in score. In this  
23  
24 case, the ability of the patient population to find relevant information may be related to local  
25  
26 factors such as internet access and language-specific information resources. *Item 2* had the  
27  
28 largest difference in score between Portugal and the other two countries (i.e., Although health  
29  
30 care is less personal these days, this is a small price to pay for audiological advances). The  
31  
32 responses could have been influenced by how the respondent views recent audiological  
33  
34 advances. Improvements in technology have occurred at different times in different countries;  
35  
36 it may be that audiologist’s responses are reflecting their opinion on which technological  
37  
38 advancements they feel have helped clients, as much as reflecting their opinion on the  
39  
40 changing personal aspect of healthcare. An example would be if the move from analogue to  
41  
42 digital technology was more recent for India and Iran; this may be valued more highly against  
43  
44 a loss of the personal involvement in healthcare than in Portugal, if this development had  
45  
46 occurred further in the past. Studies from other disciplines have shown that the PPOS scores  
47  
48 indicating preference for patient-centredness can vary among professionals in different  
49  
50 countries. For example, medical practitioners’ mean PPOS scores of 4.8 in the USA<sup>4</sup>,  
51  
52 compared to 3.3 in Greece<sup>22</sup>.  
53  
54  
55  
56  
57  
58  
59  
60

1  
2  
3  
4  
5  
6 The key influencing factors for the differences observed are the local healthcare system,  
7 national culture, organisational-related factors (see Grenness et al.<sup>2</sup>), ethnicity<sup>23</sup> and cross-  
8 cultural aspects<sup>24</sup> as indicated in studies from other areas. We hypothesise that one of the  
9 main contributing factors could be the ‘*culture*’. Geert Hofstede defines culture as ‘*the*  
10 *collective programming of the mind distinguishing the members of one group or category of*  
11 *people from another*<sup>25</sup>. Figure 2 represents Hofstede’s dimensions of national culture in  
12 Portugal, India and Iran, which include: power distance; individualism; masculinity;  
13 uncertainty avoidance; pragmatism; and indulgence<sup>25</sup>. A greater number of similarities are  
14 noticed between India and Iran when compared to Portugal (e.g., individualism, masculinity  
15 and uncertainty avoidance). These observations are consistent with a contribution of culture  
16 to differences and similarities in preferences for patient-centredness noticed among different  
17 countries in this study. It would also be consistent with the previously reported findings of  
18 medical practitioners from the USA, a country with a very high score of Individualism,  
19 compared to Greece, considered to be a collectivist culture. Given this finding, we argue that  
20 there is a need for increased focus on cultural competency for professionals in order to  
21 deliver patient-centred care<sup>26</sup>.

22  
23  
24  
25  
26  
27  
28  
29  
30  
31  
32  
33  
34  
35  
36  
37  
38  
39  
40  
41  
42 **[Figure 2 near here]**  
43  
44  
45

46 It is important to note that the current study focused on self-reported preferences for patient-  
47 centredness and not the actual clinical behaviour. Previous studies have suggested that the  
48 preferences for patient-centredness measured using PPOS correlate well with the actual  
49 clinical behaviour of professionals as measured by verbal exchange between patients and  
50 professionals<sup>9</sup>. However, not much is known about the patients’ preferences for hearing  
51 healthcare services and more importantly for ‘patient-centred healthcare’ within these  
52  
53  
54  
55  
56  
57  
58  
59  
60



1  
2  
3  
4 countries. Further studies with a qualitative design may help explore these aspects. A further  
5  
6 consideration is to what extent the clinician population will reflect the general ‘culture’ that is  
7  
8 assigned to a nation: It is likely that this demographic vary from the general population as  
9  
10 regards educational level in addition to other socioeconomic factors, and the degree of  
11  
12 difference is likely to be specific to the particular profession, and also country being  
13  
14 considered.  
15  
16  
17  
18  
19

20 Other potential influences on audiologists’ preferences for patient centredness are age,  
21  
22 duration of work experience and employment type<sup>13</sup>. In the current study no significant  
23  
24 differences existed between groups in terms of age and duration of work experience. The  
25  
26 distribution of audiologists among different areas of employment was broadly similar  
27  
28 between countries. However, differences were noted in terms of participants’ gender between  
29  
30 countries. The estimates of male/female ratio practicing in Audiology in these countries, as  
31  
32 indicated by the professional bodies, are 1:4, 1:2 and 1:2 in Portugal, India and Iran  
33  
34 respectively. The current study sample had a similar gender pattern of audiologists even  
35  
36 though not exactly matching these ratios. Gender has been found to influence the  
37  
38 practitioners’ preference for patient-centredness with women displaying a greater preference  
39  
40 for patient-centredness than male counterparts<sup>27 28</sup>, although this was not found to be a  
41  
42 significant factor for audiologists’ preferences for patient-centredness in a large scale  
43  
44 Australian study<sup>13</sup>. Hence, further exploration of a gender effect in preference for patient-  
45  
46 centredness is necessary in future studies.  
47  
48  
49  
50  
51  
52

### 53 ***Study Implications and Future Directions***

54  
55 Patient-centredness is important in healthcare as it is linked to patient-outcomes such as  
56  
57 increased satisfaction, adherence and health outcomes<sup>29 30</sup> and also to perceived quality of  
58  
59  
60

1  
2  
3  
4 service delivery<sup>18</sup>. Considering that there is evidence that rehabilitative Audiology patients  
5  
6 also prefer patient-centred care<sup>13</sup>, this concept has direct clinical implications in hearing  
7  
8 healthcare.  
9

10  
11  
12 The current study reports some interesting findings about audiologists' preference for patient-  
13 centeredness in different countries. However, it might be more appropriate to study patient-  
14 centredness of professionals in congruence with patients<sup>4</sup>. For example, although the mean  
15 scores in India and Iran were lower than those of Portugal, if the patients in India and Iran  
16 have similar preferences for patient-centredness as the professionals then, the care delivery is  
17 likely to meet patients' expectations. Further, it would be useful and important to understand  
18 how the concept of patient-centredness is understood and valued by both professionals and  
19 patients in different countries. If future studies (focussing on both professionals and patients)  
20 suggest marked differences, similar to those demonstrated here, it may be necessary to  
21 reconceptualise the principle of patient-centredness.  
22  
23  
24  
25  
26  
27  
28  
29  
30  
31  
32  
33  
34  
35  
36

37 Given that patient-centredness has been found to be an important factor in patient satisfaction  
38 and outcomes, at least in some countries, and since it has been suggested that clinicians can  
39 learn to become patient-centred<sup>31</sup>, it may be necessary to include such concepts in training  
40 programmes, particularly in cases where practitioners demonstrate a significantly lower  
41 preference towards patient-centredness than their patients. Moreover, future studies may also  
42 focus on understanding the differences and similarities in preferences towards patient-  
43 centredness among sub-cultures within the same country (e.g., different ethnic groups). Such  
44 studies may further inform the arguments of researchers who have been advocating the need  
45 for cultural competence (the ability of individuals, groups and organisations to effectively  
46 interact with individuals with different cultural backgrounds) in the delivery of healthcare  
47  
48  
49  
50  
51  
52  
53  
54  
55  
56  
57  
58  
59  
60

1  
2  
3  
4 services<sup>32</sup>. Moreover; this may have consequences for the increasingly international  
5  
6 Audiology workforce<sup>16</sup>, both in terms of the migration of audiologists to other countries for  
7  
8 **employment** and the provision of distance-learning models of Audiology education. **Overall,**  
9  
10 **this information may highlight the need to consider patient-centeredness in order to optimise**  
11  
12 **hearing healthcare globally.**

### 13 14 15 16 17 ***Strengths and Limitations***

18  
19 A response rate of 76% was obtained for this questionnaire-based study and there was  
20  
21 diversity in the data from audiologists' distributed across three countries. Nevertheless, the  
22  
23 study has some limitations. For example, aspects such as healthcare delivery models and  
24  
25 educational system were not controlled for, but may have contributed to the differences and  
26  
27 similarities noticed in audiologists preferences. However, there was a reasonable spread of  
28  
29 audiologist practicing in public and private Audiology clinics, and audiologists in all three  
30  
31 countries were trained to a minimum standard of a Bachelor's degree. A relatively small  
32  
33 sample size and lack of anonymity in data collection were also limitations of the current  
34  
35 study. We were aware that a sampling bias may have been present, since audiologists with  
36  
37 particular preferences may have been more inclined to respond to the questionnaire. The fact  
38  
39 that identifiable information may have been present in the emailed responses had the  
40  
41 potential to influence/discourage an individual's response. These biases would have been  
42  
43 present for all countries.  
44  
45  
46  
47  
48  
49

### 50 51 **Conclusion**

52  
53 The data described here are the first in hearing healthcare to demonstrate specific differences  
54  
55 and similarities in audiologists' preferences for patient-centeredness across three countries.  
56  
57 We observed that the two countries with the most similar cultural profile had the most similar  
58  
59  
60

1  
2  
3  
4 preference level for patient-centred care. There are several factors that might influence  
5  
6 preference for patient-centred care, and further investigation is required in order to determine  
7  
8 the role of the education and healthcare system, organisational-related factors, and ethnicity  
9  
10 in contributing to the differences and similarities noticed. Clinician reported Patient-  
11  
12 centredness and the cultural aspects of the clinician and patient population are different  
13  
14 across countries and this may have implications for the training professionals and  
15  
16 implementation of clinical practice in terms of optimising hearing healthcare across countries.  
17  
18  
19  
20

## 21 **Acknowledgements**

22  
23  
24 We gratefully acknowledge Professors Edward Krupat and Louise Hickson for allowing us to  
25  
26 use the modified version of the PPOS.  
27  
28  
29  
30

## 31 **Contributors**

32  
33 VM - Contributed to most parts of the work including data collection, analysis and writing;  
34  
35 PG - Contributed to data analysis, interpretation and write up; DT - Contributed to data  
36  
37 collection and write up; TA - Contributed to data collection and write up; KR - Contributed to  
38  
39 data collection and write up.  
40  
41  
42  
43  
44

## 45 **Funding**

46  
47 No funding was received to conduct this study.  
48  
49  
50  
51

## 52 **Ethical Approval**

53  
54 Ethical approval was obtained from the *School of Allied Health Sciences, Polytechnic*  
55  
56 *Institute of Porto* at Porto and *All India Institute of Speech and Hearing* at Mysore for data  
57  
58  
59  
60

1  
2  
3  
4 collection in Portugal and India respectively. This kind of study did not require ethical  
5  
6 approval under the *Department of Audiology, University of Social Welfare and Rehabilitation*  
7  
8 *Sciences* at Tehran for data collection in Iran.  
9

### 10 11 12 13 **Data Sharing**

14  
15 No additional data are available.  
16  
17

### 18 19 20 **Conflict of interests**

21  
22 None.  
23  
24  
25  
26

### 27 **References**

- 28  
29  
30 1. Mead N, Bower P. Patient-centredness: A conceptual framework and review of the  
31 empirical literature. *Soc Sci Med* 2000;51:1087-1110.  
32  
33 2. Grenness C, Hickson L, Laplante-Lévesque A, Davidson B. Patient-centredness care:  
34 A review for rehabilitative audiologists. *Int J Audiol* 2014;53:S60-67.  
35  
36 3. Michie S, Miles J, Weinman J. Patient-centredness in illness: What is it and does it  
37 matter? *Patient Educ Couns* 2003;51:197-206.  
38  
39 4. Krupat E, Rosenkranz SL, Yeager CM, Barnard K, Putnam SM, Inui TS. The practice  
40 orientations of physicians and patients: The effect of doctor-patient congruence on  
41 satisfaction. *Patient Educ Couns* 2000;39:49-59.  
42  
43 5. Chan CMH, Azman WA. Attitudes and role orientation of doctor-patient fit and  
44 patient satisfaction in cancer care. *Singapore Med J* 2012;53(1):52-56.  
45  
46  
47  
48  
49  
50  
51  
52  
53  
54  
55  
56  
57  
58  
59  
60

- 1  
2  
3  
4 6. Hogden A, Greenfield D, Nugus P, Kiernan MC. Engaging in patient decision-making  
5  
6 in multidisciplinary care for amyotrophic lateral sclerosis: The views of health  
7  
8 professionals. *Patient Prefer Adher* 2012;6:691-701.  
9
- 10  
11 7. Umar N, Schollgen I, Terris DD. It is not always about gains: utilities and disutilities  
12  
13 associated with treatment features in patients with moderate-to-severe psoriasis.  
14  
15 *Patient Prefer Adher* 2012;6:187-184.  
16
- 17  
18 8. Levinson W, Roter D, Mullooly J, Frankel R. Physician-patient communication: The  
19  
20 relationship with malpractice claims among primary care physicians and surgeons. *J*  
21  
22 *Am Med Assoc* 1997;277:553-559.  
23
- 24  
25 9. Shaw WS, Woiszwillo MJ, Krupat E. Further validation of the Patient-Practitioner  
26  
27 Orientation Scale (PPOS) from recorded visits for back pain. *Patient Educ Couns*  
28  
29 2012;89:288-291.  
30
- 31  
32 10. Sweetow RW, Davis A, Hickson L. Paradigm shift in audiology education. *Audiology*  
33  
34 *Today* 2010;Sept/Oct:32-35.  
35
- 36  
37 11. Hickson L. Defining a paradigm shift. *Sem Hear* 2012;33:3-8.  
38
- 39  
40 12. Grenness C, Hickson L, Laplante-Lévesque A, Davidson B. Patient-centred  
41  
42 audiological rehabilitation: Perspectives of older adults who own hearing aids. *Int J*  
43  
44 *Audiol* 2014;53:S68-75.  
45
- 46  
47 13. Laplante-Lévesque A, Hickson L, Grenness C. An Australian survey of audiologists'  
48  
49 preferences for patient-centredness. *Int J Audiol* 2014;53:S76-82.  
50
- 51  
52 14. Laplante-Lévesque A, Hickson L, Worrall L. A qualitative study of shared decision  
53  
54 making in rehabilitative audiology. *J Acad Rehabil Audiol* 2011;43:27-43  
55
- 56  
57 15. Poost-Foroosh L, Jennings MB, Shaw L, Meston CN, Cheeseman MF. Factors in  
58  
59 client-clinician interaction that influence hearing aid adoption. *Trends Amplif.* 2011;  
60  
15(3):127-39

- 1  
2  
3  
4 16. Goulios H, Patuzzi RB. Audiology education and practice from an international  
5 perspective. *Int J Audiol* 2008;47:647-664.  
6  
7  
8  
9 17. Zhao F, Manchaiah V, St. Claire L, Danermark B, Jones L, Rajalakshmi K, Goodwin  
10 R. Exploring the influence of culture on hearing help-seeking and hearing aid uptake:  
11 A discussion paper. *Int J Audiol* Submitted.  
12  
13  
14 18. Saha S, Beach MC, Cooper LA. Patient centredness, cultural competency and  
15 healthcare quality. *J Natl Med Assoc* 2008;100(11):1275-1285.  
16  
17  
18 19. Krupat E, Putnam SM, Yeager CM. The fit between doctors and patient: Can it be  
19 measured? *J Gen Intern Med* 1996;11:134.  
20  
21  
22 20. Beaton DE, Bombardier C, Guillemin F, Ferraz MB. Guidelines for the process of  
23 cross-cultural adaptation of self-report measures. *Spine* 2000;25(24):3186-3191.  
24  
25  
26 21. Goulios H, Patuzzi RB. Audiology education and practice from an  
27 international perspective *Int J of Audiol* 2008;47:647-664  
28  
29  
30  
31  
32 22. Tsimtsiou Z, Benos A, Garyfallos AA, Hatzichristou D. Predictors of physicians'  
33 attitudes toward sharing information with patients and addressing psychosocial needs:  
34 A cross-sectional study in Greece. *Health Commun* 2012;27:257-263.  
35  
36  
37 23. Cooper LA, Roter D, Johnson RL, Ford DE, Steinwachs DM, et al. Patient-centred  
38 communication, ratings of care, and concordance of patient and physician race. *Ann*  
39 *Intern Med* 2003;139:907-915.  
40  
41  
42 24. Al-Bawardy R, Blatt B, Al-Shohaib S, Simmens SJ. Cross-cultural comparison of the  
43 patient-centredness of the hidden curriculum between a Saudi Arabia and 9 US  
44 medical schools. *Med Educ Online* 2009;14:19. doi: [10.3885/meo.2009.T0000144](https://doi.org/10.3885/meo.2009.T0000144)  
45  
46  
47 25. Hofstede Centre. National Cultural Dimensions. Available from: [http://geert-](http://geert-hofstede.com/dimensions.html)  
48 [hofstede.com/dimensions.html](http://geert-hofstede.com/dimensions.html) (accessed on April 24, 2014).  
49  
50  
51  
52  
53  
54  
55  
56  
57  
58  
59  
60

- 1  
2  
3  
4 26. Epner DE, Baile WF. Patient-centred care: the key to cultural competence. *Ann Oncol*  
5  
6 2012;23(S3):33-42.  
7  
8  
9 27. Kaplan RM, Gandek B, Greenfield S, Rogers W, Ware J. Patient and visit  
10 characteristics related to physicians participatory style: Results from medical outcome  
11 study. *Med Care* 1995;33:1176-1183.  
12  
13  
14 28. Roter D, Hall J. *Doctors talking with patients, Patients talking with doctors*.  
15 Westport: Auburn House, 2006.  
16  
17  
18 29. DiMatteo MR, Giordani PJ, Lepper HS, Croghan TW. Patient adherence and medical  
19 treatment outcomes: A meta-analysis. *Med Care* 2002;40:794-811.  
20  
21  
22  
23 30. Swenson SL, Buell S, Zettler P, White M, Ruston DC. et al. Patient-centered  
24 communication: Do patients really prefer it? *J Gen Intern Med* 2004;19:1069-1080.  
25  
26  
27  
28 31. Lewin S, Skea ZC, Entwistle VA, Zwarenstein M, Dick J. Interventions for providers  
29 to promote a patient-centred approach in clinical consultations. *Cochrane Database*  
30  
31  
32  
33  
34  
35 32. Campinha-Bacote J. The process of cultural competence in the delivery of healthcare  
36 services: A model of care. *J Transcult Nurs* 2002;13(3):181-184.  
37  
38  
39  
40  
41  
42  
43  
44  
45  
46  
47  
48  
49  
50  
51  
52  
53  
54  
55  
56  
57  
58  
59  
60



## Tables

**Table 1: Demographic information**

|                                               | <b>All<br/>participants<br/>(n = 191)</b> | <b>Portugal<br/>(n = 55)</b> | <b>India<br/>(n = 78)</b> | <b>Iran<br/>(n = 58)</b> |
|-----------------------------------------------|-------------------------------------------|------------------------------|---------------------------|--------------------------|
| <b>Age in years (Mean±SD)</b>                 | 30.9±8.4                                  | 31.0±8.4                     | 29.6±8.6                  | 32.5±8.0                 |
| <b>Gender (%)</b>                             |                                           |                              |                           |                          |
| ▪ Male                                        | 37                                        | 20                           | 55                        | 30                       |
| ▪ Female                                      | 63                                        | 80                           | 45                        | 70                       |
| <b>Work set-up (%)</b>                        |                                           |                              |                           |                          |
| ▪ Clinic public                               | 35                                        | 23                           | 39                        | 41                       |
| ▪ Clinic private                              | 50                                        | 51                           | 61                        | 33                       |
| ▪ Clinic both                                 | 12                                        | 15                           | 0                         | 26                       |
| ▪ Education                                   | 1                                         | 2                            | 0                         | 0                        |
| ▪ Not known                                   | 2                                         | 9                            | 0                         | 0                        |
| <b>Education (%)</b>                          |                                           |                              |                           |                          |
| ▪ Bachelors                                   | 47                                        | 72                           | 18                        | 60                       |
| ▪ Masters                                     | 48                                        | 22                           | 74                        | 40                       |
| ▪ Doctorate                                   | 5                                         | 6                            | 8                         | 0                        |
| <b>Work experience in years<br/>(Mean±SD)</b> | 7.2±8.1                                   | 7.8±8.2                      | 6.1±8.8                   | 8.1±6.5                  |

**Table 2: Modified patient practitioner orientation scale (PPOS): Mean scores and standard deviation**

|                                                                                                                          | All participants<br>(n = 191) | Portugal<br>(n = 55) | India<br>(n = 78) | Iran<br>(n = 58) |
|--------------------------------------------------------------------------------------------------------------------------|-------------------------------|----------------------|-------------------|------------------|
| <b>PPOS Items (Mean±SD)</b>                                                                                              |                               |                      |                   |                  |
| 1. The audiologist is the one who should decide what gets talked about during an appointment.                            | 2.4±1.1                       | 2.4±1.2              | 2.3±1.2           | 2.5±1.2          |
| 2. Although health care is less personal these days, this is a small price to pay for audiological advances.             | 3.0±1.4                       | 4.3±1.2              | 2.7±1.2           | 2.1±1.0          |
| 3. The most important part of the standard audiological appointment is the hearing test.                                 | 2.7±1.4                       | 3.4±1.2              | 2.5±1.5           | 2.3±1.1          |
| 4. It is often best for clients if they do not have the full explanation of their audiological condition.                | 4.6±1.3                       | 5.0±1.0              | 4.5±1.5           | 4.2±1.3          |
| 5. Clients should rely on their audiologists' knowledge and not try to find out about their conditions on their own.     | 3.2±1.7                       | 4.2±1.4              | 3.4±1.6           | 2.0±1.3          |
| 6. When audiologists ask a lot of questions about a client's background, they are prying too much into personal matters. | 4.4±1.3                       | 5.0±1.0              | 4.0±1.3           | 4.2±1.4          |
| 7. If audiologists are truly good at diagnosis and treatment, the way they relate to clients is not that important.      | 4.8±1.2                       | 5.5±0.7              | 4.4±1.3           | 4.6±1.2          |
| 8. Many clients continue asking questions even though they are not learning anything new.                                | 3.2±1.2                       | 3.4±1.2              | 3.2±1.2           | 3.0±1.2          |
| 9. Clients should be treated as if they were partners with the audiologist, equal in power and status.*                  | 4.1±1.6                       | 4.7±1.6              | 3.7±1.5           | 4.0±1.5          |
| 10. Clients generally want reassurance rather than information about their audiological condition.                       | 2.8±1.1                       | 3.3±1.0              | 2.7±1.1           | 2.5±1.1          |
| 11. If an audiologist's primary tools are being open and warm, the audiologist will not have a lot of success.           | 4.3±1.4                       | 4.6±1.1              | 3.8±1.4           | 4.6±1.3          |

|                                                                                                                                     |         |         |         |         |
|-------------------------------------------------------------------------------------------------------------------------------------|---------|---------|---------|---------|
| 12. When clients disagree with their audiologist, this is a sign that the audiologist does not have the client's respect and trust. | 3.8±1.2 | 4.6±1.0 | 3.7±1.1 | 3.1±1.2 |
| 13. A management plan cannot succeed if it is in conflict with a client's lifestyle or values.*                                     | 4.7±1.1 | 4.7±1.1 | 4.6±1.0 | 4.7±1.2 |
| 14. Most clients want to get in and out of the audiologist's office as quickly as possible.                                         | 3.5±1.4 | 4.4±1.2 | 3.3±1.2 | 2.9±1.3 |
| 15. The client must always be aware that the audiologist is in charge.                                                              | 2.6±1.3 | 2.7±1.2 | 2.4±1.1 | 2.9±1.5 |
| 16. It is not that important to know a client's culture and background in order to treat the client's audiological condition.       | 4.6±1.3 | 5.3±0.9 | 4.3±1.4 | 4.6±1.2 |
| 17. Humour is a major ingredient in the audiologist's management of the client.*                                                    | 4.1±1.3 | 4.8±1.0 | 3.8±1.3 | 3.8±1.4 |
| 18. When clients look up audiological information on their own, this usually confuses more than it helps.                           | 2.9±1.3 | 2.6±1.0 | 2.8±1.4 | 3.4±1.3 |
| <b>PPOS Scales (Mean±SD)</b>                                                                                                        |         |         |         |         |
| ▪ Full scale                                                                                                                        | 3.6±0.6 | 4.2±0.5 | 3.5±0.6 | 3.4±0.4 |
| ▪ Sharing subscale                                                                                                                  | 3.6±0.7 | 4.2±0.6 | 3.4±0.7 | 3.2±0.5 |
| ▪ Caring subscale                                                                                                                   | 3.7±0.6 | 4.1±0.5 | 3.5±0.5 | 3.6±0.5 |

**Note:** Score of 1 (strongly agree) = most clinician-centred; Score of 6 (strongly disagree) = most patient-centred. Items 9, 13 and 17 (\*) are reversely worded items which were reverse scored.

**Table 3: Differences in audiologists' preferences for patient-centredness between countries**

|            | Degree of freedom | F-test | P       |
|------------|-------------------|--------|---------|
| Sharing    | 2                 | 39.76  | < 0.001 |
| Caring     | 2                 | 24.61  | < 0.001 |
| Full scale | 2                 | 42.49  | < 0.001 |

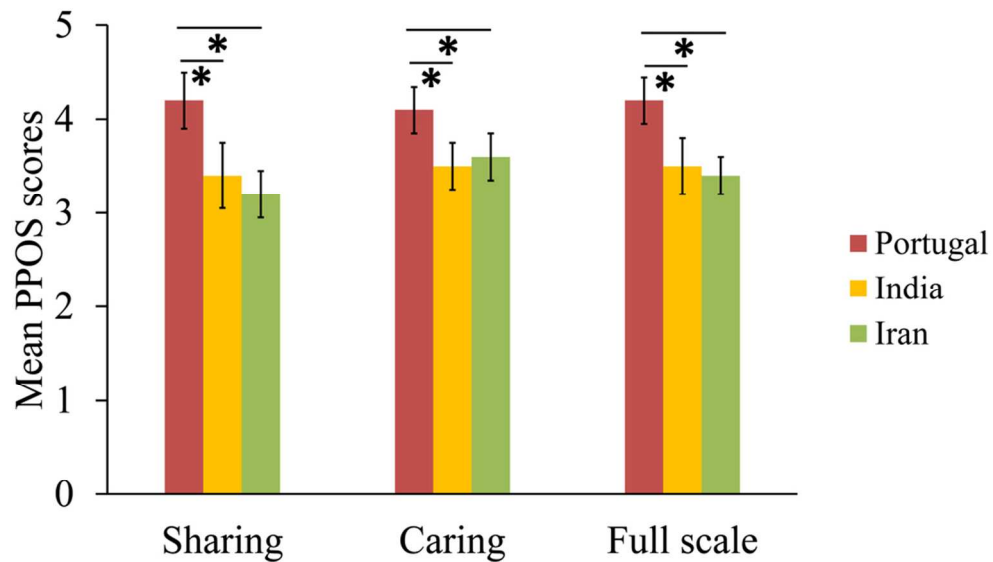

Bar Graphs showing the mean total PPOS Score ('Full Scale'), and the mean PPOS Score for the 'Sharing' and 'Caring' Subscales for Audiologists from Portugal, India and Iran. (\*) indicates a significant difference (P<0.01)

92x52mm (300 x 300 DPI)

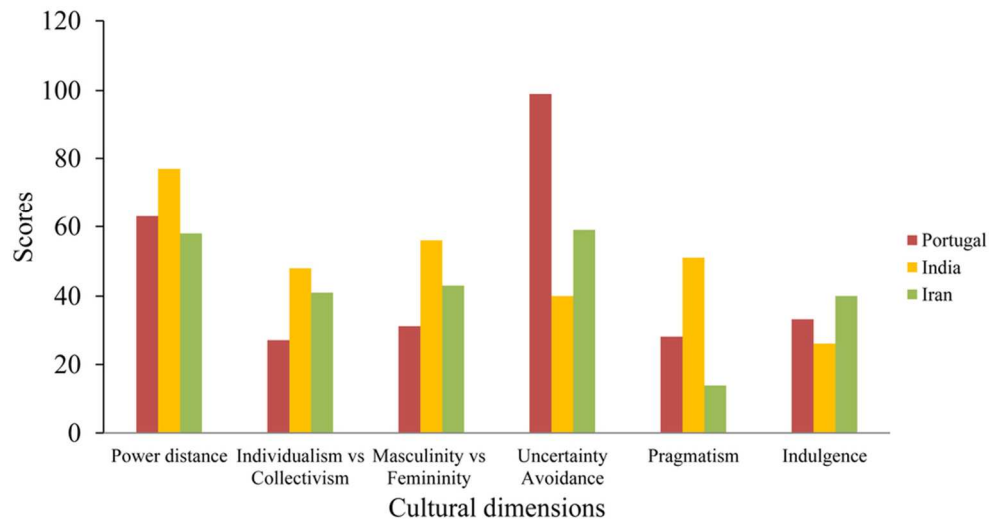

Bar graph showing Hofstede's cultural dimension values for Portugal, India and Iran. A high score power distance expresses that the less powerful members of a society accept and expect that power is distributed unequally. A high score on Individualism vs Collectivism can be defined as a preference for a loosely-knit social framework in which individuals are expected to take care of only themselves and their immediate families. A high score on 'Masculinity vs Femininity' suggests a preference in society for achievement, heroism, assertiveness and material rewards for success as opposed to cooperation, modesty, caring for the weak and quality of life. A high score on 'Uncertainty Avoidance' suggests members of a society feel uncomfortable with uncertainty and ambiguity. A high score on 'Pragmatism' suggests the society encourages thrift and efforts in modern education as a way to prepare for the future, as opposed to relying on time-honoured traditions. A high score on 'Indulgence' suggests the society follows gratification of basic and natural human drives related to enjoying life and having fun, as opposed to restrain in such activities based on social norms.

90x47mm (300 x 300 DPI)

**STROBE 2007 (v4) checklist of items to be included in reports of observational studies in epidemiology\***  
**Checklist for cohort, case-control, and cross-sectional studies (combined)**

| Section/Topic                | Item # | Recommendation                                                                                                                                                                       | Reported on page # |
|------------------------------|--------|--------------------------------------------------------------------------------------------------------------------------------------------------------------------------------------|--------------------|
| <b>Title and abstract</b>    | 1      | (a) Indicate the study's design with a commonly used term in the title or the abstract                                                                                               | 1                  |
|                              |        | (b) Provide in the abstract an informative and balanced summary of what was done and what was found                                                                                  | 2 & 3              |
| <b>Introduction</b>          |        |                                                                                                                                                                                      |                    |
| Background/rationale         | 2      | Explain the scientific background and rationale for the investigation being reported                                                                                                 | 4 – 6              |
| Objectives                   | 3      | State specific objectives, including any prespecified hypotheses                                                                                                                     | 6                  |
| <b>Methods</b>               |        |                                                                                                                                                                                      |                    |
| Study design                 | 4      | Present key elements of study design early in the paper                                                                                                                              | 7                  |
| Setting                      | 5      | Describe the setting, locations, and relevant dates, including periods of recruitment, exposure, follow-up, and data collection                                                      | 7                  |
| Participants                 | 6      | (a) Give the eligibility criteria, and the sources and methods of selection of participants                                                                                          | 7                  |
| Variables                    | 7      | Clearly define all outcomes, exposures, predictors, potential confounders, and effect modifiers. Give diagnostic criteria, if applicable                                             | 7 – 8              |
| Data sources/<br>measurement | 8*     | For each variable of interest, give sources of data and details of methods of assessment (measurement). Describe comparability of assessment methods if there is more than one group | 7 - 8              |
| Bias                         | 9      | Describe any efforts to address potential sources of bias                                                                                                                            | 7 & 15             |
| Study size                   | 10     | Explain how the study size was arrived at                                                                                                                                            | 7                  |
| Quantitative variables       | 11     | Explain how quantitative variables were handled in the analyses. If applicable, describe which groupings were chosen and why                                                         | 8                  |
| Statistical methods          | 12     | (a) Describe all statistical methods, including those used to control for confounding                                                                                                | 8                  |
|                              |        | (b) Describe any methods used to examine subgroups and interactions                                                                                                                  | 8                  |
|                              |        | (c) Explain how missing data were addressed                                                                                                                                          | NA                 |
|                              |        | (d) If applicable, describe analytical methods taking account of sampling strategy                                                                                                   | 8                  |
|                              |        | (e) Describe any sensitivity analyses                                                                                                                                                | 8                  |
| <b>Results</b>               |        |                                                                                                                                                                                      |                    |

|                          |     |                                                                                                                                                                                                              |         |
|--------------------------|-----|--------------------------------------------------------------------------------------------------------------------------------------------------------------------------------------------------------------|---------|
| Participants             | 13* | (a) Report numbers of individuals at each stage of study—eg numbers potentially eligible, examined for eligibility, confirmed eligible, included in the study, completing follow-up, and analysed            | 9       |
|                          |     | (b) Give reasons for non-participation at each stage                                                                                                                                                         | NA      |
|                          |     | (c) Consider use of a flow diagram                                                                                                                                                                           | NA      |
| Descriptive data         | 14* | (a) Give characteristics of study participants (eg demographic, clinical, social) and information on exposures and potential confounders                                                                     | 9 & 21  |
|                          |     | (b) Indicate number of participants with missing data for each variable of interest                                                                                                                          | NA      |
| Outcome data             | 15* | Report numbers of outcome events or summary measures                                                                                                                                                         | 9 - 11  |
| Main results             | 16  | (a) Give unadjusted estimates and, if applicable, confounder-adjusted estimates and their precision (eg, 95% confidence interval). Make clear which confounders were adjusted for and why they were included | 9 - 11  |
|                          |     | (b) Report category boundaries when continuous variables were categorized                                                                                                                                    | 9 - 11  |
|                          |     | (c) If relevant, consider translating estimates of relative risk into absolute risk for a meaningful time period                                                                                             | 9 - 11  |
| Other analyses           | 17  | Report other analyses done—eg analyses of subgroups and interactions, and sensitivity analyses                                                                                                               | 9 - 11  |
| <b>Discussion</b>        |     |                                                                                                                                                                                                              |         |
| Key results              | 18  | Summarise key results with reference to study objectives                                                                                                                                                     | 11 - 13 |
| Limitations              | 19  | Discuss limitations of the study, taking into account sources of potential bias or imprecision. Discuss both direction and magnitude of any potential bias                                                   | 15      |
| Interpretation           | 20  | Give a cautious overall interpretation of results considering objectives, limitations, multiplicity of analyses, results from similar studies, and other relevant evidence                                   | 13 - 15 |
| Generalisability         | 21  | Discuss the generalisability (external validity) of the study results                                                                                                                                        | 13 - 15 |
| <b>Other information</b> |     |                                                                                                                                                                                                              |         |
| Funding                  | 22  | Give the source of funding and the role of the funders for the present study and, if applicable, for the original study on which the present article is based                                                | 16      |

\*Give information separately for cases and controls in case-control studies and, if applicable, for exposed and unexposed groups in cohort and cross-sectional studies.

**Note:** An Explanation and Elaboration article discusses each checklist item and gives methodological background and published examples of transparent reporting. The STROBE checklist is best used in conjunction with this article (freely available on the Web sites of PLoS Medicine at <http://www.plosmedicine.org/>, Annals of Internal Medicine at <http://www.annals.org/>, and Epidemiology at <http://www.epidem.com/>). Information on the STROBE Initiative is available at [www.strobe-statement.org](http://www.strobe-statement.org).
